# Supplementary material for: Kinetics of associative detachment of O− + N2 and dissociative attachment of e− + N2O up to 1300 K: chemistry relevant to modeling of transient luminous events
Source: Royal Society of Chemistry journal article supplement (doi:10.1039/d3cp03856d), 2023-01-01
Supplement: d3cp03856d1.pdf [file d3cp03856d1.pdf]

| Theta<br>(degree) | Atomization energy |         |               |                | Relative energy |           |
|-------------------|--------------------|---------|---------------|----------------|-----------------|-----------|
|                   | rNN (Å)            | rNO (Å) | N2O (hartree) | N2O- (hartree) | N2O (eV)        | N2O- (eV) |
| 70                | 1                  | 1       | -183.8293481  | -183.7508632   | 16.0841         | 18.2197   |
| 70                | 1                  | 1.05    | -183.9315707  | -183.8534894   | 13.3027         | 15.4272   |
| 70                | 1                  | 1.1     | -184.0104469  | -183.9323712   | 11.1564         | 13.2809   |
| 70                | 1                  | 1.15    | -184.0710295  | -183.9927696   | 9.50798         | 11.6374   |
| 70                | 1                  | 1.2     | -184.1172947  | -184.0387897   | 8.2491          | 10.3852   |
| 70                | 1                  | 1.25    | -184.1523818  | -184.0736403   | 7.29438         | 9.43694   |
| 70                | 1                  | 1.3     | -184.1787671  | -184.0998259   | 6.57644         | 8.72443   |
| 70                | 1                  | 1.35    | -184.198397   | -184.119298    | 6.04231         | 8.19459   |
| 70                | 1                  | 1.4     | -184.2127999  | -184.1335752   | 5.6504          | 7.80611   |
| 70                | 1                  | 1.45    | -184.2231687  | -184.171849    | 5.36827         | 6.76468   |
| 70                | 1                  | 1.5     | -184.2304418  | -184.1937285   | 5.17037         | 6.16934   |
| 70                | 1                  | 1.55    | -184.2353589  | -              | 5.03658         | -         |
| 70                | 1                  | 1.6     | -184.2385123  | -184.2391271   | 4.95077         | 4.93404   |
| 70                | 1                  | 1.65    | -184.2403733  | -              | 4.90013         | -         |
| 70                | 1                  | 1.7     | -184.2413227  | -184.2771541   | 4.8743          | 3.89933   |
| 70                | 1                  | 1.75    | -184.2416634  | -              | 4.86503         | -         |
| 70                | 1                  | 1.8     | -184.2416317  | -184.30647     | 4.86589         | 3.10164   |
| 70                | 1                  | 1.85    | -184.2414063  | -              | 4.87202         | -         |
| 70                | 1                  | 1.9     | -184.2411131  | -184.3283287   | 4.88            | 2.50687   |
| 70                | 1                  | 1.95    | -184.2408368  | -              | 4.88752         | -         |
| 70                | 1                  | 2       | -184.240627   | -184.3443383   | 4.89323         | 2.07124   |
| 70                | 1                  | 2.1     | -             | -184.355873    | -               | 1.75738   |
| 70                | 1                  | 2.2     | -             | -184.3640314   | -               | 1.53539   |
| 70                | 1                  | 2.3     | -             | -184.3696759   | -               | 1.38181   |
| 70                | 1                  | 2.4     | -             | -184.3734743   | -               | 1.27845   |
| 70                | 1                  | 2.5     | -             | -184.3759376   | -               | 1.21143   |
| 70                | 1                  | 2.6     | -             | -184.3774499   | -               | 1.17028   |
| 70                | 1                  | 2.7     | -             | -184.3782981   | -               | 1.1472    |
| 70                | 1                  | 2.8     | -             | -184.3786918   | -               | 1.13649   |
| 70                | 1                  | 2.9     | -             | -184.3787811   | -               | 1.13406   |
| 70                | 1                  | 3       | -             | -184.3786716   | -               | 1.13704   |
| 70                | 1.05               | 1       | -183.9068575  | -183.8410673   | 13.9751         | 15.7652   |
| 70                | 1.05               | 1.05    | -184.0028317  | -183.9385137   | 11.3636         | 13.1137   |
| 70                | 1.05               | 1.1     | -184.0766601  | -184.0131912   | 9.35477         | 11.0818   |
| 70                | 1.05               | 1.15    | -184.1331559  | -184.070155    | 7.81752         | 9.53177   |
| 70                | 1.05               | 1.2     | -184.176071   | -184.113328    | 6.6498          | 8.35704   |
| 70                | 1.05               | 1.25    | -184.2083537  | -184.1457699   | 5.77139         | 7.47429   |
| 70                | 1.05               | 1.3     | -184.232325   | -184.1698686   | 5.11913         | 6.81856   |
| 70                | 1.05               | 1.35    | -184.2498126  | -184.1874852   | 4.64329         | 6.33922   |
| 70                | 1.05               | 1.4     | -184.2622528  | -184.2000705   | 4.30479         | 5.99677   |
| 70                | 1.05               | 1.45    | -184.2707805  | -184.220165    | 4.07275         | 5.45      |
| 70                | 1.05               | 1.5     | -184.2762885  | -184.2396811   | 3.92288         | 4.91897   |
| 70                | 1.05               | 1.55    | -184.2794936  | -              | 3.83567         | -         |
| 70                | 1.05               | 1.6     | -184.2809738  | -184.2801043   | 3.79539         | 3.81905   |
| 70                | 1.05               | 1.65    | -184.2812084  | -              | 3.78901         | -         |
| 70                | 1.05               | 1.7     | -184.2805851  | -184.3145058   | 3.80597         | 2.88299   |
| 70                | 1.05               | 1.75    | -184.2794261  | -              | 3.83751         | -         |
| 70                | 1.05               | 1.8     | -184.2779877  | -184.3411454   | 3.87664         | 2.15812   |
| 70                | 1.05               | 1.85    | -184.2764669  | -              | 3.91803         | -         |
| 70                | 1.05               | 1.9     | -184.2750064  | -184.3610137   | 3.95777         | 1.61751   |
| 70                | 1.05               | 1.95    | -184.2736967  | -              | 3.9934          | -         |
| 70                | 1.05               | 2       | -184.272589   | -184.3755686   | 4.02354         | 1.22147   |
| 70                | 1.05               | 2.1     | -             | -184.386063    | -               | 0.93592   |
| 70                | 1.05               | 2.2     | -             | -184.3934904   | -               | 0.73382   |
| 70                | 1.05               | 2.3     | -             | -184.3986272   | -               | 0.59404   |
| 70                | 1.05               | 2.4     | -             | -184.4020753   | -               | 0.50022   |
| 70                | 1.05               | 2.5     | -             | -184.4042961   | -               | 0.43979   |
| 70                | 1.05               | 2.6     | -             | -184.4056403   | -               | 0.40322   |
| 70                | 1.05               | 2.7     | -             | -184.4063703   | -               | 0.38335   |
| 70                | 1.05               | 2.8     | -             | -184.4066791   | -               | 0.37495   |
| 70                | 1.05               | 2.9     | -             | -184.4067062   | -               | 0.37421   |
| 70                | 1.05               | 3       | -             | -184.4065494   | -               | 0.37848   |
| 70                | 1.1                | 1       | -183.9638341  | -183.9096776   | 12.4248         | 13.8984   |
| 70                | 1.1                | 1.05    | -184.0537663  | -184.0022382   | 9.97771         | 11.3798   |
| 70                | 1.1                | 1.1     | -184.1226302  | -184.0729121   | 8.10392         | 9.45675   |
| 70                | 1.1                | 1.15    | -184.1750702  | -184.1266097   | 6.67703         | 7.99564   |
| 70                | 1.1                | 1.2     | -184.214663   | -184.1670958   | 5.59971         | 6.89401   |
| 70                | 1.1                | 1.25    | -184.2441903  | -184.1972928   | 4.79627         | 6.07235   |
| 70                | 1.1                | 1.3     | -184.2658312  | -184.2194772   | 4.20742         | 5.46871   |
| 70                | 1.1                | 1.35    | -184.2812951  | -184.2354231   | 3.78665         | 5.03483   |

|    |      |      |              |              |         |         |
|----|------|------|--------------|--------------|---------|---------|
| 70 | 1.1  | 1.4  | -184.2919292 | -184.2465134 | 3.4973  | 4.73306 |
| 70 | 1.1  | 1.45 | -184.2987945 | -184.2495738 | 3.31049 | 4.64979 |
| 70 | 1.1  | 1.5  | -184.3027362 | -184.2671037 | 3.20324 | 4.1728  |
| 70 | 1.1  | 1.55 | -184.3044339 | -            | 3.15704 | -       |
| 70 | 1.1  | 1.6  | -184.3044424 | -184.3025937 | 3.15681 | 3.20711 |
| 70 | 1.1  | 1.65 | -184.303222  | -            | 3.19002 | -       |
| 70 | 1.1  | 1.7  | -184.3011707 | -184.3333414 | 3.24583 | 2.37047 |
| 70 | 1.1  | 1.75 | -184.2986116 | -            | 3.31547 | -       |
| 70 | 1.1  | 1.8  | -184.2958213 | -184.35729   | 3.39139 | 1.71883 |
| 70 | 1.1  | 1.85 | -184.2930186 | -            | 3.46765 | -       |
| 70 | 1.1  | 1.9  | -184.2903668 | -184.3751312 | 3.53981 | 1.23337 |
| 70 | 1.1  | 1.95 | -184.2879779 | -            | 3.60481 | -       |
| 70 | 1.1  | 2    | -184.2859119 | -184.3881645 | 3.66103 | 0.87873 |
| 70 | 1.1  | 2.1  | -            | -184.3975371 | -       | 0.6237  |
| 70 | 1.1  | 2.2  | -            | -184.404152  | -       | 0.44371 |
| 70 | 1.1  | 2.3  | -            | -184.408708  | -       | 0.31974 |
| 70 | 1.1  | 2.4  | -            | -184.4117431 | -       | 0.23716 |
| 70 | 1.1  | 2.5  | -            | -184.4136719 | -       | 0.18468 |
| 70 | 1.1  | 2.6  | -            | -184.4148084 | -       | 0.15375 |
| 70 | 1.1  | 2.7  | -            | -184.4153899 | -       | 0.13793 |
| 70 | 1.1  | 2.8  | -            | -184.415591  | -       | 0.13246 |
| 70 | 1.1  | 2.9  | -            | -184.4155387 | -       | 0.13388 |
| 70 | 1.1  | 3    | -            | -184.4153227 | -       | 0.13976 |
| 70 | 1.15 | 1    | -184.0056418 | -183.9618041 | 11.2872 | 12.48   |
| 70 | 1.15 | 1.05 | -184.0898365 | -184.0497735 | 8.99624 | 10.0864 |
| 70 | 1.15 | 1.1  | -184.1539001 | -184.1166054 | 7.25307 | 8.26786 |
| 70 | 1.15 | 1.15 | -184.2023636 | -184.1671514 | 5.93438 | 6.8925  |
| 70 | 1.15 | 1.2  | -184.238677  | -184.2050552 | 4.94629 | 5.86114 |
| 70 | 1.15 | 1.25 | -184.265493  | -184.2331157 | 4.21663 | 5.09761 |
| 70 | 1.15 | 1.3  | -184.2848648 | -184.2535037 | 3.68952 | 4.54285 |
| 70 | 1.15 | 1.35 | -184.2983956 | -184.2679082 | 3.32135 | 4.15091 |
| 70 | 1.15 | 1.4  | -184.3073415 | -184.2776457 | 3.07793 | 3.88595 |
| 70 | 1.15 | 1.45 | -184.3126935 | -184.265811  | 2.9323  | 4.20797 |
| 70 | 1.15 | 1.5  | -184.3152411 | -184.2803604 | 2.86298 | 3.81208 |
| 70 | 1.15 | 1.55 | -184.3156203 | -            | 2.85266 | -       |
| 70 | 1.15 | 1.6  | -184.3143529 | -184.3110202 | 2.88715 | 2.97783 |
| 70 | 1.15 | 1.65 | -184.3118728 | -            | 2.95463 | -       |
| 70 | 1.15 | 1.7  | -184.3085643 | -184.3392715 | 3.04465 | 2.20911 |
| 70 | 1.15 | 1.75 | -184.3047472 | -            | 3.14852 | -       |
| 70 | 1.15 | 1.8  | -184.3007061 | -184.3597246 | 3.25848 | 1.65258 |
| 70 | 1.15 | 1.85 | -184.2966789 | -            | 3.36806 | -       |
| 70 | 1.15 | 1.9  | -184.2928524 | -184.3755548 | 3.47218 | 1.22184 |
| 70 | 1.15 | 1.95 | -184.2893627 | -            | 3.56713 | -       |
| 70 | 1.15 | 2    | -184.2862932 | -184.3870401 | 3.65065 | 0.90933 |
| 70 | 1.15 | 2.1  | -            | -184.3952479 | -       | 0.68599 |
| 70 | 1.15 | 2.2  | -            | -184.4010088 | -       | 0.52924 |
| 70 | 1.15 | 2.3  | -            | -184.4049521 | -       | 0.42194 |
| 70 | 1.15 | 2.4  | -            | -184.408048  | -       | 0.3377  |
| 70 | 1.15 | 2.5  | -            | -184.4096906 | -       | 0.29301 |
| 70 | 1.15 | 2.6  | -            | -184.4106085 | -       | 0.26803 |
| 70 | 1.15 | 2.7  | -            | -184.4110273 | -       | 0.25664 |
| 70 | 1.15 | 2.8  | -            | -184.4111084 | -       | 0.25443 |
| 70 | 1.15 | 2.9  | -            | -184.4109644 | -       | 0.25835 |
| 70 | 1.15 | 3    | -            | -184.4106806 | -       | 0.26607 |
| 70 | 1.2  | 1    | -184.0362442 | -184.0013578 | 10.4545 | 11.4037 |
| 70 | 1.2  | 1.05 | -184.1150577 | -184.085082  | 8.30997 | 9.12561 |
| 70 | 1.2  | 1.1  | -184.1745553 | -184.1482356 | 6.69104 | 7.4072  |
| 70 | 1.2  | 1.15 | -184.2191739 | -184.1957172 | 5.47697 | 6.11522 |
| 70 | 1.2  | 1.2  | -184.2522811 | -184.2311062 | 4.57612 | 5.15229 |
| 70 | 1.2  | 1.25 | -184.2764356 | -184.2570997 | 3.91888 | 4.44501 |
| 70 | 1.2  | 1.3  | -184.2935909 | -184.2757704 | 3.45208 | 3.93698 |
| 70 | 1.2  | 1.35 | -184.3052567 | -184.2887247 | 3.13466 | 3.58449 |
| 70 | 1.2  | 1.4  | -184.3126061 | -184.2972129 | 2.93468 | 3.35353 |
| 70 | 1.2  | 1.45 | -184.3165617 | -184.2733565 | 2.82705 | 4.00266 |
| 70 | 1.2  | 1.5  | -184.3178563 | -184.2842045 | 2.79182 | 3.70748 |
| 70 | 1.2  | 1.55 | -184.3170801 | -            | 2.81294 | -       |
| 70 | 1.2  | 1.6  | -184.3147164 | -184.3103855 | 2.87726 | 2.9951  |
| 70 | 1.2  | 1.65 | -184.3111702 | -            | 2.97375 | -       |
| 70 | 1.2  | 1.7  | -184.306789  | -184.3338808 | 3.09296 | 2.35579 |
| 70 | 1.2  | 1.75 | -184.3018836 | -            | 3.22644 | -       |
| 70 | 1.2  | 1.8  | -184.2967337 | -184.3524575 | 3.36656 | 1.85032 |
| 70 | 1.2  | 1.85 | -184.2915841 | -            | 3.50669 | -       |
| 70 | 1.2  | 1.9  | -184.2866387 | -184.3662156 | 3.64125 | 1.47596 |

|    |      |      |              |              |         |         |
|----|------|------|--------------|--------------|---------|---------|
| 70 | 1.2  | 1.95 | -184.2820645 | -            | 3.76571 | -       |
| 70 | 1.2  | 2    | -184.2779721 | -184.3761247 | 3.87707 | 1.20634 |
| 70 | 1.2  | 2.1  | -            | -184.3831425 | -       | 1.01538 |
| 70 | 1.2  | 2.2  | -            | -184.3880166 | -       | 0.88276 |
| 70 | 1.2  | 2.3  | -            | -184.3912969 | -       | 0.7935  |
| 70 | 1.2  | 2.4  | -            | -184.393408  | -       | 0.73606 |
| 70 | 1.2  | 2.5  | -            | -184.3946705 | -       | 0.70171 |
| 70 | 1.2  | 2.6  | -            | -184.3953261 | -       | 0.68387 |
| 70 | 1.2  | 2.7  | -            | -184.3955595 | -       | 0.67752 |
| 70 | 1.2  | 2.8  | -            | -184.3955069 | -       | 0.67895 |
| 70 | 1.2  | 2.9  | -            | -184.3952682 | -       | 0.68544 |
| 70 | 1.2  | 3    | -            | -184.3949141 | -       | 0.69508 |
| 70 | 1.25 | 1    | -184.0586076 | -184.0313085 | 9.84598 | 10.5888 |
| 70 | 1.25 | 1.05 | -184.1323874 | -184.1111936 | 7.83843 | 8.41511 |
| 70 | 1.25 | 1.1  | -184.1876065 | -184.1708742 | 6.33592 | 6.7912  |
| 70 | 1.25 | 1.15 | -184.2285643 | -184.215377  | 5.22145 | 5.58028 |
| 70 | 1.25 | 1.2  | -184.2585689 | -184.2482963 | 4.40503 | 4.68455 |
| 70 | 1.25 | 1.25 | -184.2801243 | -184.2722658 | 3.81851 | 4.03234 |
| 70 | 1.25 | 1.3  | -184.2951149 | -184.2892713 | 3.41061 | 3.56962 |
| 70 | 1.25 | 1.35 | -184.3049719 | -184.3008389 | 3.14241 | 3.25486 |
| 70 | 1.25 | 1.4  | -184.3107962 | -184.3081519 | 2.98393 | 3.05588 |
| 70 | 1.25 | 1.45 | -184.3134462 | -184.2742809 | 2.91182 | 3.97751 |
| 70 | 1.25 | 1.5  | -184.3135994 | -184.2826207 | 2.90765 | 3.75058 |
| 70 | 1.25 | 1.55 | -184.3118008 | -            | 2.95659 | -       |
| 70 | 1.25 | 1.6  | -184.3084959 | -            | 3.04652 | -       |
| 70 | 1.25 | 1.65 | -184.3040539 | -            | 3.16738 | -       |
| 70 | 1.25 | 1.7  | -184.2987867 | -            | 3.3107  | -       |
| 70 | 1.25 | 1.75 | -184.2929776 | -            | 3.46877 | -       |
| 70 | 1.25 | 1.8  | -184.286886  | -            | 3.63452 | -       |
| 70 | 1.25 | 1.85 | -184.2807528 | -            | 3.80141 | -       |
| 70 | 1.25 | 1.9  | -184.2747965 | -            | 3.96348 | -       |
| 70 | 1.25 | 1.95 | -184.269191  | -            | 4.116   | -       |
| 70 | 1.25 | 2    | -184.264089  | -            | 4.25483 | -       |
| 70 | 1.3  | 1    | -184.0749738 | -184.0539142 | 9.40065 | 9.97368 |
| 70 | 1.3  | 1.05 | -184.1440008 | -184.1303881 | 7.52243 | 7.89283 |
| 70 | 1.3  | 1.1  | -184.1952533 | -184.1868609 | 6.12785 | 6.35621 |
| 70 | 1.3  | 1.15 | -184.2328045 | -184.2285015 | 5.10608 | 5.22316 |
| 70 | 1.3  | 1.2  | -184.2598491 | -184.2589892 | 4.37019 | 4.39359 |
| 70 | 1.3  | 1.25 | -184.2788798 | -184.280955  | 3.85237 | 3.7959  |
| 70 | 1.3  | 1.3  | -184.2917541 | -184.2963257 | 3.50206 | 3.37767 |
| 70 | 1.3  | 1.35 | -184.2998506 | -184.3065505 | 3.28175 | 3.09945 |
| 70 | 1.3  | 1.4  | -184.3042052 | -184.3127415 | 3.16327 | 2.93099 |
| 70 | 1.3  | 1.45 | -184.3056177 | -184.2720058 | 3.12483 | 4.03941 |
| 70 | 1.3  | 1.5  | -184.3047157 | -184.2777224 | 3.14938 | 3.88386 |
| 70 | 1.3  | 1.55 | -184.3020012 | -            | 3.22324 | -       |
| 70 | 1.3  | 1.6  | -184.2978811 | -            | 3.33534 | -       |
| 70 | 1.3  | 1.65 | -184.2926892 | -            | 3.47662 | -       |
| 70 | 1.3  | 1.7  | -184.2867037 | -            | 3.63948 | -       |
| 70 | 1.3  | 1.75 | -184.2801704 | -            | 3.81725 | -       |
| 70 | 1.3  | 1.8  | -184.2733194 | -            | 4.00367 | -       |
| 70 | 1.3  | 1.85 | -184.266372  | -            | 4.19271 | -       |
| 70 | 1.3  | 1.9  | -184.2595365 | -            | 4.3787  | -       |
| 70 | 1.3  | 1.95 | -184.2530064 | -            | 4.55638 | -       |
| 70 | 1.3  | 2    | -184.2469526 | -            | 4.72111 | -       |
| 70 | 1.35 | 1    | -184.0870371 | -184.0709051 | 9.07241 | 9.51136 |
| 70 | 1.35 | 1.05 | -184.1515044 | -184.1443655 | 7.31825 | 7.51251 |
| 70 | 1.35 | 1.1  | -184.1990429 | -184.1979363 | 6.02473 | 6.05484 |
| 70 | 1.35 | 1.15 | -184.2335346 | -184.2368867 | 5.08621 | 4.995   |
| 70 | 1.35 | 1.2  | -184.2578688 | -184.265004  | 4.42408 | 4.22993 |
| 70 | 1.35 | 1.25 | -184.2744765 | -184.2849746 | 3.97218 | 3.68653 |
| 70 | 1.35 | 1.3  | -184.285271  | -184.2987147 | 3.67847 | 3.31266 |
| 70 | 1.35 | 1.35 | -184.2916299 | -184.3076203 | 3.50544 | 3.07034 |
| 70 | 1.35 | 1.4  | -184.2945518 | -184.3127273 | 3.42593 | 2.93138 |
| 70 | 1.35 | 1.45 | -184.2947762 | -184.2677602 | 3.41983 | 4.15493 |
| 70 | 1.35 | 1.5  | -184.2928821 | -184.2709938 | 3.47137 | 4.06695 |
| 70 | 1.35 | 1.55 | -184.28933   | -            | 3.56802 | -       |
| 70 | 1.35 | 1.6  | -184.2844917 | -            | 3.69967 | -       |
| 70 | 1.35 | 1.65 | -184.2786684 | -            | 3.85812 | -       |
| 70 | 1.35 | 1.7  | -184.2721052 | -            | 4.03671 | -       |
| 70 | 1.35 | 1.75 | -184.2650094 | -            | 4.22978 | -       |
| 70 | 1.35 | 1.8  | -184.2575738 | -            | 4.43211 | -       |
| 70 | 1.35 | 1.85 | -184.2499887 | -            | 4.6385  | -       |
| 70 | 1.35 | 1.9  | -184.2424451 | -            | 4.84376 | -       |

|    |      |      |              |              |         |         |
|----|------|------|--------------|--------------|---------|---------|
| 70 | 1.35 | 1.95 | -184.2351317 | -            | 5.04276 | -       |
| 70 | 1.35 | 2    | -184.2282215 | -            | 5.23078 | -       |
| 70 | 1.4  | 1    | -184.0960369 | -184.0836133 | 8.82753 | 9.16557 |
| 70 | 1.4  | 1.05 | -184.1561244 | -184.154394  | 7.19254 | 7.23963 |
| 70 | 1.4  | 1.1  | -184.2000306 | -184.2053693 | 5.99786 | 5.85259 |
| 70 | 1.4  | 1.15 | -184.2317842 | -184.2418492 | 5.13384 | 4.85997 |
| 70 | 1.4  | 1.2  | -184.2538727 | -184.2677063 | 4.53281 | 4.1564  |
| 70 | 1.4  | 1.25 | -184.2683448 | -184.2857079 | 4.13903 | 3.66658 |
| 70 | 1.4  | 1.3  | -184.277117  | -184.2978075 | 3.90034 | 3.33735 |
| 70 | 1.4  | 1.35 | -184.2817191 | -184.3053902 | 3.77511 | 3.13102 |
| 70 | 1.4  | 1.4  | -184.2831894 | -184.3094355 | 3.73511 | 3.02095 |
| 70 | 1.4  | 1.45 | -184.2822366 | -184.262374  | 3.76103 | 4.30149 |
| 70 | 1.4  | 1.5  | -184.2793856 | -184.2635571 | 3.83861 | 4.2693  |
| 70 | 1.4  | 1.55 | -184.2750503 | -            | 3.95657 | -       |
| 70 | 1.4  | 1.6  | -184.2695661 | -            | 4.1058  | -       |
| 70 | 1.4  | 1.65 | -184.2632032 | -            | 4.27893 | -       |
| 70 | 1.4  | 1.7  | -184.2561737 | -            | 4.4702  | -       |
| 70 | 1.4  | 1.75 | -184.248648  | -            | 4.67498 | -       |
| 70 | 1.4  | 1.8  | -184.2407773 | -            | 4.88914 | -       |
| 70 | 1.4  | 1.85 | -184.2327173 | -            | 5.10845 | -       |
| 70 | 1.4  | 1.9  | -184.2246326 | -            | 5.32844 | -       |
| 70 | 1.4  | 1.95 | -184.2166931 | -            | 5.54447 | -       |
| 70 | 1.4  | 2    | -184.2090607 | -            | 5.75215 | -       |
| 70 | 1.45 | 1    | -184.10282   | -184.0930611 | 8.64296 | 8.9085  |
| 70 | 1.45 | 1.05 | -184.1588068 | -184.1614212 | 7.11956 | 7.04842 |
| 70 | 1.45 | 1.1  | -184.199036  | -184.2100714 | 6.02492 | 5.72465 |
| 70 | 1.45 | 1.15 | -184.2280845 | -184.2443127 | 5.23451 | 4.79294 |
| 70 | 1.45 | 1.2  | -184.2484032 | -184.268058  | 4.68164 | 4.14683 |
| 70 | 1.45 | 1.25 | -184.2614475 | -184.2841456 | 4.3267  | 3.70909 |
| 70 | 1.45 | 1.3  | -184.2686295 | -184.2945898 | 4.13128 | 3.4249  |
| 70 | 1.45 | 1.35 | -184.2715168 | -184.3008014 | 4.05272 | 3.25588 |
| 70 | 1.45 | 1.4  | -184.2714333 | -184.3038123 | 4.05499 | 3.17396 |
| 70 | 1.45 | 1.45 | -184.2692183 | -184.2564309 | 4.11526 | 4.4632  |
| 70 | 1.45 | 1.5  | -184.2653818 | -184.2562574 | 4.21965 | 4.46793 |
| 70 | 1.45 | 1.55 | -184.2602859 | -            | 4.35831 | -       |
| 70 | 1.45 | 1.6  | -184.2542223 | -            | 4.5233  | -       |
| 70 | 1.45 | 1.65 | -184.2474257 | -            | 4.70824 | -       |
| 70 | 1.45 | 1.7  | -184.2400728 | -            | 4.90831 | -       |
| 70 | 1.45 | 1.75 | -184.2322825 | -            | 5.12028 | -       |
| 70 | 1.45 | 1.8  | -184.2241436 | -            | 5.34174 | -       |
| 70 | 1.45 | 1.85 | -184.2157452 | -            | 5.57026 | -       |
| 70 | 1.45 | 1.9  | -184.2072154 | -            | 5.80236 | -       |
| 70 | 1.45 | 1.95 | -184.1987123 | -            | 6.03373 | -       |
| 70 | 1.45 | 2    | -184.1904152 | -            | 6.25949 | -       |
| 70 | 1.5  | 1    | -184.1079202 | -184.1000249 | 8.50418 | 8.71901 |
| 70 | 1.5  | 1.05 | -184.1602217 | -184.1661448 | 7.08106 | 6.91989 |
| 70 | 1.5  | 1.1  | -184.1968031 | -184.2126684 | 6.08568 | 5.65398 |
| 70 | 1.5  | 1.15 | -184.2228871 | -184.2448572 | 5.37593 | 4.77812 |
| 70 | 1.5  | 1.2  | -184.2414298 | -184.2666219 | 4.87138 | 4.18591 |
| 70 | 1.5  | 1.25 | -184.2537207 | -184.2808207 | 4.53695 | 3.79956 |
| 70 | 1.5  | 1.3  | -184.2604194 | -184.2894896 | 4.35468 | 3.56368 |
| 70 | 1.5  | 1.35 | -184.2624211 | -184.2940423 | 4.30021 | 3.4398  |
| 70 | 1.5  | 1.4  | -184.2610214 | -184.2968235 | 4.3383  | 3.36412 |
| 70 | 1.5  | 1.45 | -184.2574564 | -184.2503882 | 4.4353  | 4.62763 |
| 70 | 1.5  | 1.5  | -184.2525273 | -184.2495775 | 4.56942 | 4.64969 |
| 70 | 1.5  | 1.55 | -184.2466788 | -            | 4.72856 | -       |
| 70 | 1.5  | 1.6  | -184.2402043 | -            | 4.90473 | -       |
| 70 | 1.5  | 1.65 | -184.2333463 | -            | 5.09134 | -       |
| 70 | 1.5  | 1.7  | -184.226272  | -            | 5.28383 | -       |
| 70 | 1.5  | 1.75 | -184.2190205 | -            | 5.48114 | -       |
| 70 | 1.5  | 1.8  | -184.2111489 | -            | 5.68607 | -       |
| 70 | 1.5  | 1.85 | -184.2035565 | -            | 5.90192 | -       |
| 70 | 1.5  | 1.9  | -184.1952111 | -            | 6.129   | -       |
| 70 | 1.5  | 1.95 | -184.1865594 | -            | 6.36441 | -       |
| 70 | 1.5  | 2    | -184.1727854 | -            | 6.7392  | -       |
| 75 | 1    | 1.6  | -            | -184.2579137 | -       | 4.42286 |
| 75 | 1    | 1.7  | -            | -184.2913978 | -       | 3.51176 |
| 75 | 1    | 1.8  | -            | -184.3171666 | -       | 2.81059 |
| 75 | 1    | 1.9  | -            | -184.336347  | -       | 2.28869 |
| 75 | 1    | 2    | -            | -184.3503052 | -       | 1.90888 |
| 75 | 1    | 2.1  | -            | -184.3602572 | -       | 1.63809 |
| 75 | 1    | 2.2  | -            | -184.3672006 | -       | 1.44916 |
| 75 | 1    | 2.3  | -            | -184.3719232 | -       | 1.32066 |

|    |      |      |              |              |         |         |
|----|------|------|--------------|--------------|---------|---------|
| 75 | 1    | 2.4  | -            | -184.375033  | -       | 1.23604 |
| 75 | 1    | 2.5  | -            | -184.37699   | -       | 1.18279 |
| 75 | 1    | 2.6  | -            | -184.3781373 | -       | 1.15157 |
| 75 | 1    | 2.7  | -            | -184.3787272 | -       | 1.13552 |
| 75 | 1    | 2.8  | -            | -184.3789419 | -       | 1.12968 |
| 75 | 1    | 2.9  | -            | -184.3789087 | -       | 1.13059 |
| 75 | 1    | 3    | -            | -184.3787168 | -       | 1.1358  |
| 75 | 1.05 | 1.6  | -            | -184.2988303 | -       | 3.30952 |
| 75 | 1.05 | 1.7  | -            | -184.3283317 | -       | 2.50678 |
| 75 | 1.05 | 1.8  | -            | -184.3513    | -       | 1.88182 |
| 75 | 1.05 | 1.9  | -            | -184.3685204 | -       | 1.41325 |
| 75 | 1.05 | 2    | -            | -184.3811115 | -       | 1.07065 |
| 75 | 1.05 | 2.1  | -            | -184.3901178 | -       | 0.82558 |
| 75 | 1.05 | 2.2  | -            | -184.3964105 | -       | 0.65436 |
| 75 | 1.05 | 2.3  | -            | -184.4006869 | -       | 0.538   |
| 75 | 1.05 | 2.4  | -            | -184.4034905 | -       | 0.46171 |
| 75 | 1.05 | 2.5  | -            | -184.4052368 | -       | 0.4142  |
| 75 | 1.05 | 2.6  | -            | -184.406238  | -       | 0.38695 |
| 75 | 1.05 | 2.7  | -            | -184.4067246 | -       | 0.37371 |
| 75 | 1.05 | 2.8  | -            | -184.4068655 | -       | 0.36988 |
| 75 | 1.05 | 2.9  | -            | -184.4067783 | -       | 0.37225 |
| 75 | 1.05 | 3    | -            | -184.4065461 | -       | 0.37857 |
| 75 | 1.1  | 1.6  | -            | -184.3213998 | -       | 2.6954  |
| 75 | 1.1  | 1.7  | -            | -184.3468436 | -       | 2.00307 |
| 75 | 1.1  | 1.8  | -            | -184.3669529 | -       | 1.4559  |
| 75 | 1.1  | 1.9  | -            | -184.3821349 | -       | 1.0428  |
| 75 | 1.1  | 2    | -            | -184.3932614 | -       | 0.74005 |
| 75 | 1.1  | 2.1  | -            | -184.401222  | -       | 0.52344 |
| 75 | 1.1  | 2.2  | -            | -184.4067767 | -       | 0.3723  |
| 75 | 1.1  | 2.3  | -            | -184.4105353 | -       | 0.27002 |
| 75 | 1.1  | 2.4  | -            | -184.412976  | -       | 0.20361 |
| 75 | 1.1  | 2.5  | -            | -184.4144676 | -       | 0.16303 |
| 75 | 1.1  | 2.6  | -            | -184.415289  | -       | 0.14068 |
| 75 | 1.1  | 2.7  | -            | -184.4156485 | -       | 0.13089 |
| 75 | 1.1  | 2.8  | -            | -184.4156967 | -       | 0.12958 |
| 75 | 1.1  | 2.9  | -            | -184.4155414 | -       | 0.13381 |
| 75 | 1.1  | 3    | -            | -184.4152588 | -       | 0.1415  |
| 75 | 1.15 | 1.6  | -            | -184.3308627 | -       | 2.43792 |
| 75 | 1.15 | 1.7  | -            | -184.3519926 | -       | 1.86297 |
| 75 | 1.15 | 1.8  | -            | -184.3690105 | -       | 1.39991 |
| 75 | 1.15 | 1.9  | -            | -184.3825662 | -       | 1.03106 |
| 75 | 1.15 | 2    | -            | -184.3923761 | -       | 0.76413 |
| 75 | 1.15 | 2.1  | -            | -184.3992449 | -       | 0.57724 |
| 75 | 1.15 | 2.2  | -            | -184.4039924 | -       | 0.44806 |
| 75 | 1.15 | 2.3  | -            | -184.4071679 | -       | 0.36165 |
| 75 | 1.15 | 2.4  | -            | -184.4091901 | -       | 0.30663 |
| 75 | 1.15 | 2.5  | -            | -184.4103824 | -       | 0.27418 |
| 75 | 1.15 | 2.6  | -            | -184.4109904 | -       | 0.25764 |
| 75 | 1.15 | 2.7  | -            | -184.4111957 | -       | 0.25205 |
| 75 | 1.15 | 2.8  | -            | -184.4111324 | -       | 0.25378 |
| 75 | 1.15 | 2.9  | -            | -184.4108958 | -       | 0.26022 |
| 75 | 1.15 | 3    | -            | -184.4105527 | -       | 0.26955 |
| 75 | 1.2  | 1.6  | -            | -184.3314661 | -       | 2.4215  |
| 75 | 1.2  | 1.7  | -            | -184.348161  | -       | 1.96723 |
| 75 | 1.2  | 1.8  | -            | -184.3618576 | -       | 1.59454 |
| 75 | 1.2  | 1.9  | -            | -184.3724848 | -       | 1.30538 |
| 75 | 1.2  | 2    | -            | -184.3803776 | -       | 1.09061 |
| 75 | 1.2  | 2.1  | -            | -184.3860389 | -       | 0.93657 |
| 75 | 1.2  | 2.2  | -            | -184.3899595 | -       | 0.82989 |
| 75 | 1.2  | 2.3  | -            | -184.3925595 | -       | 0.75915 |
| 75 | 1.2  | 2.4  | -            | -184.3941806 | -       | 0.71503 |
| 75 | 1.2  | 2.5  | -            | -184.3950917 | -       | 0.69024 |
| 75 | 1.2  | 2.6  | -            | -184.3955002 | -       | 0.67913 |
| 75 | 1.2  | 2.7  | -            | -184.3955649 | -       | 0.67737 |
| 75 | 1.2  | 2.8  | -            | -184.395399  | -       | 0.68188 |
| 75 | 1.2  | 2.9  | -            | -184.3950892 | -       | 0.69031 |
| 75 | 1.2  | 3    | -            | -184.3946933 | -       | 0.70108 |
| 80 | 1    | 1    | -183.9220595 | -183.8524108 | 13.5614 | 15.4566 |
| 80 | 1    | 1.05 | -184.0080403 | -183.9142145 | 11.2219 | 13.7749 |
| 80 | 1    | 1.1  | -184.0723315 | -183.9836429 | 9.47255 | 11.8858 |
| 80 | 1    | 1.15 | -184.1202342 | -184.0336783 | 8.16912 | 10.5243 |
| 80 | 1    | 1.2  | -184.1557479 | -184.094937  | 7.20279 | 8.85745 |
| 80 | 1    | 1.25 | -184.181901  | -184.1272162 | 6.49116 | 7.97914 |

|    |      |      |              |              |         |         |
|----|------|------|--------------|--------------|---------|---------|
| 80 | 1    | 1.3  | -184.2009876 | -184.154733  | 5.97182 | 7.23041 |
| 80 | 1    | 1.35 | -184.2147458 | -184.1794347 | 5.59746 | 6.55827 |
| 80 | 1    | 1.4  | -184.2244901 | -184.2014695 | 5.33231 | 5.9587  |
| 80 | 1    | 1.45 | -184.2312217 | -184.2221542 | 5.14915 | 5.39587 |
| 80 | 1    | 1.5  | -184.2357078 | -184.2415623 | 5.02708 | 4.86778 |
| 80 | 1    | 1.55 | -184.2385425 | -            | 4.94995 | -       |
| 80 | 1    | 1.6  | -184.2401912 | -184.2761645 | 4.90509 | 3.92625 |
| 80 | 1    | 1.65 | -184.2410185 | -            | 4.88258 | -       |
| 80 | 1    | 1.7  | -184.2413094 | -184.3044658 | 4.87466 | 3.15617 |
| 80 | 1    | 1.75 | -184.2412818 | -            | 4.87541 | -       |
| 80 | 1    | 1.8  | -184.2410989 | -184.3264902 | 4.88039 | 2.55689 |
| 80 | 1    | 1.85 | -184.2408699 | -            | 4.88662 | -       |
| 80 | 1    | 1.9  | -184.2406683 | -184.3430089 | 4.89211 | 2.10742 |
| 80 | 1    | 1.95 | -184.2405329 | -            | 4.89579 | -       |
| 80 | 1    | 2    | -184.2404821 | -184.3550463 | 4.89717 | 1.77988 |
| 80 | 1    | 2.1  | -            | -184.3635957 | -       | 1.54725 |
| 80 | 1    | 2.2  | -            | -184.3695119 | -       | 1.38627 |
| 80 | 1    | 2.3  | -            | -184.373486  | -       | 1.27814 |
| 80 | 1    | 2.4  | -            | -184.3760553 | -       | 1.20822 |
| 80 | 1    | 2.5  | -            | -184.3776274 | -       | 1.16545 |
| 80 | 1    | 2.6  | -            | -184.3785065 | -       | 1.14153 |
| 80 | 1    | 2.7  | -            | -184.3789122 | -       | 1.13049 |
| 80 | 1    | 2.8  | -            | -184.379003  | -       | 1.12802 |
| 80 | 1    | 2.9  | -            | -184.378889  | -       | 1.13112 |
| 80 | 1    | 3    | -            | -184.3786461 | -       | 1.13773 |
| 80 | 1.05 | 1    | -183.991988  | -183.9240142 | 11.6587 | 13.5083 |
| 80 | 1.05 | 1.05 | -184.0735202 | -183.968773  | 9.4402  | 12.2904 |
| 80 | 1.05 | 1.1  | -184.1339558 | -184.0568847 | 7.79575 | 9.89286 |
| 80 | 1.05 | 1.15 | -184.1785023 | -184.1046283 | 6.58364 | 8.59375 |
| 80 | 1.05 | 1.2  | -184.211068  | -184.1554683 | 5.69753 | 7.2104  |
| 80 | 1.05 | 1.25 | -184.2345974 | -184.1866252 | 5.05729 | 6.36262 |
| 80 | 1.05 | 1.3  | -184.2513141 | -184.2125935 | 4.60243 | 5.65602 |
| 80 | 1.05 | 1.35 | -184.2628967 | -184.2345827 | 4.28727 | 5.05769 |
| 80 | 1.05 | 1.4  | -184.2706172 | -184.2541157 | 4.0772  | 4.5262  |
| 80 | 1.05 | 1.45 | -184.2754457 | -184.2718298 | 3.94581 | 4.0442  |
| 80 | 1.05 | 1.5  | -184.2781305 | -184.2881384 | 3.87276 | 3.60044 |
| 80 | 1.05 | 1.55 | -184.2792591 | -            | 3.84205 | -       |
| 80 | 1.05 | 1.6  | -184.2792987 | -184.3171322 | 3.84097 | 2.81152 |
| 80 | 1.05 | 1.65 | -184.2786227 | -            | 3.85937 | -       |
| 80 | 1.05 | 1.7  | -184.277527  | -184.3412375 | 3.88918 | 2.15562 |
| 80 | 1.05 | 1.75 | -184.2762398 | -            | 3.9242  | -       |
| 80 | 1.05 | 1.8  | -184.2749279 | -184.3603579 | 3.9599  | 1.63535 |
| 80 | 1.05 | 1.85 | -184.273707  | -            | 3.99312 | -       |
| 80 | 1.05 | 1.9  | -184.2726443 | -184.3749069 | 4.02204 | 1.23947 |
| 80 | 1.05 | 1.95 | -184.2717731 | -            | 4.04574 | -       |
| 80 | 1.05 | 2    | -184.2710979 | -184.3856128 | 4.06412 | 0.94816 |
| 80 | 1.05 | 2.1  | -            | -184.3932625 | -       | 0.74002 |
| 80 | 1.05 | 2.2  | -            | -184.3985702 | -       | 0.59559 |
| 80 | 1.05 | 2.3  | -            | -184.4021318 | -       | 0.49868 |
| 80 | 1.05 | 2.4  | -            | -184.4044203 | -       | 0.43641 |
| 80 | 1.05 | 2.5  | -            | -184.4057998 | -       | 0.39888 |
| 80 | 1.05 | 2.6  | -            | -184.4065447 | -       | 0.37861 |
| 80 | 1.05 | 2.7  | -            | -184.406858  | -       | 0.37008 |
| 80 | 1.05 | 2.8  | -            | -184.406882  | -       | 0.36943 |
| 80 | 1.05 | 2.9  | -            | -184.4067193 | -       | 0.37386 |
| 80 | 1.05 | 3    | -            | -184.4064403 | -       | 0.38145 |
| 80 | 1.1  | 1    | -184.0414869 | -183.9753973 | 10.3118 | 12.1101 |
| 80 | 1.1  | 1.05 | -184.1187847 | -184.013221  | 8.20856 | 11.0809 |
| 80 | 1.1  | 1.1  | -184.1755234 | -184.1100773 | 6.6647  | 8.44549 |
| 80 | 1.1  | 1.15 | -184.2168389 | -184.1555658 | 5.5405  | 7.20774 |
| 80 | 1.1  | 1.2  | -184.246568  | -184.197785  | 4.73157 | 6.05896 |
| 80 | 1.1  | 1.25 | -184.2675882 | -184.2269858 | 4.15961 | 5.2644  |
| 80 | 1.1  | 1.3  | -184.2820579 | -184.2509528 | 3.76589 | 4.61226 |
| 80 | 1.1  | 1.35 | -184.291602  | -184.2709496 | 3.5062  | 4.06815 |
| 80 | 1.1  | 1.4  | -184.2974462 | -184.2880024 | 3.34718 | 3.60414 |
| 80 | 1.1  | 1.45 | -184.3005215 | -184.3029283 | 3.2635  | 3.19801 |
| 80 | 1.1  | 1.5  | -184.3015476 | -184.3163205 | 3.23558 | 2.83361 |
| 80 | 1.1  | 1.55 | -184.3010926 | -            | 3.24796 | -       |
| 80 | 1.1  | 1.6  | -184.2996165 | -184.3398229 | 3.28812 | 2.19411 |
| 80 | 1.1  | 1.65 | -184.2974959 | -            | 3.34583 | -       |
| 80 | 1.1  | 1.7  | -184.2950373 | -184.3596258 | 3.41272 | 1.65527 |
| 80 | 1.1  | 1.75 | -184.2924834 | -            | 3.48222 | -       |
| 80 | 1.1  | 1.8  | -184.2900158 | -184.3757119 | 3.54936 | 1.21757 |

|    |      |      |              |              |         |         |
|----|------|------|--------------|--------------|---------|---------|
| 80 | 1.1  | 1.85 | -184.2877593 | -            | 3.61076 | -       |
| 80 | 1.1  | 1.9  | -184.285787  | -184.3881839 | 3.66442 | 0.87821 |
| 80 | 1.1  | 1.95 | -184.2841293 | -            | 3.70953 | -       |
| 80 | 1.1  | 2    | -184.2827887 | -184.3974643 | 3.74601 | 0.62569 |
| 80 | 1.1  | 2.1  | -            | -184.4041267 | -       | 0.4444  |
| 80 | 1.1  | 2.2  | -            | -184.4087482 | -       | 0.31865 |
| 80 | 1.1  | 2.3  | -            | -184.4118334 | -       | 0.2347  |
| 80 | 1.1  | 2.4  | -            | -184.4137905 | -       | 0.18145 |
| 80 | 1.1  | 2.5  | -            | -184.4149389 | -       | 0.1502  |
| 80 | 1.1  | 2.6  | -            | -184.4155218 | -       | 0.13434 |
| 80 | 1.1  | 2.7  | -            | -184.415718  | -       | 0.129   |
| 80 | 1.1  | 2.8  | -            | -184.41566   | -       | 0.13058 |
| 80 | 1.1  | 2.9  | -            | -184.4154368 | -       | 0.13665 |
| 80 | 1.1  | 3    | -            | -184.4151131 | -       | 0.14546 |
| 80 | 1.15 | 1    | -184.0760081 | -184.012134  | 9.37251 | 11.1105 |
| 80 | 1.15 | 1.05 | -184.1493056 | -184.0427518 | 7.37808 | 10.2774 |
| 80 | 1.15 | 1.1  | -184.2025331 | -184.1480471 | 5.92977 | 7.41233 |
| 80 | 1.15 | 1.15 | -184.2407673 | -184.1913256 | 4.88941 | 6.23472 |
| 80 | 1.15 | 1.2  | -184.2677887 | -184.2255457 | 4.15416 | 5.30359 |
| 80 | 1.15 | 1.25 | -184.2864194 | -184.2533806 | 3.64722 | 4.5462  |
| 80 | 1.15 | 1.3  | -184.2987671 | -184.2755549 | 3.31124 | 3.94284 |
| 80 | 1.15 | 1.35 | -184.3064069 | -184.2934349 | 3.10336 | 3.45633 |
| 80 | 1.15 | 1.4  | -184.310519  | -184.3081222 | 2.99147 | 3.05668 |
| 80 | 1.15 | 1.45 | -184.311996  | -184.3204902 | 2.95128 | 2.72015 |
| 80 | 1.15 | 1.5  | -184.3115187 | -184.3312093 | 2.96427 | 2.42848 |
| 80 | 1.15 | 1.55 | -184.3096266 | -            | 3.01575 | -       |
| 80 | 1.15 | 1.6  | -184.3067599 | -184.3494659 | 3.09375 | 1.93172 |
| 80 | 1.15 | 1.65 | -184.3032882 | -            | 3.18822 | -       |
| 80 | 1.15 | 1.7  | -184.2995244 | -184.3648601 | 3.29063 | 1.51284 |
| 80 | 1.15 | 1.75 | -184.2957228 | -            | 3.39407 | -       |
| 80 | 1.15 | 1.8  | -184.2920867 | -184.3776757 | 3.49301 | 1.16413 |
| 80 | 1.15 | 1.85 | -184.2887615 | -            | 3.58349 | -       |
| 80 | 1.15 | 1.9  | -184.2858285 | -184.3878586 | 3.6633  | 0.88706 |
| 80 | 1.15 | 1.95 | -184.2833331 | -            | 3.7312  | -       |
| 80 | 1.15 | 2    | -184.2812708 | -184.3955744 | 3.78731 | 0.67711 |
| 80 | 1.15 | 2.1  | -            | -184.4011784 | -       | 0.52463 |
| 80 | 1.15 | 2.2  | -            | -184.4056163 | -       | 0.40387 |
| 80 | 1.15 | 2.3  | -            | -184.4082526 | -       | 0.33214 |
| 80 | 1.15 | 2.4  | -            | -184.409853  | -       | 0.28859 |
| 80 | 1.15 | 2.5  | -            | -184.4107404 | -       | 0.26444 |
| 80 | 1.15 | 2.6  | -            | -184.4111344 | -       | 0.25372 |
| 80 | 1.15 | 2.7  | -            | -184.4111944 | -       | 0.25209 |
| 80 | 1.15 | 2.8  | -            | -184.4110356 | -       | 0.25641 |
| 80 | 1.15 | 2.9  | -            | -184.4107393 | -       | 0.26447 |
| 80 | 1.15 | 3    | -            | -184.4103616 | -       | 0.27475 |
| 80 | 1.2  | 1    | -184.0996015 | -184.0385266 | 8.73053 | 10.3924 |
| 80 | 1.2  | 1.05 | -184.169128  | -184.0614748 | 6.83872 | 9.76796 |
| 80 | 1.2  | 1.1  | -184.2190491 | -184.1745962 | 5.48036 | 6.68993 |
| 80 | 1.2  | 1.15 | -184.2543762 | -184.2157134 | 4.51911 | 5.57113 |
| 80 | 1.2  | 1.2  | -184.2788355 | -184.2441252 | 3.85358 | 4.79804 |
| 80 | 1.2  | 1.25 | -184.2952058 | -184.2700683 | 3.40814 | 4.09213 |
| 80 | 1.2  | 1.3  | -184.3055565 | -184.290197  | 3.1265  | 3.54443 |
| 80 | 1.2  | 1.35 | -184.3114213 | -184.3059208 | 2.96692 | 3.11659 |
| 80 | 1.2  | 1.4  | -184.313941  | -184.3183541 | 2.89836 | 2.77827 |
| 80 | 1.2  | 1.45 | -184.3139673 | -184.3283779 | 2.89764 | 2.50553 |
| 80 | 1.2  | 1.5  | -184.3121447 | -184.3366808 | 2.94723 | 2.27961 |
| 80 | 1.2  | 1.55 | -184.3089749 | -            | 3.03348 | -       |
| 80 | 1.2  | 1.6  | -184.3048667 | -184.3500891 | 3.14527 | 1.91476 |
| 80 | 1.2  | 1.65 | -184.3001701 | -            | 3.27306 | -       |
| 80 | 1.2  | 1.7  | -184.2951917 | -184.3611361 | 3.40852 | 1.61418 |
| 80 | 1.2  | 1.75 | -184.2901992 | -            | 3.54437 | -       |
| 80 | 1.2  | 1.8  | -184.2854092 | -184.3705398 | 3.67471 | 1.3583  |
| 80 | 1.2  | 1.85 | -184.2809942 | -            | 3.79484 | -       |
| 80 | 1.2  | 1.9  | -184.277061  | -184.3782327 | 3.90186 | 1.14898 |
| 80 | 1.2  | 1.95 | -184.2736685 | -            | 3.99417 | -       |
| 80 | 1.2  | 2    | -184.2708255 | -184.3841802 | 4.07153 | 0.98715 |
| 80 | 1.2  | 2.1  | -            | -184.3885386 | -       | 0.86855 |
| 80 | 1.2  | 2.2  | -            | -184.3915682 | -       | 0.78612 |
| 80 | 1.2  | 2.3  | -            | -184.3935478 | -       | 0.73225 |
| 80 | 1.2  | 2.4  | -            | -184.3947406 | -       | 0.6998  |
| 80 | 1.2  | 2.5  | -            | -184.395353  | -       | 0.68313 |
| 80 | 1.2  | 2.6  | -            | -184.3955586 | -       | 0.67754 |
| 80 | 1.2  | 2.7  | -            | -184.3954878 | -       | 0.67947 |

|    |      |      |              |              |         |         |
|----|------|------|--------------|--------------|---------|---------|
| 80 | 1.2  | 2.8  | -            | -184.3952378 | -       | 0.68627 |
| 80 | 1.2  | 2.9  | -            | -184.3948761 | -       | 0.69611 |
| 80 | 1.2  | 3    | -            | -184.3944521 | -       | 0.70765 |
| 80 | 1.25 | 1    | -184.1152878 | -184.0580017 | 8.30371 | 9.86246 |
| 80 | 1.25 | 1.05 | -184.1812428 | -184.0727008 | 6.50907 | 9.4625  |
| 80 | 1.25 | 1.1  | -184.2280636 | -184.192656  | 5.23508 | 6.19852 |
| 80 | 1.25 | 1.15 | -184.2606829 | -184.2316702 | 4.34751 | 5.13694 |
| 80 | 1.25 | 1.2  | -184.2827554 | -184.2559798 | 3.74692 | 4.47548 |
| 80 | 1.25 | 1.25 | -184.297011  | -184.2797673 | 3.35902 | 3.82822 |
| 80 | 1.25 | 1.3  | -184.305493  | -184.297749  | 3.12823 | 3.33894 |
| 80 | 1.25 | 1.35 | -184.3097063 | -184.3113434 | 3.01358 | 2.96904 |
| 80 | 1.25 | 1.4  | -184.3107621 | -184.3216548 | 2.98485 | 2.68846 |
| 80 | 1.25 | 1.45 | -184.3094777 | -184.3295461 | 3.0198  | 2.47374 |
| 80 | 1.25 | 1.5  | -184.3064604 | -184.3356913 | 3.1019  | 2.30653 |
| 80 | 1.25 | 1.55 | -184.3021737 | -            | 3.21854 | -       |
| 80 | 1.25 | 1.6  | -184.2969853 | -            | 3.35972 | -       |
| 80 | 1.25 | 1.65 | -184.2912131 | -            | 3.51678 | -       |
| 80 | 1.25 | 1.7  | -184.2851456 | -            | 3.68188 | -       |
| 80 | 1.25 | 1.75 | -184.2790514 | -            | 3.8477  | -       |
| 80 | 1.25 | 1.8  | -184.2731564 | -            | 4.0081  | -       |
| 80 | 1.25 | 1.85 | -184.2676557 | -            | 4.15778 | -       |
| 80 | 1.25 | 1.9  | -184.2626919 | -            | 4.29284 | -       |
| 80 | 1.25 | 1.95 | -184.2583514 | -            | 4.41095 | -       |
| 80 | 1.25 | 2    | -184.2546644 | -            | 4.51127 | -       |
| 80 | 1.3  | 1    | -184.1253082 | -184.0732098 | 8.03105 | 9.44865 |
| 80 | 1.3  | 1.05 | -184.1878559 | -184.0789581 | 6.32913 | 9.29224 |
| 80 | 1.3  | 1.1  | -184.2317523 | -184.2043243 | 5.13471 | 5.88102 |
| 80 | 1.3  | 1.15 | -184.2618707 | -184.2411328 | 4.31519 | 4.87947 |
| 80 | 1.3  | 1.2  | -184.2817739 | -184.2630617 | 3.77362 | 4.28278 |
| 80 | 1.3  | 1.25 | -184.2941123 | -184.2845651 | 3.43789 | 3.69767 |
| 80 | 1.3  | 1.3  | -184.3008792 | -184.3003605 | 3.25377 | 3.26788 |
| 80 | 1.3  | 1.35 | -184.3035721 | -184.3118689 | 3.18049 | 2.95474 |
| 80 | 1.3  | 1.4  | -184.3032869 | -184.3201762 | 3.18825 | 2.7287  |
| 80 | 1.3  | 1.45 | -184.3008201 | -184.3261165 | 3.25537 | 2.56706 |
| 80 | 1.3  | 1.5  | -184.2967488 | -184.330332  | 3.36615 | 2.45235 |
| 80 | 1.3  | 1.55 | -184.2914975 | -            | 3.50904 | -       |
| 80 | 1.3  | 1.6  | -184.2853896 | -            | 3.67524 | -       |
| 80 | 1.3  | 1.65 | -184.2787    | -            | 3.85726 | -       |
| 80 | 1.3  | 1.7  | -184.2716897 | -            | 4.04801 | -       |
| 80 | 1.3  | 1.75 | -184.264604  | -            | 4.24082 | -       |
| 80 | 1.3  | 1.8  | -184.2576814 | -            | 4.42918 | -       |
| 80 | 1.3  | 1.85 | -184.2511325 | -            | 4.60737 | -       |
| 80 | 1.3  | 1.9  | -184.2451304 | -            | 4.77069 | -       |
| 80 | 1.3  | 1.95 | -184.2397983 | -            | 4.91578 | -       |
| 80 | 1.3  | 2    | -184.2352021 | -            | 5.04084 | -       |
| 80 | 1.35 | 1    | -184.1313307 | -184.0861236 | 7.86718 | 9.09727 |
| 80 | 1.35 | 1.05 | -184.1905998 | -184.0812327 | 6.25447 | 9.23035 |
| 80 | 1.35 | 1.1  | -184.2316935 | -184.2110976 | 5.13631 | 5.69672 |
| 80 | 1.35 | 1.15 | -184.2594717 | -184.2456973 | 4.38046 | 4.75527 |
| 80 | 1.35 | 1.2  | -184.2774309 | -184.2668681 | 3.8918  | 4.17921 |
| 80 | 1.35 | 1.25 | -184.2881151 | -184.2860776 | 3.60108 | 3.65652 |
| 80 | 1.35 | 1.3  | -184.2934162 | -184.29971   | 3.45683 | 3.28558 |
| 80 | 1.35 | 1.35 | -184.2947788 | -184.3091866 | 3.41976 | 3.02772 |
| 80 | 1.35 | 1.4  | -184.2933028 | -184.3155813 | 3.45992 | 2.85372 |
| 80 | 1.35 | 1.45 | -184.2897905 | -184.3197048 | 3.55549 | 2.74152 |
| 80 | 1.35 | 1.5  | -184.2848068 | -184.3221674 | 3.6911  | 2.67451 |
| 80 | 1.35 | 1.55 | -184.2787448 | -            | 3.85604 | -       |
| 80 | 1.35 | 1.6  | -184.2718835 | -            | 4.04274 | -       |
| 80 | 1.35 | 1.65 | -184.2644395 | -            | 4.24529 | -       |
| 80 | 1.35 | 1.7  | -184.2566262 | -            | 4.45789 | -       |
| 80 | 1.35 | 1.75 | -184.2486708 | -            | 4.67436 | -       |
| 80 | 1.35 | 1.8  | -184.240806  | -            | 4.88836 | -       |
| 80 | 1.35 | 1.85 | -184.233255  | -            | 5.09382 | -       |
| 80 | 1.35 | 1.9  | -184.22622   | -            | 5.28524 | -       |
| 80 | 1.35 | 1.95 | -184.2198619 | -            | 5.45825 | -       |
| 80 | 1.35 | 2    | -184.2142841 | -            | 5.61002 | -       |
| 80 | 1.4  | 1    | -184.1345733 | -184.1014714 | 7.77895 | 8.67965 |
| 80 | 1.4  | 1.05 | -184.1906837 | -184.0807466 | 6.25219 | 9.24357 |
| 80 | 1.4  | 1.1  | -184.2290508 | -184.2146533 | 5.20822 | 5.59997 |
| 80 | 1.4  | 1.15 | -184.254564  | -184.24728   | 4.514   | 4.7122  |
| 80 | 1.4  | 1.2  | -184.2707113 | -184.2684872 | 4.07463 | 4.13515 |
| 80 | 1.4  | 1.25 | -184.2799833 | -184.2855045 | 3.82234 | 3.67211 |
| 80 | 1.4  | 1.3  | -184.2841594 | -184.2970779 | 3.70871 | 3.3572  |



|    |      |      |              |              |         |         |
|----|------|------|--------------|--------------|---------|---------|
| 80 | 1.4  | 1.35 | -184.2845485 | -184.3046195 | 3.69812 | 3.15199 |
| 80 | 1.4  | 1.4  | -184.2821743 | -184.3091963 | 3.76273 | 3.02746 |
| 80 | 1.4  | 1.45 | -184.2778469 | -184.3116069 | 3.88047 | 2.96186 |
| 80 | 1.4  | 1.5  | -184.2721602 | -184.3124425 | 4.03521 | 2.93913 |
| 80 | 1.4  | 1.55 | -184.2655049 | -            | 4.2163  | -       |
| 80 | 1.4  | 1.6  | -184.2581159 | -            | 4.41735 | -       |
| 80 | 1.4  | 1.65 | -184.2501415 | -            | 4.63434 | -       |
| 80 | 1.4  | 1.7  | -184.2417164 | -            | 4.86359 | -       |
| 80 | 1.4  | 1.75 | -184.2330235 | -            | 5.10012 | -       |
| 80 | 1.4  | 1.8  | -184.2242838 | -            | 5.33793 | -       |
| 80 | 1.4  | 1.85 | -184.2157402 | -            | 5.5704  | -       |
| 80 | 1.4  | 1.9  | -184.207641  | -            | 5.79078 | -       |
| 80 | 1.4  | 1.95 | -184.2001765 | -            | 5.99389 | -       |
| 80 | 1.4  | 2    | -184.193514  | -            | 6.17517 | -       |
| 80 | 1.45 | 1    | -184.1359089 | -184.1122377 | 7.74261 | 8.3867  |
| 80 | 1.45 | 1.05 | -184.188996  | -184.0787335 | 6.29811 | 9.29835 |
| 80 | 1.45 | 1.1  | -184.2246975 | -184.2160171 | 5.32667 | 5.56287 |
| 80 | 1.45 | 1.15 | -184.2479602 | -184.2468061 | 4.69369 | 4.72509 |
| 80 | 1.45 | 1.2  | -184.2623026 | -184.2686711 | 4.30344 | 4.13015 |
| 80 | 1.45 | 1.25 | -184.270224  | -184.2836697 | 4.08789 | 3.72204 |
| 80 | 1.45 | 1.3  | -184.2734809 | -184.2933565 | 3.99927 | 3.45846 |
| 80 | 1.45 | 1.35 | -184.2732917 | -184.2991198 | 4.00442 | 3.30164 |
| 80 | 1.45 | 1.4  | -184.2705212 | -184.3020139 | 4.07981 | 3.22289 |
| 80 | 1.45 | 1.45 | -184.2658571 | -184.3028299 | 4.20672 | 3.20069 |
| 80 | 1.45 | 1.5  | -184.2598848 | -184.3021495 | 4.36922 | 3.2192  |
| 80 | 1.45 | 1.55 | -184.2530268 | -            | 4.55583 | -       |
| 80 | 1.45 | 1.6  | -184.245513  | -            | 4.76028 | -       |
| 80 | 1.45 | 1.65 | -184.2374202 | -            | 4.98049 | -       |
| 80 | 1.45 | 1.7  | -184.2287797 | -            | 5.21559 | -       |
| 80 | 1.45 | 1.75 | -184.219668  | -            | 5.46352 | -       |
| 80 | 1.45 | 1.8  | -184.2102705 | -            | 5.71923 | -       |
| 80 | 1.45 | 1.85 | -184.2008374 | -            | 5.9759  | -       |
| 80 | 1.45 | 1.9  | -184.1916605 | -            | 6.22561 | -       |
| 80 | 1.45 | 1.95 | -184.1830127 | -            | 6.46091 | -       |
| 80 | 1.45 | 2    | -184.1751293 | -            | 6.67542 | -       |
| 80 | 1.5  | 1    | -184.1359443 | -184.1215999 | 7.74164 | 8.13196 |
| 80 | 1.5  | 1.05 | -184.1861796 | -184.0756405 | 6.37474 | 9.38251 |
| 80 | 1.5  | 1.1  | -184.2192945 | -184.2158458 | 5.47369 | 5.56752 |
| 80 | 1.5  | 1.15 | -184.2403049 | -184.2449032 | 4.90199 | 4.77687 |
| 80 | 1.5  | 1.2  | -184.2527809 | -184.2679314 | 4.56252 | 4.15028 |
| 80 | 1.5  | 1.25 | -184.2592573 | -184.2811061 | 4.3863  | 3.79179 |
| 80 | 1.5  | 1.3  | -184.2615203 | -184.2891037 | 4.32472 | 3.57418 |
| 80 | 1.5  | 1.35 | -184.2608146 | -184.2932798 | 4.34392 | 3.46055 |
| 80 | 1.5  | 1.4  | -184.2579581 | -184.2946674 | 4.42165 | 3.42279 |
| 80 | 1.5  | 1.45 | -184.2534914 | -184.2940431 | 4.54319 | 3.43978 |
| 80 | 1.5  | 1.5  | -184.2478379 | -184.2919875 | 4.69702 | 3.49571 |
| 80 | 1.5  | 1.55 | -184.2413487 | -            | 4.87359 | -       |
| 80 | 1.5  | 1.6  | -184.2342441 | -            | 5.06691 | -       |
| 80 | 1.5  | 1.65 | -184.2265551 | -            | 5.27612 | -       |
| 80 | 1.5  | 1.7  | -184.2182036 | -            | 5.50337 | -       |
| 80 | 1.5  | 1.75 | -184.2091483 | -            | 5.74976 | -       |
| 80 | 1.5  | 1.8  | -184.1994832 | -            | 6.01275 | -       |
| 80 | 1.5  | 1.85 | -184.1894508 | -            | 6.28573 | -       |
| 80 | 1.5  | 1.9  | -184.1793971 | -            | 6.55929 | -       |
| 80 | 1.5  | 1.95 | -184.1696934 | -            | 6.82333 | -       |
| 80 | 1.5  | 2    | -184.1607021 | -            | 7.06799 | -       |
| 85 | 1    | 1.6  | -            | -184.2915732 | -       | 3.50698 |
| 85 | 1    | 1.7  | -            | -184.3152577 | -       | 2.86253 |
| 85 | 1    | 1.8  | -            | -184.3339893 | -       | 2.35284 |
| 85 | 1    | 1.9  | -            | -184.3482037 | -       | 1.96607 |
| 85 | 1    | 2    | -            | -184.3586174 | -       | 1.68271 |
| 85 | 1    | 2.1  | -            | -184.3660134 | -       | 1.48146 |
| 85 | 1    | 2.2  | -            | -184.3711081 | -       | 1.34284 |
| 85 | 1    | 2.3  | -            | -184.3744989 | -       | 1.25057 |
| 85 | 1    | 2.4  | -            | -184.3766579 | -       | 1.19183 |
| 85 | 1    | 2.5  | -            | -184.3779462 | -       | 1.15677 |
| 85 | 1    | 2.6  | -            | -184.3786318 | -       | 1.13812 |
| 85 | 1    | 2.7  | -            | -184.3789099 | -       | 1.13055 |
| 85 | 1    | 2.8  | -            | -184.3789185 | -       | 1.13032 |
| 85 | 1    | 2.9  | -            | -184.3787537 | -       | 1.1348  |
| 85 | 1    | 3    | -            | -184.3784825 | -       | 1.14218 |
| 85 | 1.05 | 1.6  | -            | -184.3323356 | -       | 2.39784 |
| 85 | 1.05 | 1.7  | -            | -184.3518391 | -       | 1.86715 |

|    |      |      |              |              |         |         |
|----|------|------|--------------|--------------|---------|---------|
| 85 | 1.05 | 1.8  | -            | -184.3676615 | -       | 1.43662 |
| 85 | 1.05 | 1.9  | -            | -184.3799212 | -       | 1.10303 |
| 85 | 1.05 | 2    | -            | -184.3890317 | -       | 0.85514 |
| 85 | 1.05 | 2.1  | -            | -184.3955596 | -       | 0.67751 |
| 85 | 1.05 | 2.2  | -            | -184.4000727 | -       | 0.55471 |
| 85 | 1.05 | 2.3  | -            | -184.4030722 | -       | 0.47309 |
| 85 | 1.05 | 2.4  | -            | -184.4049662 | -       | 0.42156 |
| 85 | 1.05 | 2.5  | -            | -184.4060735 | -       | 0.39143 |
| 85 | 1.05 | 2.6  | -            | -184.406634  | -       | 0.37618 |
| 85 | 1.05 | 2.7  | -            | -184.4068243 | -       | 0.371   |
| 85 | 1.05 | 2.8  | -            | -184.4067699 | -       | 0.37248 |
| 85 | 1.05 | 2.9  | -            | -184.4065594 | -       | 0.37821 |
| 85 | 1.05 | 3    | -            | -184.4062547 | -       | 0.3865  |
| 85 | 1.1  | 1.6  | -            | -184.3547518 | -       | 1.78789 |
| 85 | 1.1  | 1.7  | -            | -184.3700175 | -       | 1.37251 |
| 85 | 1.1  | 1.8  | -            | -184.3827961 | -       | 1.02481 |
| 85 | 1.1  | 1.9  | -            | -184.3929791 | -       | 0.74773 |
| 85 | 1.1  | 2    | -            | -184.4006909 | -       | 0.53789 |
| 85 | 1.1  | 2.1  | -            | -184.4062693 | -       | 0.3861  |
| 85 | 1.1  | 2.2  | -            | -184.4101334 | -       | 0.28096 |
| 85 | 1.1  | 2.3  | -            | -184.4126842 | -       | 0.21155 |
| 85 | 1.1  | 2.4  | -            | -184.4142681 | -       | 0.16845 |
| 85 | 1.1  | 2.5  | -            | -184.4151594 | -       | 0.1442  |
| 85 | 1.1  | 2.6  | -            | -184.415568  | -       | 0.13308 |
| 85 | 1.1  | 2.7  | -            | -184.4156505 | -       | 0.13084 |
| 85 | 1.1  | 2.8  | -            | -184.415519  | -       | 0.13442 |
| 85 | 1.1  | 2.9  | -            | -184.4152516 | -       | 0.14169 |
| 85 | 1.1  | 3    | -            | -184.4149053 | -       | 0.15112 |
| 85 | 1.15 | 1.6  | -            | -184.364048  | -       | 1.53494 |
| 85 | 1.15 | 1.7  | -            | -184.375063  | -       | 1.23523 |
| 85 | 1.15 | 1.8  | -            | -184.3846047 | -       | 0.97559 |
| 85 | 1.15 | 1.9  | -            | -184.3925001 | -       | 0.76076 |
| 85 | 1.15 | 2    | -            | -184.3986491 | -       | 0.59345 |
| 85 | 1.15 | 2.1  | -            | -184.4031768 | -       | 0.47025 |
| 85 | 1.15 | 2.2  | -            | -184.4063395 | -       | 0.38419 |
| 85 | 1.15 | 2.3  | -            | -184.4084244 | -       | 0.32746 |
| 85 | 1.15 | 2.4  | -            | -184.4096948 | -       | 0.29289 |
| 85 | 1.15 | 2.5  | -            | -184.410862  | -       | 0.26113 |
| 85 | 1.15 | 2.6  | -            | -184.411116  | -       | 0.25422 |
| 85 | 1.15 | 2.7  | -            | -184.4110794 | -       | 0.25522 |
| 85 | 1.15 | 2.8  | -            | -184.4108587 | -       | 0.26122 |
| 85 | 1.15 | 2.9  | -            | -184.4105269 | -       | 0.27025 |
| 85 | 1.15 | 3    | -            | -184.4101307 | -       | 0.28103 |
| 85 | 1.2  | 1.6  | -            | -184.3641858 | -       | 1.53119 |
| 85 | 1.2  | 1.7  | -            | -184.3710962 | -       | 1.34316 |
| 85 | 1.2  | 1.8  | -            | -184.3773166 | -       | 1.1739  |
| 85 | 1.2  | 1.9  | -            | -184.3827499 | -       | 1.02607 |
| 85 | 1.2  | 2    | -            | -184.3871508 | -       | 0.90632 |
| 85 | 1.2  | 2.1  | -            | -184.3904543 | -       | 0.81643 |
| 85 | 1.2  | 2.2  | -            | -184.3927604 | -       | 0.75368 |
| 85 | 1.2  | 2.3  | -            | -184.394243  | -       | 0.71334 |
| 85 | 1.2  | 2.4  | -            | -184.3950913 | -       | 0.69025 |
| 85 | 1.2  | 2.5  | -            | -184.3954702 | -       | 0.67995 |
| 85 | 1.2  | 2.6  | -            | -184.3955227 | -       | 0.67852 |
| 85 | 1.2  | 2.7  | -            | -184.3953506 | -       | 0.6832  |
| 85 | 1.2  | 2.8  | -            | -184.3950385 | -       | 0.69169 |
| 85 | 1.2  | 2.9  | -            | -184.3946421 | -       | 0.70248 |
| 85 | 1.2  | 3    | -            | -184.3942006 | -       | 0.71449 |
| 90 | 1    | 1    | -183.9566153 | -183.908008  | 12.6212 | 13.9438 |
| 90 | 1    | 1.05 | -184.0354192 | -183.9961785 | 10.4769 | 11.5447 |
| 90 | 1    | 1.1  | -184.0934133 | -184.0633445 | 8.89891 | 9.71709 |
| 90 | 1    | 1.15 | -184.1359447 | -184.1151705 | 7.74163 | 8.3069  |
| 90 | 1    | 1.2  | -184.166996  | -184.1554337 | 6.89673 | 7.21134 |
| 90 | 1    | 1.25 | -184.1895322 | -184.1870821 | 6.28352 | 6.35019 |
| 90 | 1    | 1.3  | -184.2057664 | -184.2124037 | 5.84179 | 5.66118 |
| 90 | 1    | 1.35 | -184.2173472 | -184.2331615 | 5.52667 | 5.09636 |
| 90 | 1    | 1.4  | -184.2255002 | -184.2506904 | 5.30483 | 4.6194  |
| 90 | 1    | 1.45 | -184.2311372 | -184.2659628 | 5.15145 | 4.20384 |
| 90 | 1    | 1.5  | -184.2349374 | -184.2796368 | 5.04804 | 3.83177 |
| 90 | 1    | 1.55 | -184.2374108 | -            | 4.98074 | -       |
| 90 | 1    | 1.6  | -184.2389434 | -184.303545  | 4.93904 | 3.18123 |
| 90 | 1    | 1.65 | -184.2398303 | -            | 4.91491 | -       |
| 90 | 1    | 1.7  | -184.2402949 | -184.3235268 | 4.90226 | 2.63752 |

|    |      |      |              |              |         |         |
|----|------|------|--------------|--------------|---------|---------|
| 90 | 1    | 1.75 | -184.240505  | -            | 4.89655 | -       |
| 90 | 1    | 1.8  | -184.2405822 | -184.3396209 | 4.89445 | 2.1996  |
| 90 | 1    | 1.85 | -184.2406094 | -            | 4.89371 | -       |
| 90 | 1    | 1.9  | -184.2406389 | -184.3519995 | 4.8929  | 1.86278 |
| 90 | 1    | 1.95 | -184.2407023 | -            | 4.89118 | -       |
| 90 | 1    | 2    | -184.2408068 | -184.3611357 | 4.88834 | 1.61419 |
| 90 | 1    | 2.1  | -            | -184.3676392 | -       | 1.43723 |
| 90 | 1    | 2.2  | -            | -184.3721098 | -       | 1.31558 |
| 90 | 1    | 2.3  | -            | -184.3750667 | -       | 1.23513 |
| 90 | 1    | 2.4  | -            | -184.3769279 | -       | 1.18448 |
| 90 | 1    | 2.5  | -            | -184.3780158 | -       | 1.15488 |
| 90 | 1    | 2.6  | -            | -184.3785703 | -       | 1.13979 |
| 90 | 1    | 2.7  | -            | -184.3787658 | -       | 1.13447 |
| 90 | 1    | 2.8  | -            | -184.378725  | -       | 1.13558 |
| 90 | 1    | 2.9  | -            | -184.3785333 | -       | 1.1408  |
| 90 | 1    | 3    | -            | -184.3782501 | -       | 1.1485  |
| 90 | 1.05 | 1    | -184.0228785 | -183.9841521 | 10.8182 | 11.8719 |
| 90 | 1.05 | 1.05 | -184.0976913 | -184.0687898 | 8.78251 | 9.56892 |
| 90 | 1.05 | 1.1  | -184.1520832 | -184.1329925 | 7.30251 | 7.82196 |
| 90 | 1.05 | 1.15 | -184.1913553 | -184.1817797 | 6.23391 | 6.49446 |
| 90 | 1.05 | 1.2  | -184.2194403 | -184.2190044 | 5.46972 | 5.48158 |
| 90 | 1.05 | 1.25 | -184.2392638 | -184.247629  | 4.93032 | 4.7027  |
| 90 | 1.05 | 1.3  | -184.2530008 | -184.2699334 | 4.55654 | 4.0958  |
| 90 | 1.05 | 1.35 | -184.2622718 | -184.287669  | 4.30427 | 3.61322 |
| 90 | 1.05 | 1.4  | -184.2682846 | -184.3021724 | 4.14067 | 3.21858 |
| 90 | 1.05 | 1.45 | -184.2719433 | -184.3144449 | 4.04111 | 2.88464 |
| 90 | 1.05 | 1.5  | -184.2739284 | -184.3252055 | 3.9871  | 2.59185 |
| 90 | 1.05 | 1.55 | -184.2747549 | -            | 3.96461 | -       |
| 90 | 1.05 | 1.6  | -184.2748133 | -184.343883  | 3.96302 | 2.08363 |
| 90 | 1.05 | 1.65 | -184.2743991 | -            | 3.97429 | -       |
| 90 | 1.05 | 1.7  | -184.2737328 | -184.3598239 | 3.99242 | 1.64988 |
| 90 | 1.05 | 1.75 | -184.2729744 | -            | 4.01306 | -       |
| 90 | 1.05 | 1.8  | -184.2722268 | -184.3730817 | 4.0334  | 1.28914 |
| 90 | 1.05 | 1.85 | -184.2715633 | -            | 4.05145 | -       |
| 90 | 1.05 | 1.9  | -184.2710171 | -184.3835557 | 4.06632 | 1.00414 |
| 90 | 1.05 | 1.95 | -184.2706014 | -            | 4.07763 | -       |
| 90 | 1.05 | 2    | -184.2703111 | -184.3914291 | 4.08552 | 0.7899  |
| 90 | 1.05 | 2.1  | -            | -184.3970955 | -       | 0.63572 |
| 90 | 1.05 | 2.2  | -            | -184.4010088 | -       | 0.52924 |
| 90 | 1.05 | 2.3  | -            | -184.4035919 | -       | 0.45895 |
| 90 | 1.05 | 2.4  | -            | -184.4052006 | -       | 0.41518 |
| 90 | 1.05 | 2.5  | -            | -184.4061163 | -       | 0.39027 |
| 90 | 1.05 | 2.6  | -            | -184.4065515 | -       | 0.37842 |
| 90 | 1.05 | 2.7  | -            | -184.406663  | -       | 0.37539 |
| 90 | 1.05 | 2.8  | -            | -184.4065622 | -       | 0.37813 |
| 90 | 1.05 | 2.9  | -            | -184.4063261 | -       | 0.38456 |
| 90 | 1.05 | 3    | -            | -184.4060106 | -       | 0.39314 |
| 90 | 1.1  | 1    | -184.0690857 | -184.0402499 | 9.56087 | 10.3455 |
| 90 | 1.1  | 1.05 | -184.1401316 | -184.1216319 | 7.62771 | 8.13109 |
| 90 | 1.1  | 1.1  | -184.1911267 | -184.1825921 | 6.24013 | 6.47236 |
| 90 | 1.1  | 1.15 | -184.2273332 | -184.2282518 | 5.25495 | 5.22996 |
| 90 | 1.1  | 1.2  | -184.252634  | -184.2624801 | 4.56652 | 4.2986  |
| 90 | 1.1  | 1.25 | -184.2699152 | -184.288218  | 4.0963  | 3.59828 |
| 90 | 1.1  | 1.3  | -184.2813157 | -184.3077127 | 3.78609 | 3.06783 |
| 90 | 1.1  | 1.35 | -184.2884225 | -184.3226854 | 3.59271 | 2.66042 |
| 90 | 1.1  | 1.4  | -184.2924166 | -184.3344514 | 3.48403 | 2.34027 |
| 90 | 1.1  | 1.45 | -184.2941846 | -184.3440079 | 3.43593 | 2.08024 |
| 90 | 1.1  | 1.5  | -184.2944001 | -184.3520981 | 3.43006 | 1.8601  |
| 90 | 1.1  | 1.55 | -184.2935827 | -            | 3.45231 | -       |
| 90 | 1.1  | 1.6  | -184.292132  | -184.3657975 | 3.49178 | 1.48734 |
| 90 | 1.1  | 1.65 | -184.2903553 | -            | 3.54012 | -       |
| 90 | 1.1  | 1.7  | -184.2884824 | -184.3776745 | 3.59108 | 1.16417 |
| 90 | 1.1  | 1.75 | -184.2866717 | -            | 3.64035 | -       |
| 90 | 1.1  | 1.8  | -184.2850274 | -184.3879768 | 3.68509 | 0.88384 |
| 90 | 1.1  | 1.85 | -184.2836061 | -            | 3.72377 | -       |
| 90 | 1.1  | 1.9  | -184.2824263 | -184.3964257 | 3.75587 | 0.65395 |
| 90 | 1.1  | 1.95 | -184.2814921 | -            | 3.78129 | -       |
| 90 | 1.1  | 2    | -184.2807742 | -184.4029422 | 3.80082 | 0.47663 |
| 90 | 1.1  | 2.1  | -            | -184.4076957 | -       | 0.34729 |
| 90 | 1.1  | 2.2  | -            | -184.41099   | -       | 0.25765 |
| 90 | 1.1  | 2.3  | -            | -184.4131479 | -       | 0.19894 |
| 90 | 1.1  | 2.4  | -            | -184.4144629 | -       | 0.16315 |
| 90 | 1.1  | 2.5  | -            | -184.4151732 | -       | 0.14383 |

|    |      |      |              |              |         |         |
|----|------|------|--------------|--------------|---------|---------|
| 90 | 1.1  | 2.6  | -            | -184.4154643 | -       | 0.13591 |
| 90 | 1.1  | 2.7  | -            | -184.415473  | -       | 0.13567 |
| 90 | 1.1  | 2.8  | -            | -184.415298  | -       | 0.14043 |
| 90 | 1.1  | 2.9  | -            | -184.4150083 | -       | 0.14831 |
| 90 | 1.1  | 3    | -            | -184.4146524 | -       | 0.158   |
| 90 | 1.15 | 1    | -184.100653  | -184.0816482 | 8.70192 | 9.21904 |
| 90 | 1.15 | 1.05 | -184.1681613 | -184.1594954 | 6.86502 | 7.10082 |
| 90 | 1.15 | 1.1  | -184.2159844 | -184.2170854 | 5.56375 | 5.5338  |
| 90 | 1.15 | 1.15 | -184.2493364 | -184.2596188 | 4.65625 | 4.37646 |
| 90 | 1.15 | 1.2  | -184.2720613 | -184.2909469 | 4.0379  | 3.52403 |
| 90 | 1.15 | 1.25 | -184.2869995 | -184.3139659 | 3.63143 | 2.89768 |
| 90 | 1.15 | 1.3  | -184.296252  | -184.3308741 | 3.37967 | 2.4376  |
| 90 | 1.15 | 1.35 | -184.3013716 | -184.343346  | 3.24037 | 2.09825 |
| 90 | 1.15 | 1.4  | -184.3035077 | -184.3526604 | 3.18225 | 1.8448  |
| 90 | 1.15 | 1.45 | -184.3035191 | -184.3597915 | 3.18193 | 1.65076 |
| 90 | 1.15 | 1.5  | -184.3020614 | -184.3654765 | 3.2216  | 1.49608 |
| 90 | 1.15 | 1.55 | -184.2996476 | -            | 3.28728 | -       |
| 90 | 1.15 | 1.6  | -184.2966893 | -184.3745387 | 3.36777 | 1.24949 |
| 90 | 1.15 | 1.65 | -184.2935077 | -            | 3.45434 | -       |
| 90 | 1.15 | 1.7  | -184.2903547 | -184.3823776 | 3.54014 | 1.0362  |
| 90 | 1.15 | 1.75 | -184.287404  | -            | 3.62043 | -       |
| 90 | 1.15 | 1.8  | -184.284769  | -184.3895597 | 3.69213 | 0.84077 |
| 90 | 1.15 | 1.85 | -184.2825054 | -            | 3.75372 | -       |
| 90 | 1.15 | 1.9  | -184.2806247 | -184.3957882 | 3.80489 | 0.67129 |
| 90 | 1.15 | 1.95 | -184.2791046 | -            | 3.84625 | -       |
| 90 | 1.15 | 2    | -184.2779173 | -184.4007826 | 3.87856 | 0.5354  |
| 90 | 1.15 | 2.1  | -            | -184.4045141 | -       | 0.43386 |
| 90 | 1.15 | 2.2  | -            | -184.407127  | -       | 0.36276 |
| 90 | 1.15 | 2.3  | -            | -184.4088339 | -       | 0.31632 |
| 90 | 1.15 | 2.4  | -            | -184.4098493 | -       | 0.28869 |
| 90 | 1.15 | 2.5  | -            | -184.4103612 | -       | 0.27476 |
| 90 | 1.15 | 2.6  | -            | -184.4109503 | -       | 0.25873 |
| 90 | 1.15 | 2.7  | -            | -184.4108707 | -       | 0.2609  |
| 90 | 1.15 | 2.8  | -            | -184.4106206 | -       | 0.2677  |
| 90 | 1.15 | 2.9  | -            | -184.4102718 | -       | 0.27719 |
| 90 | 1.15 | 3    | -            | -184.4098706 | -       | 0.28811 |
| 90 | 1.2  | 1    | -184.1215878 | -184.1119547 | 8.13228 | 8.3944  |
| 90 | 1.2  | 1.05 | -184.1857684 | -184.1861753 | 6.38593 | 6.37486 |
| 90 | 1.2  | 1.1  | -184.2306314 | -184.2404044 | 5.16521 | 4.89929 |
| 90 | 1.2  | 1.15 | -184.261354  | -184.2798959 | 4.32925 | 3.82472 |
| 90 | 1.2  | 1.2  | -184.2817346 | -184.3084455 | 3.77469 | 3.04789 |
| 90 | 1.2  | 1.25 | -184.294562  | -184.3289004 | 3.42566 | 2.49131 |
| 90 | 1.2  | 1.3  | -184.3018892 | -184.3434114 | 3.22628 | 2.09646 |
| 90 | 1.2  | 1.35 | -184.3052306 | -184.353605  | 3.13537 | 1.8191  |
| 90 | 1.2  | 1.4  | -184.3057022 | -184.360716  | 3.12253 | 1.62561 |
| 90 | 1.2  | 1.45 | -184.3041312 | -184.3656845 | 3.16528 | 1.49041 |
| 90 | 1.2  | 1.5  | -184.3011439 | -184.3692257 | 3.24657 | 1.39406 |
| 90 | 1.2  | 1.55 | -184.2972354 | -            | 3.35292 | -       |
| 90 | 1.2  | 1.6  | -184.2928176 | -184.3740679 | 3.47312 | 1.2623  |
| 90 | 1.2  | 1.65 | -184.2882254 | -            | 3.59808 | -       |
| 90 | 1.2  | 1.7  | -184.2837354 | -184.3780252 | 3.72025 | 1.15462 |
| 90 | 1.2  | 1.75 | -184.2795561 | -            | 3.83397 | -       |
| 90 | 1.2  | 1.8  | -184.2758253 | -184.3820238 | 3.93548 | 1.04582 |
| 90 | 1.2  | 1.85 | -184.2726128 | -            | 4.0229  | -       |
| 90 | 1.2  | 1.9  | -184.2699323 | -184.3858758 | 4.09583 | 0.94101 |
| 90 | 1.2  | 1.95 | -184.2677545 | -            | 4.15509 | -       |
| 90 | 1.2  | 2    | -184.2660284 | -184.389176  | 4.20206 | 0.85121 |
| 90 | 1.2  | 2.1  | -            | -184.3917197 | -       | 0.782   |
| 90 | 1.2  | 2.2  | -            | -184.3935018 | -       | 0.7335  |
| 90 | 1.2  | 2.3  | -            | -184.3946252 | -       | 0.70294 |
| 90 | 1.2  | 2.4  | -            | -184.3952266 | -       | 0.68657 |
| 90 | 1.2  | 2.5  | -            | -184.3954428 | -       | 0.68069 |
| 90 | 1.2  | 2.6  | -            | -184.3953876 | -       | 0.68219 |
| 90 | 1.2  | 2.7  | -            | -184.3951517 | -       | 0.68861 |
| 90 | 1.2  | 2.8  | -            | -184.3948013 | -       | 0.69815 |
| 90 | 1.2  | 2.9  | -            | -184.3943853 | -       | 0.70947 |
| 90 | 1.2  | 3    | -            | -184.3939371 | -       | 0.72166 |
| 90 | 1.25 | 1    | -184.1348579 | -184.1340155 | 7.77121 | 7.79413 |
| 90 | 1.25 | 1.05 | -184.1958928 | -184.20466   | 6.11045 | 5.87189 |
| 90 | 1.25 | 1.1  | -184.2379747 | -184.2556351 | 4.9654  | 4.48486 |
| 90 | 1.25 | 1.15 | -184.266263  | -184.2922297 | 4.19567 | 3.48912 |
| 90 | 1.25 | 1.2  | -184.2845287 | -184.3181474 | 3.69866 | 2.7839  |
| 90 | 1.25 | 1.25 | -184.2955058 | -184.3361911 | 3.39998 | 2.29293 |

|    |      |      |              |              |         |         |
|----|------|------|--------------|--------------|---------|---------|
| 90 | 1.25 | 1.3  | -184.3011838 | -184.3484734 | 3.24548 | 1.95873 |
| 90 | 1.25 | 1.35 | -184.3030139 | -184.3565804 | 3.19568 | 1.73814 |
| 90 | 1.25 | 1.4  | -184.302067  | -184.3617037 | 3.22145 | 1.59873 |
| 90 | 1.25 | 1.45 | -184.2991352 | -184.3647438 | 3.30122 | 1.51601 |
| 90 | 1.25 | 1.5  | -184.2948112 | -184.3663855 | 3.41888 | 1.47134 |
| 90 | 1.25 | 1.55 | -184.2895604 | -            | 3.56175 | -       |
| 90 | 1.25 | 1.6  | -184.2837769 | -            | 3.71912 | -       |
| 90 | 1.25 | 1.65 | -184.2778097 | -            | 3.88149 | -       |
| 90 | 1.25 | 1.7  | -184.2719595 | -            | 4.04067 | -       |
| 90 | 1.25 | 1.75 | -184.2664745 | -            | 4.18992 | -       |
| 90 | 1.25 | 1.8  | -184.2615383 | -            | 4.32423 | -       |
| 90 | 1.25 | 1.85 | -184.2572463 | -            | 4.44102 | -       |
| 90 | 1.25 | 1.9  | -184.2536404 | -            | 4.53913 | -       |
| 90 | 1.25 | 1.95 | -184.250693  | -            | 4.61933 | -       |
| 90 | 1.25 | 2    | -184.2483406 | -            | 4.68334 | -       |
| 90 | 1.3  | 1    | -184.1426654 | -184.1500078 | 7.55876 | 7.35898 |
| 90 | 1.3  | 1.05 | -184.2007062 | -184.2172116 | 5.97947 | 5.53036 |
| 90 | 1.3  | 1.1  | -184.2401501 | -184.2650747 | 4.90621 | 4.22801 |
| 90 | 1.3  | 1.15 | -184.2661408 | -184.2989531 | 4.199   | 3.30618 |
| 90 | 1.3  | 1.2  | -184.2824458 | -184.3224042 | 3.75534 | 2.66807 |
| 90 | 1.3  | 1.25 | -184.2917923 | -184.3381904 | 3.50102 | 2.23853 |
| 90 | 1.3  | 1.3  | -184.2961202 | -184.3483985 | 3.38326 | 1.96077 |
| 90 | 1.3  | 1.35 | -184.2967919 | -184.3545842 | 3.36498 | 1.79245 |
| 90 | 1.3  | 1.4  | -184.2947836 | -184.3579015 | 3.41963 | 1.70219 |
| 90 | 1.3  | 1.45 | -184.2908191 | -184.3592122 | 3.5275  | 1.66653 |
| 90 | 1.3  | 1.5  | -184.2854431 | -184.3591663 | 3.67378 | 1.66777 |
| 90 | 1.3  | 1.55 | -184.2790793 | -            | 3.84694 | -       |
| 90 | 1.3  | 1.6  | -184.2720939 | -            | 4.03701 | -       |
| 90 | 1.3  | 1.65 | -184.2648376 | -            | 4.23446 | -       |
| 90 | 1.3  | 1.7  | -184.2576373 | -            | 4.43038 | -       |
| 90 | 1.3  | 1.75 | -184.2507904 | -            | 4.61668 | -       |
| 90 | 1.3  | 1.8  | -184.2445262 | -            | 4.78713 | -       |
| 90 | 1.3  | 1.85 | -184.2390083 | -            | 4.93727 | -       |
| 90 | 1.3  | 1.9  | -184.2343164 | -            | 5.06494 | -       |
| 90 | 1.3  | 1.95 | -184.2304454 | -            | 5.17027 | -       |
| 90 | 1.3  | 2    | -184.2273353 | -            | 5.2549  | -       |
| 90 | 1.35 | 1    | -184.1466382 | -184.1615547 | 7.45066 | 7.04479 |
| 90 | 1.35 | 1.05 | -184.2018246 | -184.2254997 | 5.94904 | 5.30484 |
| 90 | 1.35 | 1.1  | -184.2387336 | -184.2704154 | 4.94475 | 4.08269 |
| 90 | 1.35 | 1.15 | -184.2625053 | -184.3017766 | 4.29792 | 3.22935 |
| 90 | 1.35 | 1.2  | -184.2769117 | -184.3229416 | 3.90592 | 2.65345 |
| 90 | 1.35 | 1.25 | -184.2847072 | -184.3366381 | 3.69381 | 2.28077 |
| 90 | 1.35 | 1.3  | -184.287854  | -184.344928  | 3.60818 | 2.0552  |
| 90 | 1.35 | 1.35 | -184.2876873 | -184.3493438 | 3.61272 | 1.93505 |
| 90 | 1.35 | 1.4  | -184.2850748 | -184.3510108 | 3.6838  | 1.88969 |
| 90 | 1.35 | 1.45 | -184.2805907 | -184.3507571 | 3.80582 | 1.89659 |
| 90 | 1.35 | 1.5  | -184.2746602 | -184.3491993 | 3.96719 | 1.93898 |
| 90 | 1.35 | 1.55 | -184.2676192 | -            | 4.15877 | -       |
| 90 | 1.35 | 1.6  | -184.2597703 | -            | 4.37234 | -       |
| 90 | 1.35 | 1.65 | -184.2514293 | -            | 4.5993  | -       |
| 90 | 1.35 | 1.7  | -184.2429628 | -            | 4.82967 | -       |
| 90 | 1.35 | 1.75 | -184.2347175 | -            | 5.05403 | -       |
| 90 | 1.35 | 1.8  | -184.2270092 | -            | 5.26377 | -       |
| 90 | 1.35 | 1.85 | -184.2200831 | -            | 5.45223 | -       |
| 90 | 1.35 | 1.9  | -184.2140912 | -            | 5.61527 | -       |
| 90 | 1.35 | 1.95 | -184.2090891 | -            | 5.75138 | -       |
| 90 | 1.35 | 2    | -184.2050354 | -            | 5.86168 | -       |
| 90 | 1.4  | 1    | -184.1479669 | -184.1698496 | 7.41451 | 6.81908 |
| 90 | 1.4  | 1.05 | -184.2004347 | -184.2306736 | 5.98686 | 5.16406 |
| 90 | 1.4  | 1.1  | -184.2349071 | -184.2728926 | 5.04887 | 4.01528 |
| 90 | 1.4  | 1.15 | -184.2565135 | -184.3019445 | 4.46096 | 3.22478 |
| 90 | 1.4  | 1.2  | -184.2690245 | -184.321009  | 4.12053 | 2.70603 |
| 90 | 1.4  | 1.25 | -184.2752213 | -184.3327965 | 3.95192 | 2.3853  |
| 90 | 1.4  | 1.3  | -184.2771245 | -184.3393396 | 3.90013 | 2.20726 |
| 90 | 1.4  | 1.35 | -184.2761738 | -184.3421442 | 3.926   | 2.13095 |
| 90 | 1.4  | 1.4  | -184.273197  | -184.3423107 | 4.007   | 2.12642 |
| 90 | 1.4  | 1.45 | -184.2687236 | -184.3406395 | 4.12872 | 2.17189 |
| 90 | 1.4  | 1.5  | -184.2629393 | -184.3377199 | 4.28611 | 2.25133 |
| 90 | 1.4  | 1.55 | -184.2559684 | -            | 4.47579 | -       |
| 90 | 1.4  | 1.6  | -184.2479472 | -            | 4.69405 | -       |
| 90 | 1.4  | 1.65 | -184.2390865 | -            | 4.93515 | -       |
| 90 | 1.4  | 1.7  | -184.2297001 | -            | 5.19055 | -       |
| 90 | 1.4  | 1.75 | -184.2202176 | -            | 5.44857 | -       |

|    |      |      |              |              |         |         |
|----|------|------|--------------|--------------|---------|---------|
| 90 | 1.4  | 1.8  | -184.2110416 | -            | 5.69825 | -       |
| 90 | 1.4  | 1.85 | -184.2025716 | -            | 5.92872 | -       |
| 90 | 1.4  | 1.9  | -184.1950618 | -            | 6.13306 | -       |
| 90 | 1.4  | 1.95 | -184.1886702 | -            | 6.30697 | -       |
| 90 | 1.4  | 2    | -184.1834331 | -            | 6.44947 | -       |
| 90 | 1.45 | 1    | -184.1475149 | -184.1757615 | 7.42681 | 6.65822 |
| 90 | 1.45 | 1.05 | -184.1974114 | -184.2331815 | 6.06913 | 5.09582 |
| 90 | 1.45 | 1.1  | -184.2295498 | -184.2734081 | 5.19464 | 4.00125 |
| 90 | 1.45 | 1.15 | -184.2490457 | -184.3003346 | 4.66416 | 3.26858 |
| 90 | 1.45 | 1.2  | -184.2596597 | -184.3174818 | 4.37535 | 2.80201 |
| 90 | 1.45 | 1.25 | -184.2641756 | -184.327549  | 4.25247 | 2.52808 |
| 90 | 1.45 | 1.3  | -184.2646549 | -184.332532  | 4.23943 | 2.39249 |
| 90 | 1.45 | 1.35 | -184.2626099 | -184.3339013 | 4.29507 | 2.35524 |
| 90 | 1.45 | 1.4  | -184.259108  | -184.3327291 | 4.39036 | 2.38713 |
| 90 | 1.45 | 1.45 | -184.2547167 | -184.3297902 | 4.50985 | 2.4671  |
| 90 | 1.45 | 1.5  | -184.2495571 | -184.3256515 | 4.65024 | 2.57971 |
| 90 | 1.45 | 1.55 | -184.2434609 | -            | 4.81612 | -       |
| 90 | 1.45 | 1.6  | -184.236224  | -            | 5.01303 | -       |
| 90 | 1.45 | 1.65 | -184.2277973 | -            | 5.24233 | -       |
| 90 | 1.45 | 1.7  | -184.2183204 | -            | 5.50019 | -       |
| 90 | 1.45 | 1.75 | -184.2081758 | -            | 5.77623 | -       |
| 90 | 1.45 | 1.8  | -184.1978798 | -            | 6.05638 | -       |
| 90 | 1.45 | 1.85 | -184.1879862 | -            | 6.32559 | -       |
| 90 | 1.45 | 1.9  | -184.1789556 | -            | 6.57131 | -       |
| 90 | 1.45 | 1.95 | -184.1711127 | -            | 6.78471 | -       |
| 90 | 1.45 | 2    | -184.164615  | -            | 6.96151 | -       |
| 90 | 1.5  | 1    | -184.1458947 | -184.1799088 | 7.47089 | 6.54537 |
| 90 | 1.5  | 1.05 | -184.1933856 | -184.2344165 | 6.17867 | 5.06222 |
| 90 | 1.5  | 1.1  | -184.2233083 | -184.2725792 | 5.36447 | 4.02381 |
| 90 | 1.5  | 1.15 | -184.2407653 | -184.2975432 | 4.88946 | 3.34454 |
| 90 | 1.5  | 1.2  | -184.2495035 | -184.3129547 | 4.6517  | 2.92519 |
| 90 | 1.5  | 1.25 | -184.2522928 | -184.3214925 | 4.5758  | 2.69288 |
| 90 | 1.5  | 1.3  | -184.2511918 | -184.325108  | 4.60576 | 2.5945  |
| 90 | 1.5  | 1.35 | -184.2477655 | -184.3252277 | 4.69899 | 2.59124 |
| 90 | 1.5  | 1.4  | -184.2432114 | -184.32289   | 4.82291 | 2.65485 |
| 90 | 1.5  | 1.45 | -184.238366  | -184.3188433 | 4.95475 | 2.76496 |
| 90 | 1.5  | 1.5  | -184.2335853 | -184.3136343 | 5.08483 | 2.9067  |
| 90 | 1.5  | 1.55 | -184.228623  | -            | 5.21986 | -       |
| 90 | 1.5  | 1.6  | -184.2229058 | -            | 5.37542 | -       |
| 90 | 1.5  | 1.65 | -184.2158887 | -            | 5.56636 | -       |
| 90 | 1.5  | 1.7  | -184.2073423 | -            | 5.79891 | -       |
| 90 | 1.5  | 1.75 | -184.1974494 | -            | 6.06809 | -       |
| 90 | 1.5  | 1.8  | -184.1867116 | -            | 6.36027 | -       |
| 90 | 1.5  | 1.85 | -184.1758462 | -            | 6.65591 | -       |
| 90 | 1.5  | 1.9  | -184.165558  | -            | 6.93586 | -       |
| 90 | 1.5  | 1.95 | -184.1564287 | -            | 7.18426 | -       |
| 90 | 1.5  | 2    | -184.1488362 | -            | 7.39086 | -       |
| 95 | 1    | 1.6  | -            | -184.3123604 | -       | 2.94136 |
| 95 | 1    | 1.7  | -            | -184.3294863 | -       | 2.47537 |
| 95 | 1    | 1.8  | -            | -184.3435713 | -       | 2.09212 |
| 95 | 1    | 1.9  | -            | -184.354567  | -       | 1.79292 |
| 95 | 1    | 2    | -            | -184.3627544 | -       | 1.57014 |
| 95 | 1    | 2.1  | -            | -184.3686054 | -       | 1.41094 |
| 95 | 1    | 2.2  | -            | -184.3726281 | -       | 1.30148 |
| 95 | 1    | 2.3  | -            | -184.3752802 | -       | 1.22932 |
| 95 | 1    | 2.4  | -            | -184.376938  | -       | 1.18421 |
| 95 | 1    | 2.5  | -            | -184.3778941 | -       | 1.15819 |
| 95 | 1    | 2.6  | -            | -184.3783669 | -       | 1.14533 |
| 95 | 1    | 2.7  | -            | -184.378515  | -       | 1.1413  |
| 95 | 1    | 2.8  | -            | -184.3784501 | -       | 1.14306 |
| 95 | 1    | 2.9  | -            | -184.3782503 | -       | 1.1485  |
| 95 | 1    | 3    | -            | -184.3779685 | -       | 1.15617 |
| 95 | 1.05 | 1.6  | -            | -184.3521451 | -       | 1.85882 |
| 95 | 1.05 | 1.7  | -            | -184.36541   | -       | 1.49788 |
| 95 | 1.05 | 1.8  | -            | -184.3767722 | -       | 1.18872 |
| 95 | 1.05 | 1.9  | -            | -184.38594   | -       | 0.93926 |
| 95 | 1.05 | 2    | -            | -184.3929194 | -       | 0.74935 |
| 95 | 1.05 | 2.1  | -            | -184.3979725 | -       | 0.61186 |
| 95 | 1.05 | 2.2  | -            | -184.4014661 | -       | 0.5168  |
| 95 | 1.05 | 2.3  | -            | -184.4037637 | -       | 0.45428 |
| 95 | 1.05 | 2.4  | -            | -184.4051824 | -       | 0.41568 |
| 95 | 1.05 | 2.5  | -            | -184.4059753 | -       | 0.3941  |
| 95 | 1.05 | 2.6  | -            | -184.4063346 | -       | 0.38433 |

|     |      |      |              |              |         |         |
|-----|------|------|--------------|--------------|---------|---------|
| 95  | 1.05 | 2.7  | -            | -184.4064023 | -       | 0.38248 |
| 95  | 1.05 | 2.8  | -            | -184.4062793 | -       | 0.38583 |
| 95  | 1.05 | 2.9  | -            | -184.4060364 | -       | 0.39244 |
| 95  | 1.05 | 3    | -            | -184.4057227 | -       | 0.40097 |
| 95  | 1.1  | 1.6  | -            | -184.3734626 | -       | 1.27877 |
| 95  | 1.1  | 1.7  | -            | -184.3828521 | -       | 1.02328 |
| 95  | 1.1  | 1.8  | -            | -184.3913805 | -       | 0.79123 |
| 95  | 1.1  | 1.9  | -            | -184.3986068 | -       | 0.5946  |
| 95  | 1.1  | 2    | -            | -184.4042878 | -       | 0.44002 |
| 95  | 1.1  | 2.1  | -            | -184.4084717 | -       | 0.32618 |
| 95  | 1.1  | 2.2  | -            | -184.4113774 | -       | 0.24711 |
| 95  | 1.1  | 2.3  | -            | -184.4132734 | -       | 0.19552 |
| 95  | 1.1  | 2.4  | -            | -184.4144148 | -       | 0.16446 |
| 95  | 1.1  | 2.5  | -            | -184.4150132 | -       | 0.14818 |
| 95  | 1.1  | 2.6  | -            | -184.4152354 | -       | 0.14213 |
| 95  | 1.1  | 2.7  | -            | -184.4152049 | -       | 0.14296 |
| 95  | 1.1  | 2.8  | -            | -184.4150106 | -       | 0.14825 |
| 95  | 1.1  | 2.9  | -            | -184.4147152 | -       | 0.15629 |
| 95  | 1.1  | 3    | -            | -184.4143624 | -       | 0.16589 |
| 95  | 1.15 | 1.6  | -            | -184.3816069 | -       | 1.05717 |
| 95  | 1.15 | 1.7  | -            | -184.3871469 | -       | 0.90642 |
| 95  | 1.15 | 1.8  | -            | -184.3926861 | -       | 0.7557  |
| 95  | 1.15 | 1.9  | -            | -184.3977827 | -       | 0.61702 |
| 95  | 1.15 | 2    | -            | -184.4020045 | -       | 0.50215 |
| 95  | 1.15 | 2.1  | -            | -184.4052081 | -       | 0.41498 |
| 95  | 1.15 | 2.2  | -            | -184.4074613 | -       | 0.35367 |
| 95  | 1.15 | 2.3  | -            | -184.4089253 | -       | 0.31383 |
| 95  | 1.15 | 2.4  | -            | -184.4097822 | -       | 0.29052 |
| 95  | 1.15 | 2.5  | -            | -184.4101913 | -       | 0.27938 |
| 95  | 1.15 | 2.6  | -            | -184.4102868 | -       | 0.27678 |
| 95  | 1.15 | 2.7  | -            | -184.4105679 | -       | 0.26914 |
| 95  | 1.15 | 2.8  | -            | -184.4103219 | -       | 0.27583 |
| 95  | 1.15 | 2.9  | -            | -184.4099756 | -       | 0.28525 |
| 95  | 1.15 | 3    | -            | -184.4095817 | -       | 0.29597 |
| 95  | 1.2  | 1.6  | -            | -184.3805518 | -       | 1.08588 |
| 95  | 1.2  | 1.7  | -            | -184.3823818 | -       | 1.03608 |
| 95  | 1.2  | 1.8  | -            | -184.3848674 | -       | 0.96845 |
| 95  | 1.2  | 1.9  | -            | -184.3876809 | -       | 0.89189 |
| 95  | 1.2  | 2    | -            | -184.3902759 | -       | 0.82128 |
| 95  | 1.2  | 2.1  | -            | -184.3923381 | -       | 0.76517 |
| 95  | 1.2  | 2.2  | -            | -184.3937914 | -       | 0.72563 |
| 95  | 1.2  | 2.3  | -            | -184.3946912 | -       | 0.70114 |
| 95  | 1.2  | 2.4  | -            | -184.3951454 | -       | 0.68878 |
| 95  | 1.2  | 2.5  | -            | -184.3952667 | -       | 0.68548 |
| 95  | 1.2  | 2.6  | -            | -184.3951541 | -       | 0.68855 |
| 95  | 1.2  | 2.7  | -            | -184.3948854 | -       | 0.69586 |
| 95  | 1.2  | 2.8  | -            | -184.3945202 | -       | 0.70579 |
| 95  | 1.2  | 2.9  | -            | -184.3941006 | -       | 0.71721 |
| 95  | 1.2  | 3    | -            | -184.3936566 | -       | 0.72929 |
| 100 | 1    | 1    | -183.9632939 | -183.9755179 | 12.4395 | 12.1068 |
| 100 | 1    | 1.05 | -184.0402521 | -184.0600837 | 10.3454 | 9.80581 |
| 100 | 1    | 1.1  | -184.0969111 | -184.123165  | 8.80374 | 8.08937 |
| 100 | 1    | 1.15 | -184.1384771 | -184.1702509 | 7.67273 | 6.80816 |
| 100 | 1    | 1.2  | -184.168839  | -184.2054993 | 6.84658 | 5.84905 |
| 100 | 1    | 1.25 | -184.1909171 | -184.2320745 | 6.24584 | 5.12594 |
| 100 | 1    | 1.3  | -184.2068989 | -184.2523915 | 5.81097 | 4.57312 |
| 100 | 1    | 1.35 | -184.2184069 | -184.2682913 | 5.49784 | 4.14048 |
| 100 | 1    | 1.4  | -184.2266266 | -184.2811667 | 5.27418 | 3.79014 |
| 100 | 1    | 1.45 | -184.2324173 | -184.2920482 | 5.11662 | 3.49406 |
| 100 | 1    | 1.5  | -184.2364057 | -184.3016609 | 5.00809 | 3.2325  |
| 100 | 1    | 1.55 | -184.2390588 | -            | 4.9359  | -       |
| 100 | 1    | 1.6  | -184.2407368 | -184.3186875 | 4.89024 | 2.7692  |
| 100 | 1    | 1.65 | -184.2417208 | -            | 4.86347 | -       |
| 100 | 1    | 1.7  | -184.2422303 | -184.333591  | 4.8496  | 2.36368 |
| 100 | 1    | 1.75 | -184.2424383 | -            | 4.84394 | -       |
| 100 | 1    | 1.8  | -184.2424737 | -184.346164  | 4.84298 | 2.02157 |
| 100 | 1    | 1.85 | -184.2424286 | -            | 4.84421 | -       |
| 100 | 1    | 1.9  | -184.2423648 | -184.3561513 | 4.84594 | 1.74981 |
| 100 | 1    | 1.95 | -184.2423169 | -            | 4.84725 | -       |
| 100 | 1    | 2    | -184.2423053 | -184.3636644 | 4.84756 | 1.54538 |
| 100 | 1    | 2.1  | -            | -184.3690623 | -       | 1.3985  |
| 100 | 1    | 2.2  | -            | -184.3727811 | -       | 1.29732 |
| 100 | 1    | 2.3  | -            | -184.3752324 | -       | 1.23062 |

|     |      |      |              |              |         |         |
|-----|------|------|--------------|--------------|---------|---------|
| 100 | 1    | 2.4  | -            | -184.3767612 | -       | 1.18902 |
| 100 | 1    | 2.5  | -            | -184.3776384 | -       | 1.16515 |
| 100 | 1    | 2.6  | -            | -184.3780667 | -       | 1.15349 |
| 100 | 1    | 2.7  | -            | -184.3781936 | -       | 1.15004 |
| 100 | 1    | 2.8  | -            | -184.3781232 | -       | 1.15196 |
| 100 | 1    | 2.9  | -            | -184.377928  | -       | 1.15727 |
| 100 | 1    | 3    | -            | -184.3776584 | -       | 1.1646  |
| 100 | 1.05 | 1    | -184.0265436 | -184.0502669 | 10.7184 | 10.0729 |
| 100 | 1.05 | 1.05 | -184.0990418 | -184.1308261 | 8.74576 | 7.88091 |
| 100 | 1.05 | 1.1  | -184.1517315 | -184.1902253 | 7.31208 | 6.26466 |
| 100 | 1.05 | 1.15 | -184.1897758 | -184.2339068 | 6.27689 | 5.07609 |
| 100 | 1.05 | 1.2  | -184.2169948 | -184.2659781 | 5.53626 | 4.20342 |
| 100 | 1.05 | 1.25 | -184.2362437 | -184.2895534 | 5.0125  | 3.56194 |
| 100 | 1.05 | 1.3  | -184.2496677 | -184.3069998 | 4.64723 | 3.08722 |
| 100 | 1.05 | 1.35 | -184.2588736 | -184.3201181 | 4.39674 | 2.73028 |
| 100 | 1.05 | 1.4  | -184.2650477 | -184.330274  | 4.22874 | 2.45393 |
| 100 | 1.05 | 1.45 | -184.2690511 | -184.3384924 | 4.11981 | 2.23031 |
| 100 | 1.05 | 1.5  | -184.2715048 | -184.3455217 | 4.05304 | 2.03904 |
| 100 | 1.05 | 1.55 | -184.2728589 | -            | 4.0162  | -       |
| 100 | 1.05 | 1.6  | -184.2734486 | -184.3578551 | 4.00015 | 1.70345 |
| 100 | 1.05 | 1.65 | -184.2735313 | -            | 3.9979  | -       |
| 100 | 1.05 | 1.7  | -184.2732997 | -184.3690673 | 4.0042  | 1.39837 |
| 100 | 1.05 | 1.75 | -184.2728973 | -            | 4.01515 | -       |
| 100 | 1.05 | 1.8  | -184.2724332 | -184.3790424 | 4.02778 | 1.12695 |
| 100 | 1.05 | 1.85 | -184.2719795 | -            | 4.04013 | -       |
| 100 | 1.05 | 1.9  | -184.271581  | -184.3872935 | 4.05097 | 0.90243 |
| 100 | 1.05 | 1.95 | -184.2712592 | -            | 4.05973 | -       |
| 100 | 1.05 | 2    | -184.2710236 | -184.3936686 | 4.06614 | 0.72897 |
| 100 | 1.05 | 2.1  | -            | -184.3983199 | -       | 0.60241 |
| 100 | 1.05 | 2.2  | -            | -184.4015451 | -       | 0.51465 |
| 100 | 1.05 | 2.3  | -            | -184.403667  | -       | 0.45691 |
| 100 | 1.05 | 2.4  | -            | -184.4049743 | -       | 0.42134 |
| 100 | 1.05 | 2.5  | -            | -184.4056993 | -       | 0.40161 |
| 100 | 1.05 | 2.6  | -            | -184.4060215 | -       | 0.39285 |
| 100 | 1.05 | 2.7  | -            | -184.4060726 | -       | 0.39146 |
| 100 | 1.05 | 2.8  | -            | -184.4059468 | -       | 0.39488 |
| 100 | 1.05 | 2.9  | -            | -184.4057103 | -       | 0.40131 |
| 100 | 1.05 | 3    | -            | -184.4054093 | -       | 0.4095  |
| 100 | 1.1  | 1    | -184.0708228 | -184.1039175 | 9.5136  | 8.61309 |
| 100 | 1.1  | 1.05 | -184.1390582 | -184.1807128 | 7.65692 | 6.52349 |
| 100 | 1.1  | 1.1  | -184.1879137 | -184.2366655 | 6.32756 | 5.00102 |
| 100 | 1.1  | 1.15 | -184.2225551 | -184.2771757 | 5.38496 | 3.89874 |
| 100 | 1.1  | 1.2  | -184.246752  | -184.3063065 | 4.72657 | 3.10609 |
| 100 | 1.1  | 1.25 | -184.2632845 | -184.3271251 | 4.27672 | 2.53962 |
| 100 | 1.1  | 1.3  | -184.2742304 | -184.3419517 | 3.97888 | 2.13618 |
| 100 | 1.1  | 1.35 | -184.2811602 | -184.3525464 | 3.79032 | 1.8479  |
| 100 | 1.1  | 1.4  | -184.2852552 | -184.3602402 | 3.6789  | 1.63855 |
| 100 | 1.1  | 1.45 | -184.2873891 | -184.3660389 | 3.62083 | 1.48077 |
| 100 | 1.1  | 1.5  | -184.2881941 | -184.3706923 | 3.59893 | 1.35415 |
| 100 | 1.1  | 1.55 | -184.2881235 | -            | 3.60085 | -       |
| 100 | 1.1  | 1.6  | -184.2875063 | -184.3785529 | 3.61764 | 1.14027 |
| 100 | 1.1  | 1.65 | -184.2865788 | -            | 3.64288 | -       |
| 100 | 1.1  | 1.7  | -184.2855156 | -184.3860515 | 3.67181 | 0.93623 |
| 100 | 1.1  | 1.75 | -184.284433  | -            | 3.70127 | -       |
| 100 | 1.1  | 1.8  | -184.283413  | -184.3933056 | 3.72902 | 0.73884 |
| 100 | 1.1  | 1.85 | -184.2825105 | -            | 3.75358 | -       |
| 100 | 1.1  | 1.9  | -184.281746  | -184.3997095 | 3.77438 | 0.5646  |
| 100 | 1.1  | 1.95 | -184.28113   | -            | 3.79114 | -       |
| 100 | 1.1  | 2    | -184.2806526 | -184.4048568 | 3.80413 | 0.42454 |
| 100 | 1.1  | 2.1  | -            | -184.4086923 | -       | 0.32017 |
| 100 | 1.1  | 2.2  | -            | -184.4113708 | -       | 0.24729 |
| 100 | 1.1  | 2.3  | -            | -184.4131199 | -       | 0.1997  |
| 100 | 1.1  | 2.4  | -            | -184.4141697 | -       | 0.17113 |
| 100 | 1.1  | 2.5  | -            | -184.4147142 | -       | 0.15632 |
| 100 | 1.1  | 2.6  | -            | -184.4149084 | -       | 0.15103 |
| 100 | 1.1  | 2.7  | -            | -184.4148671 | -       | 0.15216 |
| 100 | 1.1  | 2.8  | -            | -184.4146736 | -       | 0.15742 |
| 100 | 1.1  | 2.9  | -            | -184.4143865 | -       | 0.16523 |
| 100 | 1.1  | 3    | -            | -184.4140474 | -       | 0.17446 |
| 100 | 1.15 | 1    | -184.1014421 | -184.141918  | 8.68045 | 7.5791  |
| 100 | 1.15 | 1.05 | -184.1656855 | -184.2151851 | 6.93239 | 5.5855  |
| 100 | 1.15 | 1.1  | -184.21089   | -184.2679033 | 5.70237 | 4.15104 |
| 100 | 1.15 | 1.15 | -184.2422773 | -184.3054409 | 4.84832 | 3.12964 |



|     |      |      |              |              |         |         |
|-----|------|------|--------------|--------------|---------|---------|
| 100 | 1.15 | 1.2  | -184.2636089 | -184.3318345 | 4.26789 | 2.41147 |
| 100 | 1.15 | 1.25 | -184.277603  | -184.3501136 | 3.88711 | 1.9141  |
| 100 | 1.15 | 1.3  | -184.2862459 | -184.3625532 | 3.65194 | 1.57562 |
| 100 | 1.15 | 1.35 | -184.2910275 | -184.3708658 | 3.52183 | 1.34943 |
| 100 | 1.15 | 1.4  | -184.2930954 | -184.3763429 | 3.46556 | 1.2004  |
| 100 | 1.15 | 1.45 | -184.2933297 | -184.3799611 | 3.45919 | 1.10195 |
| 100 | 1.15 | 1.5  | -184.2923864 | -184.3824558 | 3.48486 | 1.03407 |
| 100 | 1.15 | 1.55 | -184.2907629 | -            | 3.52903 | -       |
| 100 | 1.15 | 1.6  | -184.2887864 | -184.3861221 | 3.58281 | 0.93431 |
| 100 | 1.15 | 1.65 | -184.2867088 | -            | 3.63934 | -       |
| 100 | 1.15 | 1.7  | -184.2846848 | -184.3899144 | 3.69441 | 0.83112 |
| 100 | 1.15 | 1.75 | -184.2828177 | -            | 3.74522 | -       |
| 100 | 1.15 | 1.8  | -184.2811647 | -184.3942924 | 3.7902  | 0.71199 |
| 100 | 1.15 | 1.85 | -184.2797489 | -            | 3.82872 | -       |
| 100 | 1.15 | 1.9  | -184.2785769 | -184.3986569 | 3.86061 | 0.59324 |
| 100 | 1.15 | 1.95 | -184.2776337 | -            | 3.88628 | -       |
| 100 | 1.15 | 2    | -184.2768942 | -184.4024167 | 3.9064  | 0.49093 |
| 100 | 1.15 | 2.1  | -            | -184.4053243 | -       | 0.41181 |
| 100 | 1.15 | 2.2  | -            | -184.4073872 | -       | 0.35568 |
| 100 | 1.15 | 2.3  | -            | -184.4087316 | -       | 0.3191  |
| 100 | 1.15 | 2.4  | -            | -184.4095154 | -       | 0.29777 |
| 100 | 1.15 | 2.5  | -            | -184.4098836 | -       | 0.28776 |
| 100 | 1.15 | 2.6  | -            | -184.4099611 | -       | 0.28565 |
| 100 | 1.15 | 2.7  | -            | -184.4098408 | -       | 0.28892 |
| 100 | 1.15 | 2.8  | -            | -184.409963  | -       | 0.2856  |
| 100 | 1.15 | 2.9  | -            | -184.4096411 | -       | 0.29436 |
| 100 | 1.15 | 3    | -            | -184.4092661 | -       | 0.30456 |
| 100 | 1.2  | 1    | -184.1221817 | -184.1683852 | 8.11612 | 6.85893 |
| 100 | 1.2  | 1.05 | -184.1827598 | -184.238345  | 6.46779 | 4.95532 |
| 100 | 1.2  | 1.1  | -184.2245402 | -184.2880083 | 5.33095 | 3.60398 |
| 100 | 1.2  | 1.15 | -184.2528395 | -184.3227386 | 4.56093 | 2.65897 |
| 100 | 1.2  | 1.2  | -184.2714669 | -184.3465742 | 4.05408 | 2.01041 |
| 100 | 1.2  | 1.25 | -184.2831267 | -184.3625093 | 3.73681 | 1.57681 |
| 100 | 1.2  | 1.3  | -184.2897295 | -184.3727712 | 3.55715 | 1.29759 |
| 100 | 1.2  | 1.35 | -184.2926401 | -184.3790234 | 3.47795 | 1.12746 |
| 100 | 1.2  | 1.4  | -184.2928945 | -184.382514  | 3.47103 | 1.03248 |
| 100 | 1.2  | 1.45 | -184.2913254 | -184.3841834 | 3.51372 | 0.98706 |
| 100 | 1.2  | 1.5  | -184.288629  | -184.3847417 | 3.5871  | 0.97187 |
| 100 | 1.2  | 1.55 | -184.2853271 | -            | 3.67694 | -       |
| 100 | 1.2  | 1.6  | -184.2818241 | -184.3845617 | 3.77225 | 0.97676 |
| 100 | 1.2  | 1.65 | -184.2784012 | -            | 3.86539 | -       |
| 100 | 1.2  | 1.7  | -184.2752382 | -184.3847598 | 3.95146 | 0.97137 |
| 100 | 1.2  | 1.75 | -184.2724328 | -            | 4.02779 | -       |
| 100 | 1.2  | 1.8  | -184.2700229 | -184.386177  | 4.09337 | 0.93281 |
| 100 | 1.2  | 1.85 | -184.2680061 | -            | 4.14824 | -       |
| 100 | 1.2  | 1.9  | -184.2663567 | -184.3883419 | 4.19312 | 0.87391 |
| 100 | 1.2  | 1.95 | -184.2650367 | -            | 4.22904 | -       |
| 100 | 1.2  | 2    | -184.2640039 | -184.3905428 | 4.25714 | 0.81402 |
| 100 | 1.2  | 2.1  | -            | -184.3923615 | -       | 0.76453 |
| 100 | 1.2  | 2.2  | -            | -184.3936594 | -       | 0.72922 |
| 100 | 1.2  | 2.3  | -            | -184.3944614 | -       | 0.70739 |
| 100 | 1.2  | 2.4  | -            | -184.3948584 | -       | 0.69659 |
| 100 | 1.2  | 2.5  | -            | -184.3949499 | -       | 0.6941  |
| 100 | 1.2  | 2.6  | -            | -184.3948251 | -       | 0.6975  |
| 100 | 1.2  | 2.7  | -            | -184.3945557 | -       | 0.70483 |
| 100 | 1.2  | 2.8  | -            | -184.3941978 | -       | 0.71457 |
| 100 | 1.2  | 2.9  | -            | -184.3937907 | -       | 0.72565 |
| 100 | 1.2  | 3    | -            | -184.3933626 | -       | 0.73729 |
| 100 | 1.25 | 1    | -184.1357085 | -184.1864224 | 7.74806 | 6.36814 |
| 100 | 1.25 | 1.05 | -184.1929626 | -184.2532877 | 6.19018 | 4.54873 |
| 100 | 1.25 | 1.1  | -184.2315743 | -184.3000665 | 5.13955 | 3.27588 |
| 100 | 1.25 | 1.15 | -184.2569641 | -184.3321739 | 4.4487  | 2.40224 |
| 100 | 1.25 | 1.2  | -184.2730231 | -184.3536545 | 4.01173 | 1.81775 |
| 100 | 1.25 | 1.25 | -184.2825053 | -184.3674453 | 3.75372 | 1.4425  |
| 100 | 1.25 | 1.3  | -184.2873179 | -184.3757268 | 3.62277 | 1.21716 |
| 100 | 1.25 | 1.35 | -184.2887364 | -184.380122  | 3.58417 | 1.09757 |
| 100 | 1.25 | 1.4  | -184.2876163 | -184.3818373 | 3.61465 | 1.0509  |
| 100 | 1.25 | 1.45 | -184.2846191 | -184.3817745 | 3.69621 | 1.05261 |
| 100 | 1.25 | 1.5  | -184.2803523 | -184.3806139 | 3.8123  | 1.08418 |
| 100 | 1.25 | 1.55 | -184.2753875 | -            | 3.94739 | -       |
| 100 | 1.25 | 1.6  | -184.270219  | -            | 4.08803 | -       |
| 100 | 1.25 | 1.65 | -184.265234  | -            | 4.22367 | -       |
| 100 | 1.25 | 1.7  | -184.2606753 | -            | 4.34771 | -       |

|     |      |      |              |              |         |         |
|-----|------|------|--------------|--------------|---------|---------|
| 100 | 1.25 | 1.75 | -184.256697  | -            | 4.45597 | -       |
| 100 | 1.25 | 1.8  | -184.253332  | -            | 4.54749 | -       |
| 100 | 1.25 | 1.85 | -184.2505622 | -            | 4.62289 | -       |
| 100 | 1.25 | 1.9  | -184.2483263 | -            | 4.68373 | -       |
| 100 | 1.25 | 1.95 | -184.2465515 | -            | 4.73202 | -       |
| 100 | 1.25 | 2    | -184.2451604 | -            | 4.76988 | -       |
| 100 | 1.3  | 1    | -184.1439214 | -184.1983549 | 7.52459 | 6.04345 |
| 100 | 1.3  | 1.05 | -184.1981667 | -184.2623388 | 6.04857 | 4.30245 |
| 100 | 1.3  | 1.1  | -184.2338648 | -184.3064026 | 5.07723 | 3.10347 |
| 100 | 1.3  | 1.15 | -184.2565277 | -184.3360895 | 4.46057 | 2.29569 |
| 100 | 1.3  | 1.2  | -184.2701272 | -184.3554276 | 4.09053 | 1.76951 |
| 100 | 1.3  | 1.25 | -184.2774957 | -184.3672714 | 3.89003 | 1.44723 |
| 100 | 1.3  | 1.3  | -184.2806223 | -184.3737566 | 3.80496 | 1.27077 |
| 100 | 1.3  | 1.35 | -184.2808146 | -184.3764755 | 3.79972 | 1.19679 |
| 100 | 1.3  | 1.4  | -184.2788339 | -184.3766012 | 3.85362 | 1.19337 |
| 100 | 1.3  | 1.45 | -184.2750822 | -184.3749987 | 3.9557  | 1.23698 |
| 100 | 1.3  | 1.5  | -184.2698727 | -184.3723161 | 4.09745 | 1.30997 |
| 100 | 1.3  | 1.55 | -184.2636266 | -            | 4.26741 | -       |
| 100 | 1.3  | 1.6  | -184.2568932 | -            | 4.45063 | -       |
| 100 | 1.3  | 1.65 | -184.2501886 | -            | 4.63306 | -       |
| 100 | 1.3  | 1.7  | -184.2439494 | -            | 4.80283 | -       |
| 100 | 1.3  | 1.75 | -184.2384582 | -            | 4.95224 | -       |
| 100 | 1.3  | 1.8  | -184.2338354 | -            | 5.07803 | -       |
| 100 | 1.3  | 1.85 | -184.2300485 | -            | 5.18107 | -       |
| 100 | 1.3  | 1.9  | -184.2270262 | -            | 5.26331 | -       |
| 100 | 1.3  | 1.95 | -184.2246566 | -            | 5.32778 | -       |
| 100 | 1.3  | 2    | -184.2228178 | -            | 5.37782 | -       |
| 100 | 1.35 | 1    | -184.1482145 | -184.2059076 | 7.40777 | 5.83794 |
| 100 | 1.35 | 1.05 | -184.1997159 | -184.2672262 | 6.00642 | 4.16946 |
| 100 | 1.35 | 1.1  | -184.2327413 | -184.3087251 | 5.1078  | 3.04028 |
| 100 | 1.35 | 1.15 | -184.2528605 | -184.3361982 | 4.56035 | 2.29274 |
| 100 | 1.35 | 1.2  | -184.2641035 | -184.3536046 | 4.25443 | 1.81911 |
| 100 | 1.35 | 1.25 | -184.2693744 | -184.3636924 | 4.11101 | 1.54462 |
| 100 | 1.35 | 1.3  | -184.2707432 | -184.3685552 | 4.07377 | 1.4123  |
| 100 | 1.35 | 1.35 | -184.2696564 | -184.369764  | 4.10334 | 1.37941 |
| 100 | 1.35 | 1.4  | -184.2669963 | -184.368466  | 4.17572 | 1.41473 |
| 100 | 1.35 | 1.45 | -184.2630992 | -184.3654934 | 4.28176 | 1.49562 |
| 100 | 1.35 | 1.5  | -184.2579131 | -184.3614622 | 4.42287 | 1.6053  |
| 100 | 1.35 | 1.55 | -184.251386  | -            | 4.60048 | -       |
| 100 | 1.35 | 1.6  | -184.2437771 | -            | 4.80752 | -       |
| 100 | 1.35 | 1.65 | -184.2356471 | -            | 5.02873 | -       |
| 100 | 1.35 | 1.7  | -184.2276481 | -            | 5.24639 | -       |
| 100 | 1.35 | 1.75 | -184.2203263 | -            | 5.44561 | -       |
| 100 | 1.35 | 1.8  | -184.2140144 | -            | 5.61736 | -       |
| 100 | 1.35 | 1.85 | -184.20882   | -            | 5.7587  | -       |
| 100 | 1.35 | 1.9  | -184.204686  | -            | 5.87118 | -       |
| 100 | 1.35 | 1.95 | -184.2014686 | -            | 5.95873 | -       |
| 100 | 1.35 | 2    | -184.1989936 | -            | 6.02607 | -       |
| 100 | 1.4  | 1    | -184.1496545 | -184.2103421 | 7.36859 | 5.71728 |
| 100 | 1.4  | 1.05 | -184.1986358 | -184.2692147 | 6.03581 | 4.11536 |
| 100 | 1.4  | 1.1  | -184.2292059 | -184.3082424 | 5.204   | 3.05341 |
| 100 | 1.4  | 1.15 | -184.2469717 | -184.3337434 | 4.72059 | 2.35953 |
| 100 | 1.4  | 1.2  | -184.2559925 | -184.3494194 | 4.47513 | 1.93299 |
| 100 | 1.4  | 1.25 | -184.2591871 | -184.3579261 | 4.38821 | 1.70152 |
| 100 | 1.4  | 1.3  | -184.2586821 | -184.3613379 | 4.40195 | 1.60869 |
| 100 | 1.4  | 1.35 | -184.2560311 | -184.3611965 | 4.47408 | 1.61253 |
| 100 | 1.4  | 1.4  | -184.2523559 | -184.3586298 | 4.57409 | 1.68237 |
| 100 | 1.4  | 1.45 | -184.2482353 | -184.3544425 | 4.68621 | 1.79631 |
| 100 | 1.4  | 1.5  | -184.243624  | -184.3492203 | 4.81168 | 1.9384  |
| 100 | 1.4  | 1.55 | -184.2379944 | -            | 4.96486 | -       |
| 100 | 1.4  | 1.6  | -184.2309065 | -            | 5.15772 | -       |
| 100 | 1.4  | 1.65 | -184.2224473 | -            | 5.3879  | -       |
| 100 | 1.4  | 1.7  | -184.2133242 | -            | 5.63614 | -       |
| 100 | 1.4  | 1.75 | -184.2043026 | -            | 5.88162 | -       |
| 100 | 1.4  | 1.8  | -184.1961059 | -            | 6.10465 | -       |
| 100 | 1.4  | 1.85 | -184.1891422 | -            | 6.29413 | -       |
| 100 | 1.4  | 1.9  | -184.1835222 | -            | 6.44705 | -       |
| 100 | 1.4  | 1.95 | -184.1791655 | -            | 6.5656  | -       |
| 100 | 1.4  | 2    | -184.1759076 | -            | 6.65424 | -       |
| 100 | 1.45 | 1    | -184.1490829 | -184.2125674 | 7.38414 | 5.65673 |
| 100 | 1.45 | 1.05 | -184.1957392 | -184.2692116 | 6.11463 | 4.11544 |
| 100 | 1.45 | 1.1  | -184.2240688 | -184.3057919 | 5.34378 | 3.12009 |
| 100 | 1.45 | 1.15 | -184.2396849 | -184.3296241 | 4.91886 | 2.47162 |

|     |      |      |              |              |         |         |
|-----|------|------|--------------|--------------|---------|---------|
| 100 | 1.45 | 1.2  | -184.2466457 | -184.3437414 | 4.72946 | 2.08749 |
| 100 | 1.45 | 1.25 | -184.2478586 | -184.3508345 | 4.69646 | 1.89448 |
| 100 | 1.45 | 1.3  | -184.2454556 | -184.3529526 | 4.76184 | 1.83685 |
| 100 | 1.45 | 1.35 | -184.2410192 | -184.3516198 | 4.88256 | 1.87311 |
| 100 | 1.45 | 1.4  | -184.2357898 | -184.3479383 | 5.02485 | 1.97329 |
| 100 | 1.45 | 1.45 | -184.2306906 | -184.3426862 | 5.1636  | 2.1162  |
| 100 | 1.45 | 1.5  | -184.2261039 | -184.3364215 | 5.2884  | 2.28666 |
| 100 | 1.45 | 1.55 | -184.22159   | -            | 5.41123 | -       |
| 100 | 1.45 | 1.6  | -184.2161643 | -            | 5.55886 | -       |
| 100 | 1.45 | 1.65 | -184.2090156 | -            | 5.75338 | -       |
| 100 | 1.45 | 1.7  | -184.2001918 | -            | 5.99347 | -       |
| 100 | 1.45 | 1.75 | -184.1904576 | -            | 6.25834 | -       |
| 100 | 1.45 | 1.8  | -184.1808303 | -            | 6.5203  | -       |
| 100 | 1.45 | 1.85 | -184.1722174 | -            | 6.75465 | -       |
| 100 | 1.45 | 1.9  | -184.1650786 | -            | 6.9489  | -       |
| 100 | 1.45 | 1.95 | -184.1595431 | -            | 7.09952 | -       |
| 100 | 1.45 | 2    | -184.1556737 | -            | 7.20481 | -       |
| 100 | 1.5  | 1    | -184.1471541 | -184.213226  | 7.43663 | 5.63881 |
| 100 | 1.5  | 1.05 | -184.1916852 | -184.2678485 | 6.22494 | 4.15253 |
| 100 | 1.5  | 1.1  | -184.2179973 | -184.3021358 | 5.50898 | 3.21957 |
| 100 | 1.5  | 1.15 | -184.2316841 | -184.3244665 | 5.13657 | 2.61196 |
| 100 | 1.5  | 1.2  | -184.2367849 | -184.3371709 | 4.99777 | 2.26627 |
| 100 | 1.5  | 1.25 | -184.2361858 | -184.3429936 | 5.01407 | 2.10783 |
| 100 | 1.5  | 1.3  | -184.2319786 | -184.3439766 | 5.12855 | 2.08109 |
| 100 | 1.5  | 1.35 | -184.2257147 | -184.3416099 | 5.29899 | 2.14548 |
| 100 | 1.5  | 1.4  | -184.218658  | -184.3369654 | 5.49101 | 2.27186 |
| 100 | 1.5  | 1.45 | -184.2118545 | -184.330796  | 5.67613 | 2.43973 |
| 100 | 1.5  | 1.5  | -184.2061135 | -184.3236351 | 5.83234 | 2.63458 |
| 100 | 1.5  | 1.55 | -184.2015961 | -            | 5.95526 | -       |
| 100 | 1.5  | 1.6  | -184.1974592 | -            | 6.06782 | -       |
| 100 | 1.5  | 1.65 | -184.192321  | -            | 6.20763 | -       |
| 100 | 1.5  | 1.7  | -184.1852378 | -            | 6.40037 | -       |
| 100 | 1.5  | 1.75 | -184.1762826 | -            | 6.64404 | -       |
| 100 | 1.5  | 1.8  | -184.1664341 | -            | 6.91202 | -       |
| 100 | 1.5  | 1.85 | -184.1569197 | -            | 7.1709  | -       |
| 100 | 1.5  | 1.9  | -184.1486997 | -            | 7.39457 | -       |
| 100 | 1.5  | 1.95 | -184.1422485 | -            | 7.57011 | -       |
| 100 | 1.5  | 2    | -184.1378015 | -            | 7.69111 | -       |
| 105 | 1    | 1.6  | -            | -184.3234093 | -       | 2.64072 |
| 105 | 1    | 1.7  | -            | -184.3364665 | -       | 2.28544 |
| 105 | 1    | 1.8  | -            | -184.3478463 | -       | 1.97579 |
| 105 | 1    | 1.9  | -            | -184.3570787 | -       | 1.72458 |
| 105 | 1    | 2    | -            | -184.3641084 | -       | 1.5333  |
| 105 | 1    | 2.1  | -            | -184.3691924 | -       | 1.39496 |
| 105 | 1    | 2.2  | -            | -184.3727075 | -       | 1.29932 |
| 105 | 1    | 2.3  | -            | -184.3750288 | -       | 1.23615 |
| 105 | 1    | 2.4  | -            | -184.3764784 | -       | 1.19671 |
| 105 | 1    | 2.5  | -            | -184.3773105 | -       | 1.17407 |
| 105 | 1    | 2.6  | -            | -184.3777176 | -       | 1.16299 |
| 105 | 1    | 2.7  | -            | -184.3778391 | -       | 1.15969 |
| 105 | 1    | 2.8  | -            | -184.3777738 | -       | 1.16147 |
| 105 | 1    | 2.9  | -            | -184.377591  | -       | 1.16644 |
| 105 | 1    | 3    | -            | -184.3773385 | -       | 1.17331 |
| 105 | 1.05 | 1.6  | -            | -184.3619521 | -       | 1.59197 |
| 105 | 1.05 | 1.7  | -            | -184.3714582 | -       | 1.33331 |
| 105 | 1.05 | 1.8  | -            | -184.3803479 | -       | 1.09142 |
| 105 | 1.05 | 1.9  | -            | -184.3879437 | -       | 0.88474 |
| 105 | 1.05 | 2    | -            | -184.3939167 | -       | 0.72222 |
| 105 | 1.05 | 2.1  | -            | -184.398316  | -       | 0.60251 |
| 105 | 1.05 | 2.2  | -            | -184.4013831 | -       | 0.51906 |
| 105 | 1.05 | 2.3  | -            | -184.4034073 | -       | 0.46398 |
| 105 | 1.05 | 2.4  | -            | -184.4046565 | -       | 0.42999 |
| 105 | 1.05 | 2.5  | -            | -184.4053512 | -       | 0.41108 |
| 105 | 1.05 | 2.6  | -            | -184.4056616 | -       | 0.40264 |
| 105 | 1.05 | 2.7  | -            | -184.4057134 | -       | 0.40123 |
| 105 | 1.05 | 2.8  | -            | -184.405597  | -       | 0.4044  |
| 105 | 1.05 | 2.9  | -            | -184.4053756 | -       | 0.41042 |
| 105 | 1.05 | 3    | -            | -184.4050939 | -       | 0.41809 |
| 105 | 1.1  | 1.6  | -            | -184.3820464 | -       | 1.04521 |
| 105 | 1.1  | 1.7  | -            | -184.387957  | -       | 0.88438 |
| 105 | 1.1  | 1.8  | -            | -184.3942152 | -       | 0.71409 |
| 105 | 1.1  | 1.9  | -            | -184.4000456 | -       | 0.55545 |
| 105 | 1.1  | 2    | -            | -184.4048688 | -       | 0.42421 |

|     |      |      |              |              |         |         |
|-----|------|------|--------------|--------------|---------|---------|
| 105 | 1.1  | 2.1  | -            | -184.4085207 | -       | 0.32484 |
| 105 | 1.1  | 2.2  | -            | -184.4110918 | -       | 0.25488 |
| 105 | 1.1  | 2.3  | -            | -184.412781  | -       | 0.20892 |
| 105 | 1.1  | 2.4  | -            | -184.4137999 | -       | 0.1812  |
| 105 | 1.1  | 2.5  | -            | -184.4143328 | -       | 0.16669 |
| 105 | 1.1  | 2.6  | -            | -184.4145277 | -       | 0.16139 |
| 105 | 1.1  | 2.7  | -            | -184.4144956 | -       | 0.16226 |
| 105 | 1.1  | 2.8  | -            | -184.4143168 | -       | 0.16713 |
| 105 | 1.1  | 2.9  | -            | -184.4140486 | -       | 0.17443 |
| 105 | 1.1  | 3    | -            | -184.4137311 | -       | 0.18307 |
| 105 | 1.15 | 1.6  | -            | -184.3890846 | -       | 0.8537  |
| 105 | 1.15 | 1.7  | -            | -184.3913918 | -       | 0.79092 |
| 105 | 1.15 | 1.8  | -            | -184.3948454 | -       | 0.69695 |
| 105 | 1.15 | 1.9  | -            | -184.3987096 | -       | 0.5918  |
| 105 | 1.15 | 2    | -            | -184.4022183 | -       | 0.49633 |
| 105 | 1.15 | 2.1  | -            | -184.4050021 | -       | 0.42058 |
| 105 | 1.15 | 2.2  | -            | -184.4070059 | -       | 0.36606 |
| 105 | 1.15 | 2.3  | -            | -184.4083285 | -       | 0.33007 |
| 105 | 1.15 | 2.4  | -            | -184.4091063 | -       | 0.30891 |
| 105 | 1.15 | 2.5  | -            | -184.4094832 | -       | 0.29865 |
| 105 | 1.15 | 2.6  | -            | -184.4095745 | -       | 0.29617 |
| 105 | 1.15 | 2.7  | -            | -184.4094735 | -       | 0.29891 |
| 105 | 1.15 | 2.8  | -            | -184.4092466 | -       | 0.30509 |
| 105 | 1.15 | 2.9  | -            | -184.4092831 | -       | 0.3041  |
| 105 | 1.15 | 3    | -            | -184.4089388 | -       | 0.31347 |
| 105 | 1.2  | 1.6  | -            | -184.3870789 | -       | 0.90827 |
| 105 | 1.2  | 1.7  | -            | -184.3858833 | -       | 0.9408  |
| 105 | 1.2  | 1.8  | -            | -184.3864285 | -       | 0.92597 |
| 105 | 1.2  | 1.9  | -            | -184.3881471 | -       | 0.87921 |
| 105 | 1.2  | 2    | -            | -184.3901603 | -       | 0.82443 |
| 105 | 1.2  | 2.1  | -            | -184.3919089 | -       | 0.77685 |
| 105 | 1.2  | 2.2  | -            | -184.3931895 | -       | 0.742   |
| 105 | 1.2  | 2.3  | -            | -184.3940013 | -       | 0.71991 |
| 105 | 1.2  | 2.4  | -            | -184.3944181 | -       | 0.70857 |
| 105 | 1.2  | 2.5  | -            | -184.3945328 | -       | 0.70545 |
| 105 | 1.2  | 2.6  | -            | -184.3944335 | -       | 0.70815 |
| 105 | 1.2  | 2.7  | -            | -184.3941911 | -       | 0.71475 |
| 105 | 1.2  | 2.8  | -            | -184.3938599 | -       | 0.72376 |
| 105 | 1.2  | 2.9  | -            | -184.3934796 | -       | 0.73411 |
| 105 | 1.2  | 3    | -            | -184.3930788 | -       | 0.74501 |
| 110 | 1    | 1    | -183.9833948 | -184.0308841 | 11.8925 | 10.6003 |
| 110 | 1    | 1.05 | -184.0614522 | -184.1108686 | 9.76858 | 8.42396 |
| 110 | 1    | 1.1  | -            | -184.1692113 | -       | 6.83645 |
| 110 | 1    | 1.15 | -            | -184.2115462 | -       | 5.68452 |
| 110 | 1    | 1.2  | -            | -184.2421418 | -       | 4.85201 |
| 110 | 1    | 1.25 | -            | -184.2642413 | -       | 4.25068 |
| 110 | 1    | 1.3  | -            | -184.2803113 | -       | 3.81342 |
| 110 | 1    | 1.35 | -            | -184.292225  | -       | 3.48925 |
| 110 | 1    | 1.6  | -            | -184.327413  | -       | 2.53178 |
| 110 | 1    | 1.7  | -            | -184.3388069 | -       | 2.22176 |
| 110 | 1    | 1.8  | -            | -184.3491367 | -       | 1.94068 |
| 110 | 1    | 1.9  | -            | -184.3577273 | -       | 1.70693 |
| 110 | 1    | 2    | -            | -184.3643601 | -       | 1.52645 |
| 110 | 1    | 2.1  | -            | -184.3691942 | -       | 1.39492 |
| 110 | 1    | 2.2  | -            | -184.3725507 | -       | 1.30358 |
| 110 | 1    | 2.3  | -            | -184.3747734 | -       | 1.24311 |
| 110 | 1    | 2.4  | -            | -184.376164  | -       | 1.20527 |
| 110 | 1    | 2.5  | -            | -184.3769646 | -       | 1.18348 |
| 110 | 1    | 2.6  | -            | -184.3773583 | -       | 1.17277 |
| 110 | 1    | 2.7  | -            | -184.3774787 | -       | 1.16949 |
| 110 | 1    | 2.8  | -            | -184.3774206 | -       | 1.17107 |
| 110 | 1    | 2.9  | -            | -184.3772501 | -       | 1.17572 |
| 110 | 1    | 3    | -            | -184.3770131 | -       | 1.18216 |
| 110 | 1.05 | 1    | -184.0421992 | -184.1003182 | 10.2924 | 8.71103 |
| 110 | 1.05 | 1.05 | -184.1151713 | -184.1766626 | 8.30688 | 6.6337  |
| 110 | 1.05 | 1.1  | -            | -184.2317142 | -       | 5.13575 |
| 110 | 1.05 | 1.15 | -            | -184.2710449 | -       | 4.06556 |
| 110 | 1.05 | 1.2  | -            | -184.2988642 | -       | 3.3086  |
| 110 | 1.05 | 1.25 | -            | -184.3183597 | -       | 2.77812 |
| 110 | 1.05 | 1.3  | -            | -184.3319477 | -       | 2.40839 |
| 110 | 1.05 | 1.35 | -            | -184.3414582 | -       | 2.14961 |
| 110 | 1.05 | 1.6  | -            | -184.365414  | -       | 1.49777 |
| 110 | 1.05 | 1.7  | -            | -184.3733757 | -       | 1.28114 |

|     |      |      |              |              |         |         |
|-----|------|------|--------------|--------------|---------|---------|
| 110 | 1.05 | 1.8  | -            | -184.3813024 | -       | 1.06545 |
| 110 | 1.05 | 1.9  | -            | -184.3883414 | -       | 0.87392 |
| 110 | 1.05 | 2    | -            | -184.393994  | -       | 0.72011 |
| 110 | 1.05 | 2.1  | -            | -184.3982043 | -       | 0.60555 |
| 110 | 1.05 | 2.2  | -            | -184.401158  | -       | 0.52518 |
| 110 | 1.05 | 2.3  | -            | -184.403115  | -       | 0.47193 |
| 110 | 1.05 | 2.4  | -            | -184.4043262 | -       | 0.43897 |
| 110 | 1.05 | 2.5  | -            | -184.4050029 | -       | 0.42056 |
| 110 | 1.05 | 2.6  | -            | -184.4053087 | -       | 0.41224 |
| 110 | 1.05 | 2.7  | -            | -184.4053654 | -       | 0.4107  |
| 110 | 1.05 | 2.8  | -            | -184.4052601 | -       | 0.41356 |
| 110 | 1.05 | 2.9  | -            | -184.4050541 | -       | 0.41917 |
| 110 | 1.05 | 3    | -            | -184.4047905 | -       | 0.42634 |
| 110 | 1.1  | 1    | -184.0863748 | -184.1489305 | 9.09043 | 7.38829 |
| 110 | 1.1  | 1.05 | -184.1515727 | -184.2219025 | 7.3164  | 5.40272 |
| 110 | 1.1  | 1.1  | -            | -184.2739067 | -       | 3.98769 |
| 110 | 1.1  | 1.15 | -            | -184.3104604 | -       | 2.99306 |
| 110 | 1.1  | 1.2  | -            | -184.3357204 | -       | 2.30574 |
| 110 | 1.1  | 1.25 | -            | -184.3528252 | -       | 1.84032 |
| 110 | 1.1  | 1.3  | -            | -184.3641443 | -       | 1.53232 |
| 110 | 1.1  | 1.35 | -            | -184.3714661 | -       | 1.3331  |
| 110 | 1.1  | 1.6  | -            | -184.3849669 | -       | 0.96574 |
| 110 | 1.1  | 1.7  | -            | -184.3894331 | -       | 0.84422 |
| 110 | 1.1  | 1.8  | -            | -184.394788  | -       | 0.69851 |
| 110 | 1.1  | 1.9  | -            | -184.4001286 | -       | 0.55319 |
| 110 | 1.1  | 2    | -            | -184.4047077 | -       | 0.42859 |
| 110 | 1.1  | 2.1  | -            | -184.4082386 | -       | 0.33252 |
| 110 | 1.1  | 2.2  | -            | -184.4107523 | -       | 0.26412 |
| 110 | 1.1  | 2.3  | -            | -184.412415  | -       | 0.21888 |
| 110 | 1.1  | 2.4  | -            | -184.4134249 | -       | 0.1914  |
| 110 | 1.1  | 2.5  | -            | -184.4139599 | -       | 0.17684 |
| 110 | 1.1  | 2.6  | -            | -184.4141641 | -       | 0.17128 |
| 110 | 1.1  | 2.7  | -            | -184.4141462 | -       | 0.17177 |
| 110 | 1.1  | 2.8  | -            | -184.4139854 | -       | 0.17615 |
| 110 | 1.1  | 2.9  | -            | -184.4137379 | -       | 0.18288 |
| 110 | 1.1  | 3    | -            | -184.4134427 | -       | 0.19091 |
| 110 | 1.15 | 1    | -184.1316526 | -184.1822504 | 7.85842 | 6.48166 |
| 110 | 1.15 | 1.05 | -184.1778251 | -184.2520965 | 6.60207 | 4.58114 |
| 110 | 1.15 | 1.1  | -            | -184.3012758 | -       | 3.24298 |
| 110 | 1.15 | 1.15 | -            | -184.3352536 | -       | 2.31844 |
| 110 | 1.15 | 1.2  | -            | -184.3581453 | -       | 1.69556 |
| 110 | 1.15 | 1.25 | -            | -184.3730497 | -       | 1.29001 |
| 110 | 1.15 | 1.3  | -            | -184.3822954 | -       | 1.03843 |
| 110 | 1.15 | 1.6  | -            | -184.3915015 | -       | 0.78793 |
| 110 | 1.15 | 1.7  | -            | -184.3924638 | -       | 0.76175 |
| 110 | 1.15 | 1.8  | -            | -184.3950568 | -       | 0.6912  |
| 110 | 1.15 | 1.9  | -            | -184.3984793 | -       | 0.59807 |
| 110 | 1.15 | 2    | -            | -184.4018069 | -       | 0.50752 |
| 110 | 1.15 | 2.1  | -            | -184.4045383 | -       | 0.4332  |
| 110 | 1.15 | 2.2  | -            | -184.4065435 | -       | 0.37864 |
| 110 | 1.15 | 2.3  | -            | -184.407884  | -       | 0.34217 |
| 110 | 1.15 | 2.4  | -            | -184.4086891 | -       | 0.32026 |
| 110 | 1.15 | 2.5  | -            | -184.4090923 | -       | 0.30929 |
| 110 | 1.15 | 2.6  | -            | -184.4092098 | -       | 0.30609 |
| 110 | 1.15 | 2.7  | -            | -184.409133  | -       | 0.30818 |
| 110 | 1.15 | 2.8  | -            | -184.408931  | -       | 0.31368 |
| 110 | 1.15 | 2.9  | -            | -184.408964  | -       | 0.31278 |
| 110 | 1.15 | 3    | -            | -184.4086509 | -       | 0.3213  |
| 110 | 1.2  | 1    | -184.1077835 | -184.2044158 | 8.5079  | 5.87854 |
| 110 | 1.2  | 1.05 | -184.2016742 | -184.2713606 | 5.95313 | 4.05697 |
| 110 | 1.2  | 1.1  | -            | -184.3179075 | -       | 2.79043 |
| 110 | 1.2  | 1.15 | -            | -184.349472  | -       | 1.93156 |
| 110 | 1.2  | 1.2  | -            | -184.3701478 | -       | 1.36897 |
| 110 | 1.2  | 1.25 | -            | -184.3830132 | -       | 1.0189  |
| 110 | 1.2  | 1.3  | -            | -184.3903609 | -       | 0.81897 |
| 110 | 1.2  | 1.6  | -            | -184.389039  | -       | 0.85494 |
| 110 | 1.2  | 1.7  | -            | -184.386609  | -       | 0.92106 |
| 110 | 1.2  | 1.8  | -            | -184.386334  | -       | 0.92854 |
| 110 | 1.2  | 1.9  | -            | -184.387639  | -       | 0.89303 |
| 110 | 1.2  | 2    | -            | -184.3895157 | -       | 0.84197 |
| 110 | 1.2  | 2.1  | -            | -184.3912681 | -       | 0.79429 |
| 110 | 1.2  | 2.2  | -            | -184.3926044 | -       | 0.75792 |
| 110 | 1.2  | 2.3  | -            | -184.3934806 | -       | 0.73408 |

|     |      |      |              |              |         |         |
|-----|------|------|--------------|--------------|---------|---------|
| 110 | 1.2  | 2.4  | -            | -184.3939552 | -       | 0.72117 |
| 110 | 1.2  | 2.5  | -            | -184.3941208 | -       | 0.71666 |
| 110 | 1.2  | 2.6  | -            | -184.3940647 | -       | 0.71819 |
| 110 | 1.2  | 2.7  | -            | -184.39386   | -       | 0.72376 |
| 110 | 1.2  | 2.8  | -            | -184.3935625 | -       | 0.73186 |
| 110 | 1.2  | 2.9  | -            | -184.3932138 | -       | 0.74134 |
| 110 | 1.2  | 3    | -            | -184.3928429 | -       | 0.75143 |
| 110 | 1.25 | 1    | -184.1153209 | -184.2185221 | 8.30281 | 5.4947  |
| 110 | 1.25 | 1.05 | -184.1823398 | -184.2827708 | 6.47922 | 3.7465  |
| 110 | 1.25 | 1.1  | -            | -184.3268539 | -       | 2.547   |
| 110 | 1.25 | 1.15 | -            | -184.3561452 | -       | 1.74998 |
| 110 | 1.25 | 1.2  | -            | -184.3747603 | -       | 1.24346 |
| 110 | 1.25 | 1.25 | -            | -184.3857586 | -       | 0.9442  |
| 110 | 1.25 | 1.3  | -            | -184.3913867 | -       | 0.79106 |
| 110 | 1.3  | 1    | -184.1199549 | -184.2268762 | 8.17672 | 5.26739 |
| 110 | 1.3  | 1.05 | -184.29948   | -184.2886206 | 3.29184 | 3.58732 |
| 110 | 1.3  | 1.1  | -            | -184.3303924 | -       | 2.45071 |
| 110 | 1.3  | 1.15 | -            | -184.3575549 | -       | 1.71162 |
| 110 | 1.3  | 1.2  | -            | -184.3742908 | -       | 1.25624 |
| 110 | 1.3  | 1.25 | -            | -184.3836072 | -       | 1.00274 |
| 110 | 1.3  | 1.3  | -            | -184.3876934 | -       | 0.89155 |
| 110 | 1.35 | 1    | -184.1225538 | -184.2311827 | 8.106   | 5.15021 |
| 110 | 1.35 | 1.05 | -184.179717  | -184.2906077 | 6.55059 | 3.53325 |
| 110 | 1.35 | 1.1  | -            | -184.3302088 | -       | 2.45571 |
| 110 | 1.35 | 1.15 | -            | -184.3553861 | -       | 1.77063 |
| 110 | 1.35 | 1.2  | -            | -184.3704334 | -       | 1.3612  |
| 110 | 1.35 | 1.25 | -            | -184.3782467 | -       | 1.1486  |
| 110 | 1.35 | 1.3  | -            | -184.3809556 | -       | 1.07489 |
| 110 | 1.4  | 1    | -184.1239116 | -184.2326854 | 8.06906 | 5.10932 |
| 110 | 1.4  | 1.05 | -184.1777716 | -184.2899718 | 6.60352 | 3.55056 |
| 110 | 1.4  | 1.1  | -            | -184.3275155 | -       | 2.52899 |
| 110 | 1.4  | 1.15 | -            | -184.3508495 | -       | 1.89408 |
| 110 | 1.4  | 1.2  | -            | -184.3644056 | -       | 1.52521 |
| 110 | 1.4  | 1.25 | -            | -184.3708869 | -       | 1.34886 |
| 110 | 1.4  | 1.3  | -            | -184.3723661 | -       | 1.30861 |
| 110 | 1.45 | 1    | -184.1245791 | -184.2322763 | 8.05089 | 5.12045 |
| 110 | 1.45 | 1.05 | -184.1757452 | -184.2876006 | 6.65866 | 3.61508 |
| 110 | 1.45 | 1.1  | -            | -184.3230947 | -       | 2.64928 |
| 110 | 1.45 | 1.15 | -            | -184.3448194 | -       | 2.05815 |
| 110 | 1.45 | 1.2  | -            | -184.3570774 | -       | 1.72461 |
| 110 | 1.45 | 1.25 | -            | -184.3623696 | -       | 1.58061 |
| 110 | 1.45 | 1.3  | -            | -184.3627547 | -       | 1.57014 |
| 110 | 1.5  | 1    | -184.1248832 | -184.2305809 | 8.04262 | 5.16658 |
| 110 | 1.5  | 1.05 | -            | -184.2841173 | -       | 3.70986 |
| 110 | 1.5  | 1.1  | -            | -184.3173197 | -       | 2.80642 |
| 110 | 1.5  | 1.15 | -            | -184.3379515 | -       | 2.24503 |
| 110 | 1.5  | 1.2  | -            | -184.3490447 | -       | 1.94318 |
| 110 | 1.5  | 1.25 | -            | -184.3532651 | -       | 1.82835 |
| 110 | 1.5  | 1.3  | -            | -184.3526791 | -       | 1.84429 |
| 115 | 1    | 1.6  | -            | -184.3311263 | -       | 2.43074 |
| 115 | 1    | 1.7  | -            | -184.3410201 | -       | 2.16153 |
| 115 | 1    | 1.8  | -            | -184.3503742 | -       | 1.90701 |
| 115 | 1    | 1.9  | -            | -184.3583525 | -       | 1.68992 |
| 115 | 1    | 2    | -            | -184.3646005 | -       | 1.51991 |
| 115 | 1    | 2.1  | -            | -184.3691904 | -       | 1.39502 |
| 115 | 1    | 2.2  | -            | -184.3723922 | -       | 1.3079  |
| 115 | 1    | 2.3  | -            | -184.3745182 | -       | 1.25005 |
| 115 | 1    | 2.4  | -            | -184.3758508 | -       | 1.21379 |
| 115 | 1    | 2.5  | -            | -184.3766191 | -       | 1.19288 |
| 115 | 1    | 2.6  | -            | -184.3769981 | -       | 1.18257 |
| 115 | 1    | 2.7  | -            | -184.377115  | -       | 1.17939 |
| 115 | 1    | 2.8  | -            | -184.3770606 | -       | 1.18087 |
| 115 | 1    | 2.9  | -            | -184.3768986 | -       | 1.18528 |
| 115 | 1    | 3    | -            | -184.3766738 | -       | 1.1914  |
| 115 | 1.05 | 1.6  | -            | -184.3687424 | -       | 1.40721 |
| 115 | 1.05 | 1.7  | -            | -184.3753444 | -       | 1.22757 |
| 115 | 1.05 | 1.8  | -            | -184.3823811 | -       | 1.0361  |
| 115 | 1.05 | 1.9  | -            | -184.3888686 | -       | 0.85958 |
| 115 | 1.05 | 2    | -            | -184.3941837 | -       | 0.71495 |
| 115 | 1.05 | 2.1  | -            | -184.3981846 | -       | 0.60609 |
| 115 | 1.05 | 2.2  | -            | -184.4010065 | -       | 0.5293  |
| 115 | 1.05 | 2.3  | -            | -184.4028813 | -       | 0.47829 |
| 115 | 1.05 | 2.4  | -            | -184.4040432 | -       | 0.44667 |

|     |      |     |   |              |   |         |
|-----|------|-----|---|--------------|---|---------|
| 115 | 1.05 | 2.5 | - | -184.4046928 | - | 0.429   |
| 115 | 1.05 | 2.6 | - | -184.4049862 | - | 0.42102 |
| 115 | 1.05 | 2.7 | - | -184.4050411 | - | 0.41952 |
| 115 | 1.05 | 2.8 | - | -184.4049404 | - | 0.42226 |
| 115 | 1.05 | 2.9 | - | -184.4047432 | - | 0.42763 |
| 115 | 1.05 | 3   | - | -184.404491  | - | 0.43449 |
| 115 | 1.1  | 1.6 | - | -184.3878627 | - | 0.88695 |
| 115 | 1.1  | 1.7 | - | -184.3911115 | - | 0.79854 |
| 115 | 1.1  | 1.8 | - | -184.3956589 | - | 0.67481 |
| 115 | 1.1  | 1.9 | - | -184.40051   | - | 0.54281 |
| 115 | 1.1  | 2   | - | -184.4048041 | - | 0.42597 |
| 115 | 1.1  | 2.1 | - | -184.4081678 | - | 0.33444 |
| 115 | 1.1  | 2.2 | - | -184.4105807 | - | 0.26879 |
| 115 | 1.1  | 2.3 | - | -184.412183  | - | 0.22519 |
| 115 | 1.1  | 2.4 | - | -184.4131576 | - | 0.19867 |
| 115 | 1.1  | 2.5 | - | -184.4136743 | - | 0.18461 |
| 115 | 1.1  | 2.6 | - | -184.413872  | - | 0.17923 |
| 115 | 1.1  | 2.7 | - | -184.4138552 | - | 0.17969 |
| 115 | 1.1  | 2.8 | - | -184.4137012 | - | 0.18388 |
| 115 | 1.1  | 2.9 | - | -184.413464  | - | 0.19033 |
| 115 | 1.1  | 3   | - | -184.4131818 | - | 0.19801 |
| 115 | 1.15 | 1.6 | - | -184.3939235 | - | 0.72203 |
| 115 | 1.15 | 1.7 | - | -184.3938064 | - | 0.72522 |
| 115 | 1.15 | 1.8 | - | -184.395672  | - | 0.67445 |
| 115 | 1.15 | 1.9 | - | -184.3986597 | - | 0.59316 |
| 115 | 1.15 | 2   | - | -184.4017572 | - | 0.50888 |
| 115 | 1.15 | 2.1 | - | -184.4043757 | - | 0.43763 |
| 115 | 1.15 | 2.2 | - | -184.4063273 | - | 0.38452 |
| 115 | 1.15 | 2.3 | - | -184.4076429 | - | 0.34873 |
| 115 | 1.15 | 2.4 | - | -184.4084369 | - | 0.32712 |
| 115 | 1.15 | 2.5 | - | -184.4088374 | - | 0.31622 |
| 115 | 1.15 | 2.6 | - | -184.4089579 | - | 0.31295 |
| 115 | 1.15 | 2.7 | - | -184.4088885 | - | 0.31483 |
| 115 | 1.15 | 2.8 | - | -184.4089869 | - | 0.31216 |
| 115 | 1.15 | 2.9 | - | -184.40874   | - | 0.31888 |
| 115 | 1.15 | 3   | - | -184.408435  | - | 0.32717 |
| 115 | 1.2  | 1.6 | - | -184.3909586 | - | 0.80271 |
| 115 | 1.2  | 1.7 | - | -184.3875814 | - | 0.8946  |
| 115 | 1.2  | 1.8 | - | -184.3866589 | - | 0.9197  |
| 115 | 1.2  | 1.9 | - | -184.3875783 | - | 0.89468 |
| 115 | 1.2  | 2   | - | -184.3892718 | - | 0.8486  |
| 115 | 1.2  | 2.1 | - | -184.3909614 | - | 0.80263 |
| 115 | 1.2  | 2.2 | - | -184.3922917 | - | 0.76643 |
| 115 | 1.2  | 2.3 | - | -184.3931814 | - | 0.74222 |
| 115 | 1.2  | 2.4 | - | -184.3936754 | - | 0.72878 |
| 115 | 1.2  | 2.5 | - | -184.3938596 | - | 0.72377 |
| 115 | 1.2  | 2.6 | - | -184.3938211 | - | 0.72482 |
| 115 | 1.2  | 2.7 | - | -184.3936332 | - | 0.72993 |
| 115 | 1.2  | 2.8 | - | -184.3933524 | - | 0.73757 |
| 115 | 1.2  | 2.9 | - | -184.3930208 | - | 0.74659 |
| 115 | 1.2  | 3   | - | -184.3926666 | - | 0.75623 |
| 120 | 1    | 1.6 | - | -184.3343286 | - | 2.34361 |
| 120 | 1    | 1.7 | - | -184.3429686 | - | 2.10851 |
| 120 | 1    | 1.8 | - | -184.3514824 | - | 1.87685 |
| 120 | 1    | 1.9 | - | -184.3589085 | - | 1.67479 |
| 120 | 1    | 2   | - | -184.3647971 | - | 1.51456 |
| 120 | 1    | 2.1 | - | -184.3691537 | - | 1.39602 |
| 120 | 1    | 2.2 | - | -184.3722082 | - | 1.3129  |
| 120 | 1    | 2.3 | - | -184.3742418 | - | 1.25757 |
| 120 | 1    | 2.4 | - | -184.3755189 | - | 1.22282 |
| 120 | 1    | 2.5 | - | -184.3762562 | - | 1.20276 |
| 120 | 1    | 2.6 | - | -184.3766199 | - | 1.19286 |
| 120 | 1    | 2.7 | - | -184.3767322 | - | 1.18981 |
| 120 | 1    | 2.8 | - | -184.3766805 | - | 1.19121 |
| 120 | 1    | 2.9 | - | -184.3765259 | - | 1.19542 |
| 120 | 1    | 3   | - | -184.3763108 | - | 1.20127 |
| 120 | 1.05 | 1.6 | - | -184.3716977 | - | 1.3268  |
| 120 | 1.05 | 1.7 | - | -184.3772143 | - | 1.17669 |
| 120 | 1.05 | 1.8 | - | -184.3835072 | - | 1.00546 |
| 120 | 1.05 | 1.9 | - | -184.3894878 | - | 0.84273 |
| 120 | 1.05 | 2   | - | -184.39446   | - | 0.70743 |
| 120 | 1.05 | 2.1 | - | -184.3982322 | - | 0.60479 |
| 120 | 1.05 | 2.2 | - | -184.4009037 | - | 0.5321  |

|     |      |     |   |              |   |         |
|-----|------|-----|---|--------------|---|---------|
| 120 | 1.05 | 2.3 | - | -184.4026816 | - | 0.48372 |
| 120 | 1.05 | 2.4 | - | -184.4037828 | - | 0.45376 |
| 120 | 1.05 | 2.5 | - | -184.4043961 | - | 0.43707 |
| 120 | 1.05 | 2.6 | - | -184.4046695 | - | 0.42963 |
| 120 | 1.05 | 2.7 | - | -184.4047151 | - | 0.42839 |
| 120 | 1.05 | 2.8 | - | -184.404613  | - | 0.43117 |
| 120 | 1.05 | 2.9 | - | -184.4044201 | - | 0.43642 |
| 120 | 1.05 | 3   | - | -184.4041754 | - | 0.44308 |
| 120 | 1.1  | 1.6 | - | -184.3905052 | - | 0.81504 |
| 120 | 1.1  | 1.7 | - | -184.3928524 | - | 0.75118 |
| 120 | 1.1  | 1.8 | - | -184.3967851 | - | 0.64417 |
| 120 | 1.1  | 1.9 | - | -184.4012016 | - | 0.52399 |
| 120 | 1.1  | 2   | - | -184.4051819 | - | 0.41569 |
| 120 | 1.1  | 2.1 | - | -184.4083207 | - | 0.33028 |
| 120 | 1.1  | 2.2 | - | -184.4105762 | - | 0.26891 |
| 120 | 1.1  | 2.3 | - | -184.4120724 | - | 0.2282  |
| 120 | 1.1  | 2.4 | - | -184.4129775 | - | 0.20357 |
| 120 | 1.1  | 2.5 | - | -184.4134505 | - | 0.1907  |
| 120 | 1.1  | 2.6 | - | -184.413622  | - | 0.18604 |
| 120 | 1.1  | 2.7 | - | -184.4135917 | - | 0.18686 |
| 120 | 1.1  | 2.8 | - | -184.4134329 | - | 0.19118 |
| 120 | 1.1  | 2.9 | - | -184.4131966 | - | 0.19761 |
| 120 | 1.1  | 3   | - | -184.4129187 | - | 0.20517 |
| 120 | 1.15 | 1.6 | - | -184.3961641 | - | 0.66107 |
| 120 | 1.15 | 1.7 | - | -184.3953214 | - | 0.684   |
| 120 | 1.15 | 1.8 | - | -184.3967158 | - | 0.64605 |
| 120 | 1.15 | 1.9 | - | -184.3993684 | - | 0.57388 |
| 120 | 1.15 | 2   | - | -184.4022097 | - | 0.49656 |
| 120 | 1.15 | 2.1 | - | -184.404631  | - | 0.43068 |
| 120 | 1.15 | 2.2 | - | -184.4064377 | - | 0.38152 |
| 120 | 1.15 | 2.3 | - | -184.4076498 | - | 0.34854 |
| 120 | 1.15 | 2.4 | - | -184.4083718 | - | 0.32889 |
| 120 | 1.15 | 2.5 | - | -184.408724  | - | 0.31931 |
| 120 | 1.15 | 2.6 | - | -184.4088134 | - | 0.31688 |
| 120 | 1.15 | 2.7 | - | -184.4087247 | - | 0.31929 |
| 120 | 1.15 | 2.8 | - | -184.4088153 | - | 0.31682 |
| 120 | 1.15 | 2.9 | - | -184.4085444 | - | 0.3242  |
| 120 | 1.15 | 3   | - | -184.4082344 | - | 0.33263 |
| 120 | 1.2  | 1.6 | - | -184.3926961 | - | 0.75543 |
| 120 | 1.2  | 1.7 | - | -184.3887432 | - | 0.86299 |
| 120 | 1.2  | 1.8 | - | -184.3874884 | - | 0.89713 |
| 120 | 1.2  | 1.9 | - | -184.3881846 | - | 0.87819 |
| 120 | 1.2  | 2   | - | -184.3896919 | - | 0.83717 |
| 120 | 1.2  | 2.1 | - | -184.3912195 | - | 0.79561 |
| 120 | 1.2  | 2.2 | - | -184.3924198 | - | 0.76295 |
| 120 | 1.2  | 2.3 | - | -184.3932127 | - | 0.74137 |
| 120 | 1.2  | 2.4 | - | -184.3936378 | - | 0.72981 |
| 120 | 1.2  | 2.5 | - | -184.3937752 | - | 0.72607 |
| 120 | 1.2  | 2.6 | - | -184.3937057 | - | 0.72796 |
| 120 | 1.2  | 2.7 | - | -184.3934988 | - | 0.73359 |
| 120 | 1.2  | 2.8 | - | -184.393209  | - | 0.74147 |
| 120 | 1.2  | 2.9 | - | -184.3928722 | - | 0.75064 |
| 120 | 1.2  | 3   | - | -184.3925173 | - | 0.7603  |
| 125 | 1    | 1.6 | - | -184.3365826 | - | 2.28228 |
| 125 | 1    | 1.7 | - | -184.344289  | - | 2.07259 |
| 125 | 1    | 1.8 | - | -184.3521811 | - | 1.85784 |
| 125 | 1    | 1.9 | - | -184.3591927 | - | 1.66706 |
| 125 | 1    | 2   | - | -184.364807  | - | 1.51429 |
| 125 | 1    | 2.1 | - | -184.3689863 | - | 1.40057 |
| 125 | 1    | 2.2 | - | -184.3719269 | - | 1.32056 |
| 125 | 1    | 2.3 | - | -184.3738916 | - | 1.2671  |
| 125 | 1    | 2.4 | - | -184.3751295 | - | 1.23342 |
| 125 | 1    | 2.5 | - | -184.3758461 | - | 1.21392 |
| 125 | 1    | 2.6 | - | -184.3762021 | - | 1.20423 |
| 125 | 1    | 2.7 | - | -184.3763148 | - | 1.20116 |
| 125 | 1    | 2.8 | - | -184.3762693 | - | 1.2024  |
| 125 | 1    | 2.9 | - | -184.3761246 | - | 1.20634 |
| 125 | 1    | 3   | - | -184.3759221 | - | 1.21185 |
| 125 | 1.05 | 1.6 | - | -184.3737734 | - | 1.27032 |
| 125 | 1.05 | 1.7 | - | -184.3785171 | - | 1.14124 |
| 125 | 1.05 | 1.8 | - | -184.3842826 | - | 0.98436 |
| 125 | 1.05 | 1.9 | - | -184.3898885 | - | 0.83182 |
| 125 | 1.05 | 2   | - | -184.3945947 | - | 0.70377 |



|     |      |      |              |              |         |         |
|-----|------|------|--------------|--------------|---------|---------|
| 125 | 1.05 | 2.1  | -            | -184.3981833 | -       | 0.60612 |
| 125 | 1.05 | 2.2  | -            | -184.400732  | -       | 0.53677 |
| 125 | 1.05 | 2.3  | -            | -184.4024302 | -       | 0.49057 |
| 125 | 1.05 | 2.4  | -            | -184.4034816 | -       | 0.46196 |
| 125 | 1.05 | 2.5  | -            | -184.4040649 | -       | 0.44608 |
| 125 | 1.05 | 2.6  | -            | -184.4043227 | -       | 0.43907 |
| 125 | 1.05 | 2.7  | -            | -184.4043623 | -       | 0.43799 |
| 125 | 1.05 | 2.8  | -            | -184.4042611 | -       | 0.44075 |
| 125 | 1.05 | 2.9  | -            | -184.4040735 | -       | 0.44585 |
| 125 | 1.05 | 3    | -            | -184.4038374 | -       | 0.45227 |
| 125 | 1.1  | 1.6  | -            | -184.3923507 | -       | 0.76483 |
| 125 | 1.1  | 1.7  | -            | -184.3941036 | -       | 0.71713 |
| 125 | 1.1  | 1.8  | -            | -184.3976414 | -       | 0.62087 |
| 125 | 1.1  | 1.9  | -            | -184.4017518 | -       | 0.50902 |
| 125 | 1.1  | 2    | -            | -184.4054827 | -       | 0.40751 |
| 125 | 1.1  | 2.1  | -            | -184.408426  | -       | 0.32742 |
| 125 | 1.1  | 2.2  | -            | -184.4105396 | -       | 0.26991 |
| 125 | 1.1  | 2.3  | -            | -184.411937  | -       | 0.23188 |
| 125 | 1.1  | 2.4  | -            | -184.4127764 | -       | 0.20904 |
| 125 | 1.1  | 2.5  | -            | -184.4132071 | -       | 0.19732 |
| 125 | 1.1  | 2.6  | -            | -184.4133529 | -       | 0.19336 |
| 125 | 1.1  | 2.7  | -            | -184.4133087 | -       | 0.19456 |
| 125 | 1.1  | 2.8  | -            | -184.4131438 | -       | 0.19905 |
| 125 | 1.1  | 2.9  | -            | -184.4129073 | -       | 0.20548 |
| 125 | 1.1  | 3    | -            | -184.412633  | -       | 0.21295 |
| 125 | 1.15 | 1.6  | -            | -184.3976996 | -       | 0.61928 |
| 125 | 1.15 | 1.7  | -            | -184.3964347 | -       | 0.6537  |
| 125 | 1.15 | 1.8  | -            | -184.3975887 | -       | 0.6223  |
| 125 | 1.15 | 1.9  | -            | -184.4000468 | -       | 0.55542 |
| 125 | 1.15 | 2    | -            | -184.4026959 | -       | 0.48333 |
| 125 | 1.15 | 2.1  | -            | -184.4049455 | -       | 0.42212 |
| 125 | 1.15 | 2.2  | -            | -184.4066044 | -       | 0.37698 |
| 125 | 1.15 | 2.3  | -            | -184.4077045 | -       | 0.34705 |
| 125 | 1.15 | 2.4  | -            | -184.4083431 | -       | 0.32967 |
| 125 | 1.15 | 2.5  | -            | -184.4086346 | -       | 0.32174 |
| 125 | 1.15 | 2.6  | -            | -184.4086819 | -       | 0.32046 |
| 125 | 1.15 | 2.7  | -            | -184.4088247 | -       | 0.31657 |
| 125 | 1.15 | 2.8  | -            | -184.4086082 | -       | 0.32246 |
| 125 | 1.15 | 2.9  | -            | -184.4083223 | -       | 0.33024 |
| 125 | 1.15 | 3    | -            | -184.4080068 | -       | 0.33882 |
| 125 | 1.2  | 1.6  | -            | -184.3938004 | -       | 0.72538 |
| 125 | 1.2  | 1.7  | -            | -184.3895722 | -       | 0.84043 |
| 125 | 1.2  | 1.8  | -            | -184.3882261 | -       | 0.87706 |
| 125 | 1.2  | 1.9  | -            | -184.3888464 | -       | 0.86018 |
| 125 | 1.2  | 2    | -            | -184.3902298 | -       | 0.82254 |
| 125 | 1.2  | 2.1  | -            | -184.3916085 | -       | 0.78502 |
| 125 | 1.2  | 2.2  | -            | -184.3926638 | -       | 0.75631 |
| 125 | 1.2  | 2.3  | -            | -184.3933359 | -       | 0.73802 |
| 125 | 1.2  | 2.4  | -            | -184.3936676 | -       | 0.72899 |
| 125 | 1.2  | 2.5  | -            | -184.3937364 | -       | 0.72712 |
| 125 | 1.2  | 2.6  | -            | -184.3936188 | -       | 0.73032 |
| 125 | 1.2  | 2.7  | -            | -184.3933793 | -       | 0.73684 |
| 125 | 1.2  | 2.8  | -            | -184.3930672 | -       | 0.74533 |
| 125 | 1.2  | 2.9  | -            | -184.3927179 | -       | 0.75484 |
| 125 | 1.2  | 3    | -            | -184.3923559 | -       | 0.76468 |
| 130 | 1    | 1.05 | -184.2015792 | -184.196156  | 5.95572 | 6.10329 |
| 130 | 1    | 1.1  | -184.2414547 | -184.2425533 | 4.87071 | 4.84081 |
| 130 | 1    | 1.15 | -184.2668211 | -184.2742225 | 4.18049 | 3.97909 |
| 130 | 1    | 1.2  | -184.2819095 | -184.2953395 | 3.76993 | 3.4045  |
| 130 | 1    | 1.25 | -184.2898604 | -184.3090574 | 3.55359 | 3.03124 |
| 130 | 1    | 1.3  | -184.2929784 | -184.3177562 | 3.46875 | 2.79454 |
| 130 | 1    | 1.35 | -184.2929232 | -184.3232289 | 3.47025 | 2.64563 |
| 130 | 1    | 1.4  | -184.2908613 | -184.3268135 | 3.52635 | 2.5481  |
| 130 | 1    | 1.45 | -184.2875921 | -184.3294895 | 3.61531 | 2.47528 |
| 130 | 1    | 1.5  | -184.2836552 | -184.331939  | 3.72243 | 2.40863 |
| 130 | 1    | 1.6  | -            | -184.3376196 | -       | 2.25406 |
| 130 | 1    | 1.7  | -            | -184.3447466 | -       | 2.06013 |
| 130 | 1    | 1.8  | -            | -184.3522846 | -       | 1.85503 |
| 130 | 1    | 1.9  | -            | -184.3590686 | -       | 1.67043 |
| 130 | 1    | 2    | -            | -184.3645348 | -       | 1.5217  |
| 130 | 1    | 2.1  | -            | -184.3686205 | -       | 1.41053 |
| 130 | 1    | 2.2  | -            | -184.3715056 | -       | 1.33202 |
| 130 | 1    | 2.3  | -            | -184.3734404 | -       | 1.27938 |

|     |      |      |              |              |         |         |
|-----|------|------|--------------|--------------|---------|---------|
| 130 | 1    | 2.4  | -            | -184.374665  | -       | 1.24606 |
| 130 | 1    | 2.5  | -            | -184.3753795 | -       | 1.22661 |
| 130 | 1    | 2.6  | -            | -184.3757402 | -       | 1.2168  |
| 130 | 1    | 2.7  | -            | -184.3758626 | -       | 1.21347 |
| 130 | 1    | 2.8  | -            | -184.37583   | -       | 1.21435 |
| 130 | 1    | 2.9  | -            | -184.3757006 | -       | 1.21788 |
| 130 | 1    | 3    | -            | -184.3755146 | -       | 1.22294 |
| 130 | 1.05 | 1    | -184.1911001 | -184.1869759 | 6.24086 | 6.35308 |
| 130 | 1.05 | 1.05 | -184.2486611 | -184.2516644 | 4.67462 | 4.5929  |
| 130 | 1.05 | 1.1  | -184.2862585 | -184.2962357 | 3.6516  | 3.38012 |
| 130 | 1.05 | 1.15 | -184.3095204 | -184.3261925 | 3.01864 | 2.56499 |
| 130 | 1.05 | 1.2  | -184.3226504 | -184.3456717 | 2.66137 | 2.03496 |
| 130 | 1.05 | 1.25 | -184.3287681 | -184.35779   | 2.49491 | 1.70522 |
| 130 | 1.05 | 1.3  | -184.330176  | -184.3648954 | 2.4566  | 1.51189 |
| 130 | 1.05 | 1.35 | -184.3285434 | -184.3687515 | 2.50102 | 1.40696 |
| 130 | 1.05 | 1.4  | -184.3250521 | -184.3706765 | 2.59602 | 1.35458 |
| 130 | 1.05 | 1.45 | -184.3205156 | -184.3716432 | 2.71946 | 1.32828 |
| 130 | 1.05 | 1.5  | -184.3154812 | -184.3723505 | 2.85645 | 1.30903 |
| 130 | 1.05 | 1.6  | -            | -184.3746496 | -       | 1.24647 |
| 130 | 1.05 | 1.7  | -            | -184.3789495 | -       | 1.12947 |
| 130 | 1.05 | 1.8  | -            | -184.384444  | -       | 0.97997 |
| 130 | 1.05 | 1.9  | -            | -184.3898618 | -       | 0.83255 |
| 130 | 1.05 | 2    | -            | -184.3944321 | -       | 0.70819 |
| 130 | 1.05 | 2.1  | -            | -184.3979258 | -       | 0.61313 |
| 130 | 1.05 | 2.2  | -            | -184.4004116 | -       | 0.54549 |
| 130 | 1.05 | 2.3  | -            | -184.4020708 | -       | 0.50034 |
| 130 | 1.05 | 2.4  | -            | -184.4031    | -       | 0.47234 |
| 130 | 1.05 | 2.5  | -            | -184.403673  | -       | 0.45675 |
| 130 | 1.05 | 2.6  | -            | -184.4039287 | -       | 0.44979 |
| 130 | 1.05 | 2.7  | -            | -184.4039719 | -       | 0.44862 |
| 130 | 1.05 | 2.8  | -            | -184.4038783 | -       | 0.45116 |
| 130 | 1.05 | 2.9  | -            | -184.4037015 | -       | 0.45597 |
| 130 | 1.05 | 3    | -            | -184.4034779 | -       | 0.46206 |
| 130 | 1.1  | 1    | -184.2211611 | -184.2242964 | 5.4229  | 5.33758 |
| 130 | 1.1  | 1.05 | -184.2764585 | -184.2871212 | 3.91825 | 3.62812 |
| 130 | 1.1  | 1.1  | -184.3119917 | -184.3299869 | 2.95139 | 2.46175 |
| 130 | 1.1  | 1.15 | -184.3333457 | -184.3583573 | 2.37035 | 1.68979 |
| 130 | 1.1  | 1.2  | -184.3446871 | -184.3763317 | 2.06175 | 1.2007  |
| 130 | 1.1  | 1.25 | -184.3491149 | -184.3869914 | 1.94127 | 0.91065 |
| 130 | 1.1  | 1.3  | -184.34892   | -184.392651  | 1.94658 | 0.75666 |
| 130 | 1.1  | 1.35 | -184.3457745 | -184.3950448 | 2.03217 | 0.69152 |
| 130 | 1.1  | 1.4  | -184.3408742 | -184.3954671 | 2.1655  | 0.68003 |
| 130 | 1.1  | 1.45 | -184.3350507 | -184.3948767 | 2.32396 | 0.69609 |
| 130 | 1.1  | 1.5  | -184.3288667 | -184.3939754 | 2.49223 | 0.72062 |
| 130 | 1.1  | 1.6  | -            | -184.3930376 | -       | 0.74614 |
| 130 | 1.1  | 1.7  | -            | -184.3944931 | -       | 0.70653 |
| 130 | 1.1  | 1.8  | -            | -184.3978721 | -       | 0.61459 |
| 130 | 1.1  | 1.9  | -            | -184.4018491 | -       | 0.50637 |
| 130 | 1.1  | 2    | -            | -184.4054569 | -       | 0.40821 |
| 130 | 1.1  | 2.1  | -            | -184.4082988 | -       | 0.33088 |
| 130 | 1.1  | 2.2  | -            | -184.4103357 | -       | 0.27546 |
| 130 | 1.1  | 2.3  | -            | -184.4116805 | -       | 0.23886 |
| 130 | 1.1  | 2.4  | -            | -184.4124854 | -       | 0.21696 |
| 130 | 1.1  | 2.5  | -            | -184.4128954 | -       | 0.20581 |
| 130 | 1.1  | 2.6  | -            | -184.4130303 | -       | 0.20213 |
| 130 | 1.1  | 2.7  | -            | -184.4129825 | -       | 0.20344 |
| 130 | 1.1  | 2.8  | -            | -184.4128194 | -       | 0.20787 |
| 130 | 1.1  | 2.9  | -            | -184.4125883 | -       | 0.21416 |
| 130 | 1.1  | 3    | -            | -184.4123221 | -       | 0.2214  |
| 130 | 1.15 | 1    | -184.2372618 | -184.2469141 | 4.9848  | 4.72216 |
| 130 | 1.15 | 1.05 | -184.2905138 | -184.3079817 | 3.53581 | 3.06051 |
| 130 | 1.15 | 1.1  | -184.3241896 | -184.3492469 | 2.61949 | 1.93768 |
| 130 | 1.15 | 1.15 | -184.3438255 | -184.3761368 | 2.0852  | 1.20601 |
| 130 | 1.15 | 1.2  | -184.3535528 | -184.3927187 | 1.82052 | 0.75481 |
| 130 | 1.15 | 1.25 | -184.3564454 | -184.4020432 | 1.74181 | 0.50109 |
| 130 | 1.15 | 1.3  | -184.3547759 | -184.4063934 | 1.78724 | 0.38272 |
| 130 | 1.15 | 1.35 | -184.3502116 | -184.4074721 | 1.91143 | 0.35337 |
| 130 | 1.15 | 1.4  | -184.3439569 | -184.406544  | 2.08162 | 0.37863 |
| 130 | 1.15 | 1.45 | -184.3368602 | -184.4045458 | 2.27472 | 0.433   |
| 130 | 1.15 | 1.5  | -184.3295027 | -184.4021696 | 2.47492 | 0.49766 |
| 130 | 1.15 | 1.6  | -            | -184.3981543 | -       | 0.60691 |
| 130 | 1.15 | 1.7  | -            | -184.3967326 | -       | 0.6456  |
| 130 | 1.15 | 1.8  | -            | -184.3978603 | -       | 0.61491 |

|     |      |      |              |              |         |         |
|-----|------|------|--------------|--------------|---------|---------|
| 130 | 1.15 | 1.9  | -            | -184.4002834 | -       | 0.54898 |
| 130 | 1.15 | 2    | -            | -184.4028638 | -       | 0.47877 |
| 130 | 1.15 | 2.1  | -            | -184.4050283 | -       | 0.41987 |
| 130 | 1.15 | 2.2  | -            | -184.4066103 | -       | 0.37682 |
| 130 | 1.15 | 2.3  | -            | -184.4076425 | -       | 0.34874 |
| 130 | 1.15 | 2.4  | -            | -184.4082283 | -       | 0.3328  |
| 130 | 1.15 | 2.5  | -            | -184.4084799 | -       | 0.32595 |
| 130 | 1.15 | 2.6  | -            | -184.4084976 | -       | 0.32547 |
| 130 | 1.15 | 2.7  | -            | -184.408585  | -       | 0.32309 |
| 130 | 1.15 | 2.8  | -            | -184.4083508 | -       | 0.32946 |
| 130 | 1.15 | 2.9  | -            | -184.4080605 | -       | 0.33736 |
| 130 | 1.15 | 3    | -            | -184.407746  | -       | 0.34592 |
| 130 | 1.2  | 1    | -184.2435528 | -184.2589949 | 4.81362 | 4.39344 |
| 130 | 1.2  | 1.05 | -184.2949744 | -184.318398  | 3.41444 | 2.77708 |
| 130 | 1.2  | 1.1  | -184.3270014 | -184.3581437 | 2.54298 | 1.6956  |
| 130 | 1.2  | 1.15 | -184.3451148 | -184.3836209 | 2.05012 | 1.00237 |
| 130 | 1.2  | 1.2  | -184.3534052 | -184.3988722 | 1.82454 | 0.58738 |
| 130 | 1.2  | 1.25 | -184.354919  | -184.4069316 | 1.78334 | 0.36808 |
| 130 | 1.2  | 1.3  | -184.3519106 | -184.4100606 | 1.8652  | 0.28294 |
| 130 | 1.2  | 1.35 | -184.3460361 | -184.4099331 | 2.02505 | 0.28641 |
| 130 | 1.2  | 1.4  | -184.3385006 | -184.40778   | 2.23009 | 0.34499 |
| 130 | 1.2  | 1.45 | -184.3301671 | -184.4045098 | 2.45684 | 0.43398 |
| 130 | 1.2  | 1.5  | -184.3216362 | -184.4007935 | 2.68897 | 0.5351  |
| 130 | 1.2  | 1.6  | -            | -184.393913  | -       | 0.72232 |
| 130 | 1.2  | 1.7  | -            | -184.3896427 | -       | 0.83851 |
| 130 | 1.2  | 1.8  | -            | -184.3883911 | -       | 0.87257 |
| 130 | 1.2  | 1.9  | -            | -184.3890723 | -       | 0.85403 |
| 130 | 1.2  | 2    | -            | -184.3904385 | -       | 0.81686 |
| 130 | 1.2  | 2.1  | -            | -184.3917548 | -       | 0.78104 |
| 130 | 1.2  | 2.2  | -            | -184.3927342 | -       | 0.75439 |
| 130 | 1.2  | 2.3  | -            | -184.3933347 | -       | 0.73805 |
| 130 | 1.2  | 2.4  | -            | -184.3936069 | -       | 0.73065 |
| 130 | 1.2  | 2.5  | -            | -184.3936298 | -       | 0.73002 |
| 130 | 1.2  | 2.6  | -            | -184.3934787 | -       | 0.73413 |
| 130 | 1.2  | 2.7  | -            | -184.3932165 | -       | 0.74127 |
| 130 | 1.2  | 2.8  | -            | -184.3928899 | -       | 0.75015 |
| 130 | 1.2  | 2.9  | -            | -184.3925322 | -       | 0.75989 |
| 130 | 1.2  | 3    | -            | -184.3921664 | -       | 0.76984 |
| 130 | 1.25 | 1    | -184.2431209 | -184.2637105 | 4.82537 | 4.26513 |
| 130 | 1.25 | 1.05 | -184.2929281 | -184.3215315 | 3.47012 | 2.69182 |
| 130 | 1.25 | 1.1  | -184.3235242 | -184.3598236 | 2.6376  | 1.64989 |
| 130 | 1.25 | 1.15 | -184.3403279 | -184.3839358 | 2.18037 | 0.9938  |
| 130 | 1.25 | 1.2  | -184.347381  | -184.3979086 | 1.98845 | 0.6136  |
| 130 | 1.25 | 1.25 | -184.3476964 | -184.4047776 | 1.97987 | 0.42669 |
| 130 | 1.25 | 1.3  | -184.3435063 | -184.4067839 | 2.09388 | 0.3721  |
| 130 | 1.25 | 1.35 | -184.3364481 | -184.4055674 | 2.28594 | 0.4052  |
| 130 | 1.25 | 1.4  | -184.3277215 | -184.4023304 | 2.52339 | 0.49328 |
| 130 | 1.25 | 1.45 | -184.3181955 | -184.397941  | 2.78259 | 0.61272 |
| 130 | 1.25 | 1.5  | -184.3084973 | -184.3930481 | 3.04648 | 0.74585 |
| 130 | 1.3  | 1    | -184.2382211 | -184.26345   | 4.95869 | 4.27221 |
| 130 | 1.3  | 1.05 | -184.2866133 | -184.3197667 | 3.64194 | 2.73984 |
| 130 | 1.3  | 1.1  | -184.3159939 | -184.3566646 | 2.8425  | 1.73584 |
| 130 | 1.3  | 1.15 | -184.3317101 | -184.3794619 | 2.41486 | 1.11553 |
| 130 | 1.3  | 1.2  | -184.3377493 | -184.3922388 | 2.25053 | 0.76787 |
| 130 | 1.3  | 1.25 | -184.3370875 | -184.3980212 | 2.26854 | 0.61053 |
| 130 | 1.3  | 1.3  | -184.3319326 | -184.3990141 | 2.4088  | 0.58352 |
| 130 | 1.3  | 1.35 | -184.3238996 | -184.3968291 | 2.62738 | 0.64297 |
| 130 | 1.3  | 1.4  | -184.3141528 | -184.392626  | 2.89259 | 0.75734 |
| 130 | 1.3  | 1.45 | -184.3035399 | -184.3872515 | 3.18137 | 0.90357 |
| 130 | 1.3  | 1.5  | -184.2926938 | -184.3813204 | 3.47649 | 1.06496 |
| 130 | 1.35 | 1    | -184.2304565 | -184.2599887 | 5.16997 | 4.3664  |
| 130 | 1.35 | 1.05 | -184.2775935 | -184.3148775 | 3.88737 | 2.87287 |
| 130 | 1.35 | 1.1  | -184.3059355 | -184.3504407 | 3.11618 | 1.9052  |
| 130 | 1.35 | 1.15 | -184.3207552 | -184.3719744 | 2.71294 | 1.31927 |
| 130 | 1.35 | 1.2  | -184.325985  | -184.3836514 | 2.57064 | 1.00153 |
| 130 | 1.35 | 1.25 | -184.3245654 | -184.3884628 | 2.60926 | 0.87062 |
| 130 | 1.35 | 1.3  | -184.3186881 | -184.3885354 | 2.76919 | 0.86864 |
| 130 | 1.35 | 1.35 | -184.3099597 | -184.3854644 | 3.00669 | 0.9522  |
| 130 | 1.35 | 1.4  | -184.2995219 | -184.3803927 | 3.2907  | 1.0902  |
| 130 | 1.35 | 1.45 | -184.2881587 | -184.3741326 | 3.59989 | 1.26054 |
| 130 | 1.35 | 1.5  | -184.2764193 | -184.3672737 | 3.91932 | 1.44717 |
| 130 | 1.4  | 1    | -184.2209505 | -184.2546222 | 5.42863 | 4.51242 |
| 130 | 1.4  | 1.05 | -184.266931  | -184.3081597 | 4.1775  | 3.05566 |

|     |      |      |              |              |         |         |
|-----|------|------|--------------|--------------|---------|---------|
| 130 | 1.4  | 1.1  | -184.2943466 | -184.3424439 | 3.43152 | 2.12279 |
| 130 | 1.4  | 1.15 | -184.3083955 | -184.3627489 | 3.04925 | 1.57029 |
| 130 | 1.4  | 1.2  | -184.3129542 | -184.3734585 | 2.92521 | 1.27888 |
| 130 | 1.4  | 1.25 | -184.3109307 | -184.3773816 | 2.98026 | 1.17213 |
| 130 | 1.4  | 1.3  | -184.3045095 | -184.3766172 | 3.15499 | 1.19294 |
| 130 | 1.4  | 1.35 | -184.2953124 | -184.3727316 | 3.40524 | 1.29866 |
| 130 | 1.4  | 1.4  | -184.2845076 | -184.3668591 | 3.69924 | 1.45845 |
| 130 | 1.4  | 1.45 | -184.2728662 | -184.3597924 | 4.016   | 1.65074 |
| 130 | 1.4  | 1.5  | -184.260824  | -184.352094  | 4.34367 | 1.86021 |
| 130 | 1.45 | 1    | -184.2104911 | -184.2482694 | 5.71323 | 4.68528 |
| 130 | 1.45 | 1.05 | -184.2553493 | -184.3005329 | 4.49263 | 3.26319 |
| 130 | 1.45 | 1.1  | -184.2818792 | -184.3335778 | 3.77076 | 2.36404 |
| 130 | 1.45 | 1.15 | -184.2952042 | -184.3527064 | 3.40818 | 1.84355 |
| 130 | 1.45 | 1.2  | -184.2991424 | -184.3625667 | 3.30102 | 1.57525 |
| 130 | 1.45 | 1.25 | -184.2965736 | -184.3656865 | 3.37092 | 1.49036 |
| 130 | 1.45 | 1.3  | -184.2896757 | -184.3641412 | 3.55861 | 1.53241 |
| 130 | 1.45 | 1.35 | -184.2800961 | -184.3594992 | 3.81928 | 1.65872 |
| 130 | 1.45 | 1.4  | -184.2690666 | -184.3528863 | 4.11939 | 1.83865 |
| 130 | 1.45 | 1.45 | -184.2574408 | -184.3450781 | 4.43572 | 2.05111 |
| 130 | 1.45 | 1.5  | -184.245657  | -184.3366153 | 4.75636 | 2.28139 |
| 130 | 1.5  | 1    | -184.1996406 | -184.241547  | 6.00847 | 4.86819 |
| 130 | 1.5  | 1.05 | -184.2433605 | -184.2926175 | 4.81885 | 3.47857 |
| 130 | 1.5  | 1.1  | -184.2689799 | -184.3242703 | 4.12175 | 2.6173  |
| 130 | 1.5  | 1.15 | -184.2815484 | -184.3425094 | 3.77976 | 2.12101 |
| 130 | 1.5  | 1.2  | -184.2848331 | -184.3515981 | 3.69038 | 1.87371 |
| 130 | 1.5  | 1.25 | -184.2816803 | -184.3539496 | 3.77617 | 1.80972 |
| 130 | 1.5  | 1.3  | -184.2742619 | -184.3516745 | 3.97802 | 1.87163 |
| 130 | 1.5  | 1.35 | -184.2642493 | -184.3463333 | 4.25047 | 2.01696 |
| 130 | 1.5  | 1.4  | -184.2529495 | -184.3390395 | 4.55793 | 2.21542 |
| 130 | 1.5  | 1.45 | -184.2413363 | -184.3305547 | 4.87393 | 2.4463  |
| 130 | 1.5  | 1.5  | -184.2300151 | -184.3213997 | 5.18198 | 2.6954  |
| 135 | 1    | 1    | -184.1701759 | -184.1465389 | 6.8102  | 7.45337 |
| 135 | 1    | 1.05 | -184.2274043 | -184.2099056 | 5.25302 | 5.72916 |
| 135 | 1    | 1.1  | -184.2646087 | -184.2534964 | 4.24069 | 4.54305 |
| 135 | 1    | 1.15 | -184.2874619 | -184.2827905 | 3.61885 | 3.74596 |
| 135 | 1    | 1.2  | -184.3001977 | -184.3019066 | 3.27231 | 3.22581 |
| 135 | 1    | 1.25 | -184.3059619 | -184.3139501 | 3.11547 | 2.89811 |
| 135 | 1    | 1.3  | -184.3070627 | -184.3212633 | 3.08551 | 2.69912 |
| 135 | 1    | 1.35 | -184.3051663 | -184.3256076 | 3.13711 | 2.58091 |
| 135 | 1    | 1.4  | -184.3014428 | -184.3282971 | 3.23843 | 2.50773 |
| 135 | 1    | 1.45 | -184.2966912 | -184.3302892 | 3.36772 | 2.45352 |
| 135 | 1    | 1.5  | -184.2914459 | -184.332242  | 3.51045 | 2.40038 |
| 135 | 1    | 1.6  | -            | -184.3373653 | -       | 2.26098 |
| 135 | 1    | 1.7  | -            | -184.344284  | -       | 2.07272 |
| 135 | 1    | 1.8  | -            | -184.3517515 | -       | 1.86953 |
| 135 | 1    | 1.9  | -            | -184.3585079 | -       | 1.68569 |
| 135 | 1    | 2    | -            | -184.3639623 | -       | 1.53728 |
| 135 | 1    | 2.1  | -            | -184.3680465 | -       | 1.42615 |
| 135 | 1    | 2.2  | -            | -184.3709384 | -       | 1.34746 |
| 135 | 1    | 2.3  | -            | -184.3728862 | -       | 1.29446 |
| 135 | 1    | 2.4  | -            | -184.3741271 | -       | 1.26069 |
| 135 | 1    | 2.5  | -            | -184.37486   | -       | 1.24075 |
| 135 | 1    | 2.6  | -            | -184.3752399 | -       | 1.23041 |
| 135 | 1    | 2.7  | -            | -184.3753824 | -       | 1.22653 |
| 135 | 1    | 2.8  | -            | -184.3753703 | -       | 1.22686 |
| 135 | 1    | 2.9  | -            | -184.3752617 | -       | 1.22982 |
| 135 | 1    | 3    | -            | -184.3750968 | -       | 1.23431 |
| 135 | 1.05 | 1    | -184.2173595 | -184.2010523 | 5.52634 | 5.97006 |
| 135 | 1.05 | 1.05 | -184.2724203 | -184.2629467 | 4.02813 | 4.28591 |
| 135 | 1.05 | 1.1  | -184.3076509 | -184.3051506 | 3.06951 | 3.13754 |
| 135 | 1.05 | 1.15 | -184.3286802 | -184.3331052 | 2.4973  | 2.3769  |
| 135 | 1.05 | 1.2  | -184.3397101 | -184.3508977 | 2.19718 | 1.89276 |
| 135 | 1.05 | 1.25 | -184.3438682 | -184.3616052 | 2.08403 | 1.60141 |
| 135 | 1.05 | 1.3  | -184.3434569 | -184.3675445 | 2.09523 | 1.4398  |
| 135 | 1.05 | 1.35 | -184.3401503 | -184.3704541 | 2.1852  | 1.36063 |
| 135 | 1.05 | 1.4  | -184.3351334 | -184.3716321 | 2.32171 | 1.32858 |
| 135 | 1.05 | 1.45 | -184.3292206 | -184.3720342 | 2.4826  | 1.31764 |
| 135 | 1.05 | 1.5  | -184.3229567 | -184.37234   | 2.65304 | 1.30932 |
| 135 | 1.05 | 1.6  | -            | -184.3742282 | -       | 1.25794 |
| 135 | 1.05 | 1.7  | -            | -184.3784306 | -       | 1.14359 |
| 135 | 1.05 | 1.8  | -            | -184.3839292 | -       | 0.99398 |
| 135 | 1.05 | 1.9  | -            | -184.3893607 | -       | 0.84618 |
| 135 | 1.05 | 2    | -            | -184.3939386 | -       | 0.72162 |

|     |      |      |              |              |         |         |
|-----|------|------|--------------|--------------|---------|---------|
| 135 | 1.05 | 2.1  | -            | -184.3974363 | -       | 0.62645 |
| 135 | 1.05 | 2.2  | -            | -184.3999274 | -       | 0.55867 |
| 135 | 1.05 | 2.3  | -            | -184.4015945 | -       | 0.5133  |
| 135 | 1.05 | 2.4  | -            | -184.4026342 | -       | 0.48501 |
| 135 | 1.05 | 2.5  | -            | -184.4032195 | -       | 0.46909 |
| 135 | 1.05 | 2.6  | -            | -184.4034891 | -       | 0.46175 |
| 135 | 1.05 | 2.7  | -            | -184.4035475 | -       | 0.46016 |
| 135 | 1.05 | 2.8  | -            | -184.4034703 | -       | 0.46226 |
| 135 | 1.05 | 2.9  | -            | -184.4033105 | -       | 0.46661 |
| 135 | 1.05 | 3    | -            | -184.4031044 | -       | 0.47222 |
| 135 | 1.1  | 1    | -184.2450339 | -184.2358321 | 4.77332 | 5.0237  |
| 135 | 1.1  | 1.05 | -184.2981284 | -184.2963056 | 3.32861 | 3.37821 |
| 135 | 1.1  | 1.1  | -184.3315736 | -184.3371775 | 2.41857 | 2.26609 |
| 135 | 1.1  | 1.15 | -184.3509549 | -184.3638593 | 1.89121 | 1.54008 |
| 135 | 1.1  | 1.2  | -184.3604394 | -184.3804093 | 1.63313 | 1.08975 |
| 135 | 1.1  | 1.25 | -184.3631268 | -184.3898768 | 1.56001 | 0.83214 |
| 135 | 1.1  | 1.3  | -184.3613102 | -184.3945516 | 1.60944 | 0.70494 |
| 135 | 1.1  | 1.35 | -184.3566644 | -184.3961483 | 1.73585 | 0.66149 |
| 135 | 1.1  | 1.4  | -184.3503865 | -184.3959457 | 1.90667 | 0.66701 |
| 135 | 1.1  | 1.45 | -184.343308  | -184.3948886 | 2.09928 | 0.69577 |
| 135 | 1.1  | 1.5  | -184.3359898 | -184.3936636 | 2.29841 | 0.7291  |
| 135 | 1.1  | 1.6  | -            | -184.3924415 | -       | 0.76236 |
| 135 | 1.1  | 1.7  | -            | -184.3939161 | -       | 0.72223 |
| 135 | 1.1  | 1.8  | -            | -184.3973869 | -       | 0.62779 |
| 135 | 1.1  | 1.9  | -            | -184.4014224 | -       | 0.51798 |
| 135 | 1.1  | 2    | -            | -184.4050525 | -       | 0.41921 |
| 135 | 1.1  | 2.1  | -            | -184.4078999 | -       | 0.34173 |
| 135 | 1.1  | 2.2  | -            | -184.4099382 | -       | 0.28627 |
| 135 | 1.1  | 2.3  | -            | -184.4112847 | -       | 0.24963 |
| 135 | 1.1  | 2.4  | -            | -184.4120932 | -       | 0.22763 |
| 135 | 1.1  | 2.5  | -            | -184.412509  | -       | 0.21632 |
| 135 | 1.1  | 2.6  | -            | -184.412652  | -       | 0.21243 |
| 135 | 1.1  | 2.7  | -            | -184.4126144 | -       | 0.21345 |
| 135 | 1.1  | 2.8  | -            | -184.412463  | -       | 0.21757 |
| 135 | 1.1  | 2.9  | -            | -184.412245  | -       | 0.2235  |
| 135 | 1.1  | 3    | -            | -184.4119926 | -       | 0.23037 |
| 135 | 1.15 | 1    | -184.2587766 | -184.2562543 | 4.39938 | 4.46801 |
| 135 | 1.15 | 1.05 | -184.310084  | -184.3153431 | 3.0033  | 2.8602  |
| 135 | 1.15 | 1.1  | -184.3419203 | -184.3549297 | 2.13704 | 1.78305 |
| 135 | 1.15 | 1.15 | -184.359821  | -184.3803991 | 1.64996 | 1.09003 |
| 135 | 1.15 | 1.2  | -184.3679156 | -184.395784  | 1.42971 | 0.67141 |
| 135 | 1.15 | 1.25 | -184.3692763 | -184.4041077 | 1.39268 | 0.44492 |
| 135 | 1.15 | 1.3  | -184.3661773 | -184.4076322 | 1.477   | 0.34902 |
| 135 | 1.15 | 1.35 | -184.3602886 | -184.4080438 | 1.63724 | 0.33782 |
| 135 | 1.15 | 1.4  | -184.3528116 | -184.4065959 | 1.84068 | 0.37721 |
| 135 | 1.15 | 1.45 | -184.344594  | -184.4042139 | 2.06429 | 0.44203 |
| 135 | 1.15 | 1.5  | -184.3362143 | -184.4015783 | 2.2923  | 0.51374 |
| 135 | 1.15 | 1.6  | -            | -184.3973768 | -       | 0.62807 |
| 135 | 1.15 | 1.7  | -            | -184.3960756 | -       | 0.66347 |
| 135 | 1.15 | 1.8  | -            | -184.3974095 | -       | 0.62718 |
| 135 | 1.15 | 1.9  | -            | -184.3999782 | -       | 0.55728 |
| 135 | 1.15 | 2    | -            | -184.4026307 | -       | 0.48511 |
| 135 | 1.15 | 2.1  | -            | -184.4048187 | -       | 0.42557 |
| 135 | 1.15 | 2.2  | -            | -184.4064003 | -       | 0.38254 |
| 135 | 1.15 | 2.3  | -            | -184.4074229 | -       | 0.35471 |
| 135 | 1.15 | 2.4  | -            | -184.4079962 | -       | 0.33911 |
| 135 | 1.15 | 2.5  | -            | -184.4082376 | -       | 0.33255 |
| 135 | 1.15 | 2.6  | -            | -184.4084206 | -       | 0.32757 |
| 135 | 1.15 | 2.7  | -            | -184.4082822 | -       | 0.33133 |
| 135 | 1.15 | 2.8  | -            | -184.4080484 | -       | 0.33769 |
| 135 | 1.15 | 2.9  | -            | -184.4077645 | -       | 0.34542 |
| 135 | 1.15 | 3    | -            | -184.4074592 | -       | 0.35373 |
| 135 | 1.2  | 1    | -184.2627547 | -184.2663775 | 4.29113 | 4.19256 |
| 135 | 1.2  | 1.05 | -184.3124451 | -184.3241103 | 2.93906 | 2.62165 |
| 135 | 1.2  | 1.1  | -184.3428378 | -184.3624385 | 2.11207 | 1.57874 |
| 135 | 1.2  | 1.15 | -184.3594199 | -184.3867178 | 1.66087 | 0.9181  |
| 135 | 1.2  | 1.2  | -184.3662791 | -184.4009627 | 1.47424 | 0.53049 |
| 135 | 1.2  | 1.25 | -184.3664564 | -184.4081839 | 1.46941 | 0.33401 |
| 135 | 1.2  | 1.3  | -184.3622035 | -184.4106246 | 1.58513 | 0.26759 |
| 135 | 1.2  | 1.35 | -184.3551763 | -184.4099443 | 1.77634 | 0.28611 |
| 135 | 1.2  | 1.4  | -184.346579  | -184.407363  | 2.01027 | 0.35634 |
| 135 | 1.2  | 1.45 | -184.3372704 | -184.4037801 | 2.26356 | 0.45383 |
| 135 | 1.2  | 1.5  | -184.3278458 | -184.3998616 | 2.52    | 0.56045 |

|     |      |      |              |              |         |         |
|-----|------|------|--------------|--------------|---------|---------|
| 135 | 1.2  | 1.6  | -            | -184.3928702 | -       | 0.75069 |
| 135 | 1.2  | 1.7  | -            | -184.3887918 | -       | 0.86167 |
| 135 | 1.2  | 1.8  | -            | -184.3878315 | -       | 0.88779 |
| 135 | 1.2  | 1.9  | -            | -184.3887312 | -       | 0.86331 |
| 135 | 1.2  | 2    | -            | -184.39021   | -       | 0.82307 |
| 135 | 1.2  | 2.1  | -            | -184.3915703 | -       | 0.78606 |
| 135 | 1.2  | 2.2  | -            | -184.3925567 | -       | 0.75922 |
| 135 | 1.2  | 2.3  | -            | -184.3931495 | -       | 0.74309 |
| 135 | 1.2  | 2.4  | -            | -184.39341   | -       | 0.736   |
| 135 | 1.2  | 2.5  | -            | -184.3934211 | -       | 0.7357  |
| 135 | 1.2  | 2.6  | -            | -184.3932614 | -       | 0.74005 |
| 135 | 1.2  | 2.7  | -            | -184.3929942 | -       | 0.74732 |
| 135 | 1.2  | 2.8  | -            | -184.3926662 | -       | 0.75624 |
| 135 | 1.2  | 2.9  | -            | -184.3923098 | -       | 0.76594 |
| 135 | 1.2  | 3    | -            | -184.3919474 | -       | 0.7758  |
| 135 | 1.25 | 1    | -184.2600783 | -184.2693161 | 4.36396 | 4.1126  |
| 135 | 1.25 | 1.05 | -184.3083177 | -184.3257247 | 3.05136 | 2.57772 |
| 135 | 1.25 | 1.1  | -184.3374425 | -184.3628135 | 2.25888 | 1.56854 |
| 135 | 1.25 | 1.15 | -184.3528806 | -184.3859095 | 1.83881 | 0.94009 |
| 135 | 1.25 | 1.2  | -184.3586701 | -184.3990339 | 1.68128 | 0.58298 |
| 135 | 1.25 | 1.25 | -184.3578144 | -184.4052018 | 1.70456 | 0.41515 |
| 135 | 1.25 | 1.3  | -184.3525403 | -184.4066364 | 1.84807 | 0.37611 |
| 135 | 1.25 | 1.35 | -184.3444847 | -184.4049683 | 2.06726 | 0.4215  |
| 135 | 1.25 | 1.4  | -184.3348478 | -184.4013843 | 2.32948 | 0.51902 |
| 135 | 1.25 | 1.45 | -184.324499  | -184.3967531 | 2.61107 | 0.64504 |
| 135 | 1.25 | 1.5  | -184.3140521 | -184.3917129 | 2.89533 | 0.78218 |
| 135 | 1.3  | 1    | -184.2530426 | -184.267445  | 4.5554  | 4.16351 |
| 135 | 1.3  | 1.05 | -184.2999973 | -184.3225663 | 3.27776 | 2.66366 |
| 135 | 1.3  | 1.1  | -184.3280401 | -184.3584406 | 2.51472 | 1.68752 |
| 135 | 1.3  | 1.15 | -184.3425309 | -184.3803783 | 2.12042 | 1.09059 |
| 135 | 1.3  | 1.2  | -184.347448  | -184.3924475 | 1.98663 | 0.76219 |
| 135 | 1.3  | 1.25 | -184.3457508 | -184.3976509 | 2.03281 | 0.62061 |
| 135 | 1.3  | 1.3  | -184.3396313 | -184.3981774 | 2.19932 | 0.60628 |
| 135 | 1.3  | 1.35 | -184.3307022 | -184.3956253 | 2.44228 | 0.67572 |
| 135 | 1.3  | 1.4  | -184.3201391 | -184.3911538 | 2.72971 | 0.79739 |
| 135 | 1.3  | 1.45 | -184.308808  | -184.3855972 | 3.03802 | 0.94859 |
| 135 | 1.3  | 1.5  | -184.2973449 | -184.379567  | 3.34993 | 1.11267 |
| 135 | 1.35 | 1    | -184.2432996 | -184.2625329 | 4.82051 | 4.29717 |
| 135 | 1.35 | 1.05 | -184.289114  | -184.3164103 | 3.5739  | 2.83117 |
| 135 | 1.35 | 1.1  | -184.3162453 | -184.3511003 | 2.83566 | 1.88725 |
| 135 | 1.35 | 1.15 | -184.3299786 | -184.3719123 | 2.46197 | 1.32096 |
| 135 | 1.35 | 1.2  | -184.3342308 | -184.3830093 | 2.34627 | 1.01901 |
| 135 | 1.35 | 1.25 | -184.3319111 | -184.3873381 | 2.40939 | 0.90122 |
| 135 | 1.35 | 1.3  | -184.3251825 | -184.3870359 | 2.59247 | 0.90944 |
| 135 | 1.35 | 1.35 | -184.3156331 | -184.3836767 | 2.85231 | 1.00085 |
| 135 | 1.35 | 1.4  | -184.3044067 | -184.3783987 | 3.15778 | 1.14446 |
| 135 | 1.35 | 1.45 | -184.292316  | -184.3720093 | 3.48677 | 1.31832 |
| 135 | 1.35 | 1.5  | -184.2799592 | -184.3650929 | 3.823   | 1.50651 |
| 135 | 1.4  | 1    | -184.232002  | -184.2558682 | 5.12791 | 4.47852 |
| 135 | 1.4  | 1.05 | -184.2767742 | -184.3085519 | 3.90966 | 3.04499 |
| 135 | 1.4  | 1.1  | -184.3031123 | -184.3420916 | 3.193   | 2.13238 |
| 135 | 1.4  | 1.15 | -184.3162296 | -184.3617994 | 2.83608 | 1.59613 |
| 135 | 1.4  | 1.2  | -184.3199757 | -184.3720228 | 2.73415 | 1.31795 |
| 135 | 1.4  | 1.25 | -184.3172165 | -184.3755614 | 2.80923 | 1.22166 |
| 135 | 1.4  | 1.3  | -184.310089  | -184.3744929 | 3.00317 | 1.25074 |
| 135 | 1.4  | 1.35 | -184.30018   | -184.3703818 | 3.27279 | 1.3626  |
| 135 | 1.4  | 1.4  | -184.2886357 | -184.3643558 | 3.58691 | 1.52657 |
| 135 | 1.4  | 1.45 | -184.2762346 | -184.3572016 | 3.92435 | 1.72123 |
| 135 | 1.4  | 1.5  | -184.2634713 | -184.3494775 | 4.27164 | 1.93141 |
| 135 | 1.45 | 1    | -184.2199441 | -184.248364  | 5.45601 | 4.68271 |
| 135 | 1.45 | 1.05 | -184.2637138 | -184.2999119 | 4.26504 | 3.28009 |
| 135 | 1.45 | 1.1  | -184.2893098 | -184.3323254 | 3.56857 | 2.39812 |
| 135 | 1.45 | 1.15 | -184.3018761 | -184.3509565 | 3.22664 | 1.89116 |
| 135 | 1.45 | 1.2  | -184.3051983 | -184.3604331 | 3.13624 | 1.63331 |
| 135 | 1.45 | 1.25 | -184.3020953 | -184.3632348 | 3.22068 | 1.55707 |
| 135 | 1.45 | 1.3  | -184.2946896 | -184.3614443 | 3.42219 | 1.60579 |
| 135 | 1.45 | 1.35 | -184.2845728 | -184.3566252 | 3.69746 | 1.73692 |
| 135 | 1.45 | 1.4  | -184.2729341 | -184.3498967 | 4.01415 | 1.92    |
| 135 | 1.45 | 1.45 | -184.2605926 | -184.3420293 | 4.34996 | 2.13407 |
| 135 | 1.45 | 1.5  | -184.2480131 | -184.3335593 | 4.69225 | 2.36454 |
| 135 | 1.5  | 1    | -184.2076763 | -184.2406377 | 5.78982 | 4.89294 |
| 135 | 1.5  | 1.05 | -184.2504331 | -184.2911058 | 4.6264  | 3.5197  |
| 135 | 1.5  | 1.1  | -184.2752731 | -184.3222451 | 3.95051 | 2.6724  |

|     |      |      |              |              |         |         |
|-----|------|------|--------------|--------------|---------|---------|
| 135 | 1.5  | 1.15 | -184.2872799 | -184.3400804 | 3.6238  | 2.1871  |
| 135 | 1.5  | 1.2  | -184.2901748 | -184.3488536 | 3.54503 | 1.94838 |
| 135 | 1.5  | 1.25 | -184.2867346 | -184.3509466 | 3.63864 | 1.89143 |
| 135 | 1.5  | 1.3  | -184.2790589 | -184.3484704 | 3.8475  | 1.95881 |
| 135 | 1.5  | 1.35 | -184.2687451 | -184.342984  | 4.12814 | 2.10809 |
| 135 | 1.5  | 1.4  | -184.2570499 | -184.3355966 | 4.44636 | 2.30911 |
| 135 | 1.5  | 1.45 | -184.2449003 | -184.3270643 | 4.77695 | 2.54127 |
| 135 | 1.5  | 1.5  | -184.2328439 | -184.3179046 | 5.10501 | 2.7905  |
| 140 | 1    | 1    | -184.1945953 | -184.1612727 | 6.14575 | 7.05246 |
| 140 | 1    | 1.05 | -184.249443  | -184.2212984 | 4.65335 | 5.41916 |
| 140 | 1    | 1.1  | -184.2844024 | -184.262005  | 3.7021  | 4.31153 |
| 140 | 1    | 1.15 | -184.3051464 | -184.2888891 | 3.13766 | 3.58002 |
| 140 | 1    | 1.2  | -184.315909  | -184.3060202 | 2.8448  | 3.11388 |
| 140 | 1    | 1.25 | -184.3198374 | -184.3164483 | 2.73791 | 2.83013 |
| 140 | 1    | 1.3  | -184.3192437 | -184.3224693 | 2.75407 | 2.6663  |
| 140 | 1    | 1.35 | -184.3157974 | -184.325808  | 2.84784 | 2.57545 |
| 140 | 1    | 1.4  | -184.310671  | -184.3277515 | 2.98733 | 2.52257 |
| 140 | 1    | 1.5  | -184.2983053 | -184.330886  | 3.3238  | 2.43728 |
| 140 | 1    | 1.6  | -            | -184.3358703 | -       | 2.30166 |
| 140 | 1    | 1.7  | -            | -184.3429559 | -       | 2.10886 |
| 140 | 1    | 1.8  | -            | -184.350635  | -       | 1.89991 |
| 140 | 1    | 1.9  | -            | -184.3575563 | -       | 1.71158 |
| 140 | 1    | 2    | -            | -184.3631268 | -       | 1.56001 |
| 140 | 1.05 | 1    | -184.2396598 | -184.2126553 | 4.91955 | 5.65434 |
| 140 | 1.05 | 1.05 | -184.2926123 | -184.2716451 | 3.47871 | 4.04923 |
| 140 | 1.05 | 1.1  | -184.3258505 | -184.3114407 | 2.5743  | 2.96639 |
| 140 | 1.05 | 1.15 | -184.3450039 | -184.3374159 | 2.05313 | 2.2596  |
| 140 | 1.05 | 1.2  | -184.3542743 | -184.3535921 | 1.80089 | 1.81945 |
| 140 | 1.05 | 1.25 | -184.3567885 | -184.3629919 | 1.73247 | 1.56368 |
| 140 | 1.05 | 1.3  | -184.3548553 | -184.3678903 | 1.78508 | 1.43039 |
| 140 | 1.05 | 1.35 | -184.3501471 | -184.3699948 | 1.91319 | 1.37313 |
| 140 | 1.05 | 1.4  | -184.3438516 | -184.3705814 | 2.08449 | 1.35717 |
| 140 | 1.05 | 1.45 | -184.3367835 | -184.3705884 | 2.27681 | 1.35698 |
| 140 | 1.05 | 1.5  | -184.3294851 | -184.3706777 | 2.4754  | 1.35455 |
| 140 | 1.05 | 1.6  | -            | -184.3725475 | -       | 1.30367 |
| 140 | 1.05 | 1.7  | -            | -184.3770103 | -       | 1.18224 |
| 140 | 1.05 | 1.8  | -            | -184.3827901 | -       | 1.02497 |
| 140 | 1.05 | 1.9  | -            | -184.388432  | -       | 0.87145 |
| 140 | 1.05 | 2    | -            | -184.3931516 | -       | 0.74303 |
| 140 | 1.1  | 1    | -184.3266213 | -184.2446925 | 2.55332 | 4.78261 |
| 140 | 1.1  | 1.05 | -184.3164808 | -184.3027595 | 2.82925 | 3.2026  |
| 140 | 1.1  | 1.1  | -184.3481658 | -184.3416607 | 1.9671  | 2.1441  |
| 140 | 1.1  | 1.15 | -184.3658869 | -184.3667303 | 1.48491 | 1.46196 |
| 140 | 1.1  | 1.2  | -184.3738112 | -184.381966  | 1.26929 | 1.04739 |
| 140 | 1.1  | 1.25 | -184.3750398 | -184.3903714 | 1.23586 | 0.81868 |
| 140 | 1.1  | 1.3  | -184.371867  | -184.3942022 | 1.32219 | 0.71445 |
| 140 | 1.1  | 1.35 | -184.3659682 | -184.39515   | 1.48269 | 0.68866 |
| 140 | 1.1  | 1.4  | -184.3585411 | -184.3944759 | 1.68479 | 0.707   |
| 140 | 1.1  | 1.45 | -184.3504163 | -184.393113  | 1.90586 | 0.74409 |
| 140 | 1.1  | 1.5  | -184.3421524 | -184.3917342 | 2.13072 | 0.7816  |
| 140 | 1.1  | 1.6  | -            | -184.3905838 | -       | 0.8129  |
| 140 | 1.1  | 1.7  | -            | -184.3924117 | -       | 0.76317 |
| 140 | 1.1  | 1.8  | -            | -184.3962363 | -       | 0.6591  |
| 140 | 1.1  | 1.9  | -            | -184.400522  | -       | 0.54249 |
| 140 | 1.1  | 2    | -            | -184.4043138 | -       | 0.43931 |
| 140 | 1.15 | 1    | -184.3271956 | -184.2628407 | 2.5377  | 4.28879 |
| 140 | 1.15 | 1.05 | -184.3266213 | -184.3199705 | 2.55332 | 2.73429 |
| 140 | 1.15 | 1.1  | -184.3569037 | -184.3579589 | 1.72934 | 1.70063 |
| 140 | 1.15 | 1.15 | -184.3733393 | -184.3821223 | 1.28213 | 1.04314 |
| 140 | 1.15 | 1.2  | -184.3800573 | -184.3964421 | 1.09933 | 0.6535  |
| 140 | 1.15 | 1.25 | -184.3801305 | -184.4039041 | 1.09734 | 0.45046 |
| 140 | 1.15 | 1.3  | -184.3758338 | -184.4067438 | 1.21425 | 0.37319 |
| 140 | 1.15 | 1.35 | -184.3688367 | -184.4066306 | 1.40464 | 0.37627 |
| 140 | 1.15 | 1.4  | -184.3603407 | -184.4048048 | 1.63582 | 0.42595 |
| 140 | 1.15 | 1.45 | -184.3511911 | -184.4021838 | 1.88478 | 0.49727 |
| 140 | 1.15 | 1.5  | -184.3419628 | -184.399439  | 2.13588 | 0.57195 |
| 140 | 1.15 | 1.6  | -            | -184.3953597 | -       | 0.68295 |
| 140 | 1.15 | 1.7  | -            | -184.3944877 | -       | 0.70668 |
| 140 | 1.15 | 1.8  | -            | -184.3962824 | -       | 0.65785 |
| 140 | 1.15 | 1.9  | -            | -184.3991847 | -       | 0.57887 |
| 140 | 1.15 | 2    | -            | -184.4020442 | -       | 0.50107 |
| 140 | 1.2  | 1    | -184.278955  | -184.271083  | 3.85032 | 4.06452 |
| 140 | 1.2  | 1.05 | -184.3271956 | -184.3272201 | 2.5377  | 2.53703 |

|     |      |      |              |              |         |         |
|-----|------|------|--------------|--------------|---------|---------|
| 140 | 1.2  | 1.1  | -184.3562126 | -184.364246  | 1.74814 | 1.52956 |
| 140 | 1.2  | 1.15 | -184.3714985 | -184.387462  | 1.33221 | 0.89785 |
| 140 | 1.2  | 1.2  | -184.3771443 | -184.4008415 | 1.17859 | 0.53379 |
| 140 | 1.2  | 1.25 | -184.3761903 | -184.4073646 | 1.20455 | 0.3563  |
| 140 | 1.2  | 1.3  | -184.3708877 | -184.4092525 | 1.34884 | 0.30493 |
| 140 | 1.2  | 1.35 | -184.3628919 | -184.4081482 | 1.5664  | 0.33498 |
| 140 | 1.2  | 1.4  | -184.3534054 | -184.4052641 | 1.82453 | 0.41345 |
| 140 | 1.2  | 1.45 | -184.3432831 | -184.4014922 | 2.09996 | 0.51609 |
| 140 | 1.2  | 1.5  | -184.3331142 | -184.3974931 | 2.37665 | 0.6249  |
| 140 | 1.2  | 1.6  | -            | -184.390645  | -       | 0.81124 |
| 140 | 1.2  | 1.7  | -            | -184.3870199 | -       | 0.90988 |
| 140 | 1.2  | 1.8  | -            | -184.3865785 | -       | 0.92189 |
| 140 | 1.2  | 1.9  | -            | -184.3878681 | -       | 0.8868  |
| 140 | 1.2  | 2    | -            | -184.3895899 | -       | 0.83995 |
| 140 | 1.2  | 2.1  | -            | -184.3910901 | -       | 0.79913 |
| 140 | 1.2  | 2.2  | -            | -184.3921602 | -       | 0.77001 |
| 140 | 1.2  | 2.3  | -            | -184.3928013 | -       | 0.75257 |
| 140 | 1.2  | 2.4  | -            | -184.3930911 | -       | 0.74468 |
| 140 | 1.2  | 2.5  | -            | -184.3931212 | -       | 0.74386 |
| 140 | 1.2  | 2.6  | -            | -184.3929759 | -       | 0.74782 |
| 140 | 1.2  | 2.7  | -            | -184.3927207 | -       | 0.75476 |
| 140 | 1.2  | 2.8  | -            | -184.3924039 | -       | 0.76338 |
| 140 | 1.2  | 2.9  | -            | -184.3920586 | -       | 0.77278 |
| 140 | 1.2  | 3    | -            | -184.3917067 | -       | 0.78235 |
| 140 | 1.25 | 1    | -184.2743835 | -184.2724049 | 3.97471 | 4.02855 |
| 140 | 1.25 | 1.05 | -184.3213204 | -184.3274965 | 2.69756 | 2.52951 |
| 140 | 1.25 | 1.1  | -184.3492053 | -184.3635044 | 1.93881 | 1.54974 |
| 140 | 1.25 | 1.15 | -184.3634802 | -184.3857175 | 1.55039 | 0.94532 |
| 140 | 1.25 | 1.2  | -184.3681889 | -184.3981303 | 1.42227 | 0.60756 |
| 140 | 1.25 | 1.25 | -184.3663351 | -184.4037306 | 1.47271 | 0.45518 |
| 140 | 1.25 | 1.3  | -184.3601427 | -184.4047225 | 1.64121 | 0.42819 |
| 140 | 1.25 | 1.35 | -184.3512483 | -184.4027203 | 1.88322 | 0.48267 |
| 140 | 1.25 | 1.4  | -184.3408504 | -184.3989046 | 2.16615 | 0.5865  |
| 140 | 1.25 | 1.45 | -184.3298128 | -184.3941373 | 2.46648 | 0.71621 |
| 140 | 1.25 | 1.5  | -184.3187378 | -184.389055  | 2.76783 | 0.8545  |
| 140 | 1.25 | 1.6  | -            | -184.3797611 | -       | 1.10739 |
| 140 | 1.25 | 1.7  | -            | -184.373568  | -       | 1.27591 |
| 140 | 1.25 | 1.8  | -            | -184.3709433 | -       | 1.34732 |
| 140 | 1.25 | 1.9  | -            | -184.370646  | -       | 1.35541 |
| 140 | 1.25 | 2    | -            | -184.3712698 | -       | 1.33844 |
| 140 | 1.3  | 1    | -184.2655475 | -184.2691109 | 4.21514 | 4.11818 |
| 140 | 1.3  | 1.05 | -184.3113091 | -184.3231406 | 2.96997 | 2.64803 |
| 140 | 1.3  | 1.1  | -184.3382111 | -184.3581097 | 2.23797 | 1.69652 |
| 140 | 1.3  | 1.15 | -184.3516372 | -184.3793185 | 1.87264 | 1.11943 |
| 140 | 1.3  | 1.2  | -184.3555738 | -184.3908152 | 1.76553 | 0.80661 |
| 140 | 1.3  | 1.25 | -184.3529768 | -184.3955678 | 1.83619 | 0.67729 |
| 140 | 1.3  | 1.3  | -184.346034  | -184.3957458 | 2.0251  | 0.67245 |
| 140 | 1.3  | 1.35 | -184.336356  | -184.392938  | 2.28844 | 0.74885 |
| 140 | 1.3  | 1.4  | -184.3251267 | -184.3882955 | 2.59399 | 0.87517 |
| 140 | 1.3  | 1.45 | -184.3132163 | -184.3826502 | 2.91807 | 1.02878 |
| 140 | 1.3  | 1.5  | -184.3012527 | -184.3766122 | 3.2436  | 1.19307 |
| 140 | 1.3  | 1.6  | -            | -184.3651325 | -       | 1.50543 |
| 140 | 1.3  | 1.7  | -            | -184.3565516 | -       | 1.73892 |
| 140 | 1.3  | 1.8  | -            | -184.3517798 | -       | 1.86876 |
| 140 | 1.3  | 1.9  | -            | -184.3498695 | -       | 1.92074 |
| 140 | 1.3  | 2    | -            | -184.3493682 | -       | 1.93438 |
| 140 | 1.35 | 1    | -184.2541274 | -184.2629538 | 4.52588 | 4.28572 |
| 140 | 1.35 | 1.05 | -184.2988383 | -184.3159278 | 3.3093  | 2.84429 |
| 140 | 1.35 | 1.1  | -184.3249133 | -184.3498543 | 2.5998  | 1.92115 |
| 140 | 1.35 | 1.15 | -184.3376724 | -184.3700701 | 2.25262 | 1.37108 |
| 140 | 1.35 | 1.2  | -184.3410349 | -184.3807118 | 2.16113 | 1.08152 |
| 140 | 1.35 | 1.25 | -184.3379026 | -184.3846851 | 2.24636 | 0.97341 |
| 140 | 1.35 | 1.3  | -184.3304216 | -184.3841126 | 2.44992 | 0.98899 |
| 140 | 1.35 | 1.35 | -184.3201691 | -184.380562  | 2.72889 | 1.0856  |
| 140 | 1.35 | 1.4  | -184.3082927 | -184.3751657 | 3.05204 | 1.23243 |
| 140 | 1.35 | 1.45 | -184.2956316 | -184.3687284 | 3.39655 | 1.40759 |
| 140 | 1.35 | 1.5  | -184.2828103 | -184.3618331 | 3.74542 | 1.59521 |
| 140 | 1.35 | 1.6  | -            | -184.3483829 | -       | 1.96119 |
| 140 | 1.35 | 1.7  | -            | -184.3375807 | -       | 2.25512 |
| 140 | 1.35 | 1.8  | -            | -184.330683  | -       | 2.44281 |
| 140 | 1.35 | 1.9  | -            | -184.3271001 | -       | 2.5403  |
| 140 | 1.35 | 2    | -            | -184.3254169 | -       | 2.5861  |
| 140 | 1.4  | 1    | -184.2413073 | -184.2552116 | 4.87472 | 4.49638 |



|     |      |      |              |              |         |         |
|-----|------|------|--------------|--------------|---------|---------|
| 140 | 1.4  | 1.05 | -184.2850616 | -184.3071501 | 3.68416 | 3.08313 |
| 140 | 1.4  | 1.1  | -184.3104351 | -184.3400347 | 2.99375 | 2.18834 |
| 140 | 1.4  | 1.15 | -184.3226788 | -184.3592558 | 2.6606  | 1.66534 |
| 140 | 1.4  | 1.2  | -184.3256457 | -184.3691233 | 2.57987 | 1.39684 |
| 140 | 1.4  | 1.25 | -184.3221814 | -184.3723784 | 2.67413 | 1.30827 |
| 140 | 1.4  | 1.3  | -184.314396  | -184.3711003 | 2.88597 | 1.34305 |
| 140 | 1.4  | 1.35 | -184.3038473 | -184.366851  | 3.17301 | 1.45867 |
| 140 | 1.4  | 1.4  | -184.2916669 | -184.3607508 | 3.50443 | 1.62466 |
| 140 | 1.4  | 1.45 | -184.2786453 | -184.3535817 | 3.85875 | 1.81973 |
| 140 | 1.4  | 1.5  | -184.2653279 | -184.3459003 | 4.22112 | 2.02874 |
| 140 | 1.4  | 1.6  | -            | -184.3306505 | -       | 2.44369 |
| 140 | 1.4  | 1.7  | -            | -184.3177815 | -       | 2.79386 |
| 140 | 1.4  | 1.8  | -            | -184.3088056 | -       | 3.03809 |
| 140 | 1.4  | 1.9  | -            | -184.3034755 | -       | 3.18312 |
| 140 | 1.45 | 1    | -184.2278907 | -184.2467844 | 5.23978 | 4.72569 |
| 140 | 1.45 | 1.05 | -184.2707348 | -184.297717  | 4.07399 | 3.33981 |
| 140 | 1.45 | 1.1  | -184.2954673 | -184.3295538 | 3.40102 | 2.47353 |
| 140 | 1.45 | 1.15 | -184.307281  | -184.3477943 | 3.07957 | 1.97721 |
| 140 | 1.45 | 1.2  | -184.309958  | -184.3569853 | 3.00673 | 1.72712 |
| 140 | 1.45 | 1.25 | -184.3062947 | -184.3595601 | 3.10641 | 1.65706 |
| 140 | 1.45 | 1.3  | -184.2983658 | -184.35761   | 3.32216 | 1.71012 |
| 140 | 1.45 | 1.35 | -184.2877281 | -184.3526935 | 3.61161 | 1.8439  |
| 140 | 1.45 | 1.4  | -184.2755318 | -184.3459229 | 3.94347 | 2.02813 |
| 140 | 1.45 | 1.45 | -184.2625816 | -184.3380629 | 4.29584 | 2.242   |
| 140 | 1.45 | 1.5  | -184.2493674 | -184.3296468 | 4.6554  | 2.471   |
| 140 | 1.45 | 1.6  | -            | -184.3127322 | -       | 2.93125 |
| 140 | 1.45 | 1.7  | -            | -184.2979591 | -       | 3.33322 |
| 140 | 1.45 | 1.8  | -            | -184.2869833 | -       | 3.63187 |
| 140 | 1.45 | 1.9  | -            | -184.2798722 | -       | 3.82537 |
| 140 | 1.5  | 1    | -184.2144209 | -184.2382774 | 5.6063  | 4.95716 |
| 140 | 1.5  | 1.05 | -184.2563502 | -184.2882361 | 4.4654  | 3.59779 |
| 140 | 1.5  | 1.1  | -184.2804394 | -184.3186395 | 3.80993 | 2.77051 |
| 140 | 1.5  | 1.15 | -184.2918274 | -184.336385  | 3.50006 | 2.28765 |
| 140 | 1.5  | 1.2  | -184.2942409 | -184.3449125 | 3.43439 | 2.05562 |
| 140 | 1.5  | 1.25 | -184.2904151 | -184.3468211 | 3.5385  | 2.00369 |
| 140 | 1.5  | 1.3  | -184.2823998 | -184.344226  | 3.75659 | 2.0743  |
| 140 | 1.5  | 1.35 | -184.2717503 | -184.3386692 | 4.04636 | 2.2255  |
| 140 | 1.5  | 1.4  | -184.2596655 | -184.3312571 | 4.37519 | 2.42718 |
| 140 | 1.5  | 1.45 | -184.2470171 | -184.3227406 | 4.71935 | 2.65892 |
| 140 | 1.5  | 1.5  | -184.2343415 | -184.3136329 | 5.06426 | 2.90674 |
| 140 | 1.5  | 1.6  | -            | -184.2951937 | -       | 3.40847 |
| 140 | 1.5  | 1.7  | -            | -184.2787075 | -       | 3.85706 |
| 140 | 1.5  | 1.8  | -            | -184.2658819 | -       | 4.20604 |
| 140 | 1.5  | 1.9  | -            | -184.2570317 | -       | 4.44686 |
| 145 | 1    | 1    | -184.2151991 | -184.1743131 | 5.58512 | 6.69763 |
| 145 | 1    | 1.05 | -184.2680552 | -184.2311304 | 4.14691 | 5.15163 |
| 145 | 1    | 1.1  | -184.3011382 | -184.2689436 | 3.24672 | 4.12273 |
| 145 | 1    | 1.15 | -184.3201212 | -184.2932707 | 2.73019 | 3.46079 |
| 145 | 1    | 1.2  | -184.3292376 | -            | 2.48213 | -       |
| 145 | 1    | 1.25 | -184.3316346 | -184.317015  | 2.41691 | 2.81471 |
| 145 | 1    | 1.3  | -184.3296277 | -184.3217226 | 2.47152 | 2.68662 |
| 145 | 1    | 1.35 | -184.3248871 | -184.3240885 | 2.60051 | 2.62224 |
| 145 | 1    | 1.4  | -184.3185878 | -184.3253698 | 2.77192 | 2.58738 |
| 145 | 1    | 1.45 | -184.3115284 | -184.3264753 | 2.964   | 2.5573  |
| 145 | 1    | 1.5  | -184.3042352 | -184.3280015 | 3.16245 | 2.51577 |
| 145 | 1.05 | 1    | -184.2584159 | -184.2226923 | 4.40919 | 5.38123 |
| 145 | 1.05 | 1.05 | -184.3096025 | -184.2786977 | 3.01641 | 3.85732 |
| 145 | 1.05 | 1.1  | -184.3411741 | -184.3158794 | 2.15734 | 2.84561 |
| 145 | 1.05 | 1.15 | -184.358761  | -184.3397272 | 1.6788  | 2.19671 |
| 145 | 1.05 | 1.2  | -184.3665647 | -184.3542137 | 1.46647 | 1.80253 |
| 145 | 1.05 | 1.25 | -184.367712  | -184.3622953 | 1.43525 | 1.58263 |
| 145 | 1.05 | 1.3  | -184.3645105 | -184.3661896 | 1.52236 | 1.47667 |
| 145 | 1.05 | 1.35 | -184.3586383 | -184.3675645 | 1.68214 | 1.43926 |
| 145 | 1.05 | 1.4  | -184.3512799 | -184.3676687 | 1.88236 | 1.43642 |
| 145 | 1.05 | 1.45 | -184.343251  | -184.3674225 | 2.10083 | 1.44312 |
| 145 | 1.05 | 1.5  | -184.3350911 | -184.3674674 | 2.32286 | 1.4419  |
| 145 | 1.1  | 1    | -184.2821906 | -184.2518804 | 3.76228 | 4.58702 |
| 145 | 1.1  | 1.05 | -184.3318682 | -184.3072762 | 2.41056 | 3.0797  |
| 145 | 1.1  | 1.1  | -184.36208   | -184.3440375 | 1.58849 | 2.07943 |
| 145 | 1.1  | 1.15 | -184.3784147 | -184.3674208 | 1.14402 | 1.44317 |
| 145 | 1.1  | 1.2  | -184.3850387 | -184.3813394 | 0.96379 | 1.06444 |
| 145 | 1.1  | 1.25 | -184.3850542 | -184.3887287 | 0.96336 | 0.86338 |
| 145 | 1.1  | 1.3  | -184.3807561 | -184.3917946 | 1.08032 | 0.77996 |

|     |      |      |              |              |         |         |
|-----|------|------|--------------|--------------|---------|---------|
| 145 | 1.1  | 1.35 | -184.373819  | -184.392194  | 1.26907 | 0.76909 |
| 145 | 1.1  | 1.4  | -184.3654405 | -184.3911677 | 1.49705 | 0.79702 |
| 145 | 1.1  | 1.45 | -184.3564504 | -184.3896367 | 1.74167 | 0.83867 |
| 145 | 1.1  | 1.5  | -184.3474048 | -184.388265  | 1.9878  | 0.876   |
| 145 | 1.15 | 1    | -184.2921405 | -184.2674675 | 3.49155 | 4.1629  |
| 145 | 1.15 | 1.05 | -184.3404415 | -184.3224333 | 2.17728 | 2.66728 |
| 145 | 1.15 | 1.1  | -184.3694255 | -184.3587396 | 1.38862 | 1.67938 |
| 145 | 1.15 | 1.15 | -184.3846374 | -184.3815964 | 0.97471 | 1.05745 |
| 145 | 1.15 | 1.2  | -184.3902079 | -184.3949027 | 0.82313 | 0.69539 |
| 145 | 1.15 | 1.25 | -184.3892104 | -184.4015854 | 0.85028 | 0.51355 |
| 145 | 1.15 | 1.3  | -184.3839202 | -184.403841  | 0.99422 | 0.45218 |
| 145 | 1.15 | 1.35 | -184.3760056 | -184.4033143 | 1.20958 | 0.46651 |
| 145 | 1.15 | 1.4  | -184.3666679 | -184.4012331 | 1.46366 | 0.52314 |
| 145 | 1.15 | 1.45 | -184.3567498 | -184.3985059 | 1.73353 | 0.59734 |
| 145 | 1.15 | 1.5  | -184.3468231 | -184.3957975 | 2.00363 | 0.67104 |
| 145 | 1.2  | 1    | -184.2924609 | -184.2736474 | 3.48283 | 3.99474 |
| 145 | 1.2  | 1.05 | -184.3394966 | -184.3281016 | 2.20299 | 2.51305 |
| 145 | 1.2  | 1.1  | -184.367366  | -184.3638369 | 1.44466 | 1.54069 |
| 145 | 1.2  | 1.15 | -184.3815713 | -184.3860565 | 1.05813 | 0.93609 |
| 145 | 1.2  | 1.2  | -184.3862046 | -184.3986639 | 0.93206 | 0.59304 |
| 145 | 1.2  | 1.25 | -184.3843083 | -184.4045927 | 0.98366 | 0.43172 |
| 145 | 1.2  | 1.3  | -184.378133  | -184.4060342 | 1.15169 | 0.3925  |
| 145 | 1.2  | 1.35 | -184.3693337 | -184.404613  | 1.39112 | 0.43117 |
| 145 | 1.2  | 1.4  | -184.3591113 | -184.4015316 | 1.66927 | 0.51502 |
| 145 | 1.2  | 1.45 | -184.3483173 | -184.3976792 | 1.96298 | 0.61984 |
| 145 | 1.2  | 1.5  | -184.3375365 | -184.3937165 | 2.25632 | 0.72766 |
| 145 | 1.25 | 1    | -184.2862845 | -184.2733494 | 3.65089 | 4.00285 |
| 145 | 1.25 | 1.05 | -184.3321509 | -184.3271231 | 2.40286 | 2.53967 |
| 145 | 1.25 | 1.1  | -184.3590103 | -184.3621027 | 1.67202 | 1.58787 |
| 145 | 1.25 | 1.15 | -184.3723184 | -184.3835163 | 1.3099  | 1.00521 |
| 145 | 1.25 | 1.2  | -184.3761258 | -184.3953178 | 1.20631 | 0.68409 |
| 145 | 1.25 | 1.25 | -184.3734389 | -184.4004571 | 1.27942 | 0.54425 |
| 145 | 1.25 | 1.3  | -184.3664812 | -184.4011095 | 1.46874 | 0.5265  |
| 145 | 1.25 | 1.35 | -184.3568896 | -184.398873  | 1.72972 | 0.58736 |
| 145 | 1.25 | 1.4  | -184.345859  | -184.394921  | 2.02987 | 0.69489 |
| 145 | 1.25 | 1.45 | -184.334249  | -184.3901167 | 2.34578 | 0.82561 |
| 145 | 1.25 | 1.5  | -184.3226542 | -184.385092  | 2.66127 | 0.96234 |
| 145 | 1.3  | 1    | -184.2759329 | -184.2687304 | 3.93255 | 4.12853 |
| 145 | 1.3  | 1.05 | -184.3207234 | -184.3216895 | 2.71381 | 2.68752 |
| 145 | 1.3  | 1.1  | -184.3466833 | -184.3558149 | 2.00744 | 1.75897 |
| 145 | 1.3  | 1.15 | -184.3592185 | -184.3763966 | 1.66635 | 1.19894 |
| 145 | 1.3  | 1.2  | -184.3623285 | -184.3874332 | 1.58173 | 0.89863 |
| 145 | 1.3  | 1.25 | -184.3589753 | -184.3918437 | 1.67297 | 0.77862 |
| 145 | 1.3  | 1.3  | -184.3513467 | -184.3917743 | 1.88055 | 0.78051 |
| 145 | 1.3  | 1.35 | -184.3410542 | -184.3888032 | 2.16061 | 0.86136 |
| 145 | 1.3  | 1.4  | -184.3292844 | -184.3840767 | 2.48086 | 0.98996 |
| 145 | 1.3  | 1.45 | -184.3169039 | -184.3784268 | 2.81773 | 1.1437  |
| 145 | 1.3  | 1.5  | -184.3045256 | -184.3724646 | 3.15455 | 1.30593 |
| 145 | 1.35 | 1    | -184.2631018 | -184.2614644 | 4.28169 | 4.32624 |
| 145 | 1.35 | 1.05 | -184.3069121 | -184.313562  | 3.08961 | 2.90867 |
| 145 | 1.35 | 1.1  | -184.3321001 | -184.3467837 | 2.40425 | 2.0047  |
| 145 | 1.35 | 1.15 | -184.3440191 | -184.3665279 | 2.07993 | 1.46747 |
| 145 | 1.35 | 1.2  | -184.3466081 | -184.3768387 | 2.00948 | 1.18691 |
| 145 | 1.35 | 1.25 | -184.342771  | -184.38056   | 2.11389 | 1.08565 |
| 145 | 1.35 | 1.3  | -184.3346474 | -184.3798099 | 2.33493 | 1.10606 |
| 145 | 1.35 | 1.35 | -184.3238106 | -184.3761514 | 2.6298  | 1.20561 |
| 145 | 1.35 | 1.4  | -184.3114151 | -184.3707131 | 2.96708 | 1.35358 |
| 145 | 1.35 | 1.45 | -184.2983174 | -184.3642999 | 3.32347 | 1.52809 |
| 145 | 1.35 | 1.5  | -184.2851526 | -184.3574958 | 3.68169 | 1.71323 |
| 145 | 1.4  | 1    | -184.248994  | -184.2528102 | 4.66556 | 4.56172 |
| 145 | 1.4  | 1.05 | -184.2919079 | -184.3040386 | 3.49788 | 3.1678  |
| 145 | 1.4  | 1.1  | -184.3164469 | -184.3362891 | 2.83017 | 2.29026 |
| 145 | 1.4  | 1.15 | -184.3279112 | -184.3551895 | 2.51822 | 1.77598 |
| 145 | 1.4  | 1.2  | -184.3301715 | -184.3648222 | 2.45672 | 1.51388 |
| 145 | 1.4  | 1.25 | -184.3260683 | -184.367886  | 2.56837 | 1.43051 |
| 145 | 1.4  | 1.3  | -184.3176949 | -184.3664828 | 2.79621 | 1.46869 |
| 145 | 1.4  | 1.35 | -184.3065909 | -184.362169  | 3.09835 | 1.58607 |
| 145 | 1.4  | 1.4  | -184.2938776 | -184.356061  | 3.44428 | 1.75227 |
| 145 | 1.4  | 1.45 | -184.2803619 | -184.3489393 | 3.81204 | 1.94605 |
| 145 | 1.4  | 1.5  | -184.2666267 | -184.3413606 | 4.18578 | 2.15227 |
| 145 | 1.45 | 1    | -184.2344296 | -184.2436546 | 5.06186 | 4.81085 |
| 145 | 1.45 | 1.05 | -184.2764965 | -184.2940219 | 3.91722 | 3.44035 |
| 145 | 1.45 | 1.1  | -184.3004609 | -184.3251188 | 3.26515 | 2.59421 |

|     |      |      |              |              |         |         |
|-----|------|------|--------------|--------------|---------|---------|
| 145 | 1.45 | 1.15 | -184.3115747 | -184.3433254 | 2.96274 | 2.09881 |
| 145 | 1.45 | 1.2  | -184.3136387 | -184.3523079 | 2.90658 | 1.85439 |
| 145 | 1.45 | 1.25 | -184.3094331 | -184.3547285 | 3.02102 | 1.78853 |
| 145 | 1.45 | 1.3  | -184.30101   | -184.3526877 | 3.25021 | 1.84406 |
| 145 | 1.45 | 1.35 | -184.2898934 | -184.3477392 | 3.55269 | 1.97871 |
| 145 | 1.45 | 1.4  | -184.2772071 | -184.3409865 | 3.89788 | 2.16245 |
| 145 | 1.45 | 1.45 | -184.2637473 | -184.3331894 | 4.26413 | 2.37461 |
| 145 | 1.45 | 1.5  | -184.250035  | -184.3248791 | 4.63724 | 2.60073 |
| 145 | 1.5  | 1    | -184.2199502 | -184.2345959 | 5.45584 | 5.05734 |
| 145 | 1.5  | 1.05 | -184.2611727 | -184.2840946 | 4.33418 | 3.71047 |
| 145 | 1.5  | 1.1  | -184.2845701 | -184.3141489 | 3.69754 | 2.8927  |
| 145 | 1.5  | 1.15 | -184.2953542 | -            | 3.4041  | -       |
| 145 | 1.5  | 1.2  | -184.2972673 | -184.3398876 | 3.35205 | 2.19235 |
| 145 | 1.5  | 1.25 | -184.2930308 | -184.3416592 | 3.46732 | 2.14414 |
| 145 | 1.5  | 1.3  | -184.2846575 | -184.3389976 | 3.69516 | 2.21656 |
| 145 | 1.5  | 1.35 | -184.2736635 | -184.3334317 | 3.99431 | 2.36801 |
| 145 | 1.5  | 1.4  | -184.2612031 | -184.3260521 | 4.33335 | 2.56881 |
| 145 | 1.5  | 1.45 | -184.248119  | -184.3176019 | 4.68937 | 2.79874 |
| 145 | 1.5  | 1.5  | -184.2349391 | -184.3085922 | 5.048   | 3.0439  |
| 150 | 1    | 1    | -184.2323612 | -184.1862004 | 5.11814 | 6.37418 |
| 150 | 1    | 1.05 | -184.2835677 | -184.2399582 | 3.72481 | 4.91143 |
| 150 | 1    | 1.1  | -184.3150972 | -184.2749266 | 2.8669  | 3.95994 |
| 150 | 1    | 1.15 | -184.3326233 | -184.2967369 | 2.39001 | 3.36648 |
| 150 | 1    | 1.2  | -184.3403795 | -184.3094827 | 2.17896 | 3.01966 |
| 150 | 1    | 1.25 | -184.3415129 | -184.3163018 | 2.14812 | 2.83412 |
| 150 | 1    | 1.3  | -184.3383395 | -184.319527  | 2.23447 | 2.74636 |
| 150 | 1    | 1.35 | -184.3325308 | -184.320828  | 2.39253 | 2.71096 |
| 150 | 1    | 1.4  | -184.3252629 | -184.3214357 | 2.59029 | 2.69442 |
| 150 | 1    | 1.45 | -184.3173341 | -184.3222348 | 2.80603 | 2.67268 |
| 150 | 1    | 1.5  | -184.3092674 | -184.3237796 | 3.02552 | 2.63065 |
| 150 | 1    | 1.6  | -            | -184.3297067 | -       | 2.46937 |
| 150 | 1    | 1.7  | -            | -184.3382387 | -       | 2.23721 |
| 150 | 1    | 1.8  | -            | -184.3471151 | -       | 1.99569 |
| 150 | 1    | 1.9  | -            | -184.35485   | -       | 1.78522 |
| 150 | 1    | 2    | -            | -184.3609529 | -       | 1.61916 |
| 150 | 1    | 2.1  | -            | -184.3654783 | -       | 1.49602 |
| 150 | 1    | 2.2  | -            | -184.3686846 | -       | 1.40878 |
| 150 | 1    | 2.3  | -            | -184.3708671 | -       | 1.3494  |
| 150 | 1    | 2.4  | -            | -184.3722896 | -       | 1.31069 |
| 150 | 1    | 2.5  | -            | -184.3731681 | -       | 1.28678 |
| 150 | 1    | 2.6  | -            | -184.3736695 | -       | 1.27314 |
| 150 | 1    | 2.7  | -            | -184.3739177 | -       | 1.26639 |
| 150 | 1    | 2.8  | -            | -184.3740006 | -       | 1.26413 |
| 150 | 1    | 2.9  | -            | -184.37398   | -       | 1.26469 |
| 150 | 1    | 3    | -            | -184.3738963 | -       | 1.26697 |
| 150 | 1.05 | 1    | -184.2739939 | -184.2316474 | 3.98531 | 5.13756 |
| 150 | 1.05 | 1.05 | -184.3237158 | -184.284818  | 2.63238 | 3.69079 |
| 150 | 1.05 | 1.1  | -184.3539068 | -184.3193944 | 1.81089 | 2.74997 |
| 150 | 1.05 | 1.15 | -184.3701983 | -184.3408452 | 1.36759 | 2.16629 |
| 150 | 1.05 | 1.2  | -184.3767916 | -184.3533976 | 1.18819 | 1.82474 |
| 150 | 1.05 | 1.25 | -184.3768131 | -184.3600003 | 1.18761 | 1.64508 |
| 150 | 1.05 | 1.3  | -184.37257   | -184.3628086 | 1.30306 | 1.56867 |
| 150 | 1.05 | 1.35 | -184.3657399 | -184.3634369 | 1.48891 | 1.55157 |
| 150 | 1.05 | 1.4  | -184.3575084 | -184.3631011 | 1.71289 | 1.56071 |
| 150 | 1.05 | 1.45 | -184.3486902 | -184.3627029 | 1.95283 | 1.57154 |
| 150 | 1.05 | 1.5  | -184.3398225 | -184.3628612 | 2.19412 | 1.56724 |
| 150 | 1.05 | 1.6  | -            | -184.365901  | -       | 1.48452 |
| 150 | 1.05 | 1.7  | -            | -184.3719839 | -       | 1.31901 |
| 150 | 1.05 | 1.8  | -            | -184.3791158 | -       | 1.12495 |
| 150 | 1.05 | 1.9  | -            | -184.3856843 | -       | 0.94622 |
| 150 | 1.05 | 2    | -            | -184.3910039 | -       | 0.80147 |
| 150 | 1.05 | 2.1  | -            | -184.3949904 | -       | 0.693   |
| 150 | 1.05 | 2.2  | -            | -184.3978165 | -       | 0.6161  |
| 150 | 1.05 | 2.3  | -            | -184.3997237 | -       | 0.56421 |
| 150 | 1.05 | 2.4  | -            | -184.4009429 | -       | 0.53103 |
| 150 | 1.05 | 2.5  | -            | -184.4016685 | -       | 0.51129 |
| 150 | 1.05 | 2.6  | -            | -184.4020532 | -       | 0.50082 |
| 150 | 1.05 | 2.7  | -            | -184.4022104 | -       | 0.49654 |
| 150 | 1.05 | 2.8  | -            | -184.4022213 | -       | 0.49625 |
| 150 | 1.05 | 2.9  | -            | -184.4021422 | -       | 0.4984  |
| 150 | 1.05 | 3    | -            | -184.4020106 | -       | 0.50198 |
| 150 | 1.1  | 1    | -184.2962216 | -184.2581701 | 3.3805  | 4.41588 |
| 150 | 1.1  | 1.05 | -184.3446049 | -184.3108583 | 2.06399 | 2.98223 |

|     |      |      |              |              |         |         |
|-----|------|------|--------------|--------------|---------|---------|
| 150 | 1.1  | 1.1  | -184.3735969 | -184.3451264 | 1.27512 | 2.0498  |
| 150 | 1.1  | 1.15 | -184.3887857 | -184.3665608 | 0.86183 | 1.46657 |
| 150 | 1.1  | 1.2  | -184.3943385 | -184.379007  | 0.71074 | 1.12791 |
| 150 | 1.1  | 1.25 | -184.3933573 | -184.3853089 | 0.73744 | 0.95643 |
| 150 | 1.1  | 1.3  | -184.3881359 | -184.3875984 | 0.87951 | 0.89414 |
| 150 | 1.1  | 1.35 | -184.3803486 | -184.387483  | 1.0914  | 0.89728 |
| 150 | 1.1  | 1.4  | -184.371192  | -184.3861755 | 1.34055 | 0.93285 |
| 150 | 1.1  | 1.45 | -184.3614948 | -184.3845867 | 1.60442 | 0.97609 |
| 150 | 1.1  | 1.5  | -184.3518107 | -184.383373  | 1.86792 | 1.00911 |
| 150 | 1.1  | 1.6  | -            | -184.3835142 | -       | 1.00527 |
| 150 | 1.1  | 1.7  | -            | -184.3871242 | -       | 0.90704 |
| 150 | 1.1  | 1.8  | -            | -184.392424  | -       | 0.76283 |
| 150 | 1.1  | 1.9  | -            | -184.3977247 | -       | 0.6186  |
| 150 | 1.1  | 2    | -            | -184.4021756 | -       | 0.49749 |
| 150 | 1.1  | 2.1  | -            | -184.4055574 | -       | 0.40547 |
| 150 | 1.1  | 2.2  | -            | -184.4079536 | -       | 0.34027 |
| 150 | 1.1  | 2.3  | -            | -184.4095489 | -       | 0.29686 |
| 150 | 1.1  | 2.4  | -            | -184.4105378 | -       | 0.26996 |
| 150 | 1.1  | 2.5  | -            | -184.4110907 | -       | 0.25491 |
| 150 | 1.1  | 2.6  | -            | -184.4113437 | -       | 0.24803 |
| 150 | 1.1  | 2.7  | -            | -184.4113991 | -       | 0.24652 |
| 150 | 1.1  | 2.8  | -            | -184.4113296 | -       | 0.24841 |
| 150 | 1.1  | 2.9  | -            | -184.4111854 | -       | 0.25233 |
| 150 | 1.1  | 3    | -            | -184.4110005 | -       | 0.25736 |
| 150 | 1.15 | 1    | -184.304676  | -184.2712208 | 3.15045 | 4.06077 |
| 150 | 1.15 | 1.05 | -184.3518411 | -184.3235747 | 1.86709 | 2.63622 |
| 150 | 1.15 | 1.1  | -184.3797507 | -184.3578968 | 1.10767 | 1.70232 |
| 150 | 1.15 | 1.15 | -184.3939532 | -184.3792805 | 0.72122 | 1.12047 |
| 150 | 1.15 | 1.2  | -184.3985795 | -184.3915063 | 0.59534 | 0.7878  |
| 150 | 1.15 | 1.25 | -184.3967036 | -184.3974078 | 0.64638 | 0.62722 |
| 150 | 1.15 | 1.3  | -184.3906    | -184.3991185 | 0.81246 | 0.58068 |
| 150 | 1.15 | 1.35 | -184.381936  | -184.3982444 | 1.04821 | 0.60446 |
| 150 | 1.15 | 1.4  | -184.371912  | -184.3959939 | 1.32096 | 0.6657  |
| 150 | 1.15 | 1.45 | -184.3613682 | -184.3932704 | 1.60786 | 0.7398  |
| 150 | 1.15 | 1.5  | -184.3508744 | -184.3907374 | 1.8934  | 0.80872 |
| 150 | 1.15 | 1.6  | -            | -184.3879435 | -       | 0.88475 |
| 150 | 1.15 | 1.7  | -            | -184.3890181 | -       | 0.85551 |
| 150 | 1.15 | 1.8  | -            | -184.3925318 | -       | 0.7599  |
| 150 | 1.15 | 1.9  | -            | -184.3966083 | -       | 0.64898 |
| 150 | 1.15 | 2    | -            | -184.4001581 | -       | 0.55239 |
| 150 | 1.15 | 2.1  | -            | -184.4028194 | -       | 0.47997 |
| 150 | 1.15 | 2.2  | -            | -184.4047044 | -       | 0.42868 |
| 150 | 1.15 | 2.3  | -            | -184.4059334 | -       | 0.39524 |
| 150 | 1.15 | 2.4  | -            | -184.4066539 | -       | 0.37564 |
| 150 | 1.15 | 2.5  | -            | -184.4070062 | -       | 0.36605 |
| 150 | 1.15 | 2.6  | -            | -184.4071073 | -       | 0.3633  |
| 150 | 1.15 | 2.7  | -            | -184.4070446 | -       | 0.36501 |
| 150 | 1.15 | 2.8  | -            | -184.4068816 | -       | 0.36944 |
| 150 | 1.15 | 2.9  | -            | -184.406662  | -       | 0.37542 |
| 150 | 1.15 | 3    | -            | -184.4065497 | -       | 0.37847 |
| 150 | 1.2  | 1    | -184.3035687 | -184.2749379 | 3.18058 | 3.95963 |
| 150 | 1.2  | 1.05 | -184.3496093 | -184.3273428 | 1.92782 | 2.53369 |
| 150 | 1.2  | 1.1  | -184.3765345 | -184.3616124 | 1.19519 | 1.60122 |
| 150 | 1.2  | 1.15 | -184.3898507 | -184.3827908 | 0.83285 | 1.02495 |
| 150 | 1.2  | 1.2  | -184.3936528 | -184.3946548 | 0.7294  | 0.70213 |
| 150 | 1.2  | 1.25 | -184.3909835 | -184.4000507 | 0.80203 | 0.55531 |
| 150 | 1.2  | 1.3  | -184.3840945 | -184.4011177 | 0.98948 | 0.52628 |
| 150 | 1.2  | 1.35 | -184.3746392 | -184.399454  | 1.24676 | 0.57155 |
| 150 | 1.2  | 1.4  | -184.3638162 | -184.3962521 | 1.54125 | 0.65867 |
| 150 | 1.2  | 1.45 | -184.352476  | -184.3924079 | 1.84982 | 0.76327 |
| 150 | 1.2  | 1.5  | -184.3411991 | -184.3885892 | 2.15666 | 0.86718 |
| 150 | 1.2  | 1.6  | -            | -184.382862  | -       | 1.02302 |
| 150 | 1.2  | 1.7  | -            | -184.3811104 | -       | 1.07067 |
| 150 | 1.2  | 1.8  | -            | -184.3824804 | -       | 1.0334  |
| 150 | 1.2  | 1.9  | -            | -184.3866514 | -       | 0.9199  |
| 150 | 1.2  | 2    | -            | -184.3891852 | -       | 0.85096 |
| 150 | 1.2  | 2.1  | -            | -184.3911972 | -       | 0.79621 |
| 150 | 1.2  | 2.2  | -            | -184.3925999 | -       | 0.75805 |
| 150 | 1.2  | 2.3  | -            | -184.3934642 | -       | 0.73453 |
| 150 | 1.2  | 2.4  | -            | -184.3922121 | -       | 0.7686  |
| 150 | 1.2  | 2.5  | -            | -184.3940516 | -       | 0.71855 |
| 150 | 1.2  | 2.6  | -            | -184.3939921 | -       | 0.72016 |
| 150 | 1.2  | 2.7  | -            | -184.3920903 | -       | 0.77191 |

|     |      |      |              |              |         |         |
|-----|------|------|--------------|--------------|---------|---------|
| 150 | 1.2  | 2.8  | -            | -184.3935473 | -       | 0.73227 |
| 150 | 1.2  | 2.9  | -            | -184.3915241 | -       | 0.78732 |
| 150 | 1.2  | 3    | -            | -184.3929425 | -       | 0.74873 |
| 150 | 1.25 | 1    | -184.2960417 | -184.2727252 | 3.38539 | 4.01984 |
| 150 | 1.25 | 1.05 | -184.3410338 | -184.3250043 | 2.16116 | 2.59732 |
| 150 | 1.25 | 1.1  | -184.367057  | -184.358913  | 1.45307 | 1.67467 |
| 150 | 1.25 | 1.15 | -184.3795756 | -184.3795374 | 1.11244 | 1.11348 |
| 150 | 1.25 | 1.2  | -184.3826458 | -184.3907769 | 1.0289  | 0.80765 |
| 150 | 1.25 | 1.25 | -184.3792768 | -184.395523  | 1.12057 | 0.67851 |
| 150 | 1.25 | 1.3  | -184.3716927 | -184.3959104 | 1.32693 | 0.66797 |
| 150 | 1.25 | 1.35 | -184.36153   | -184.3935168 | 1.60346 | 0.7331  |
| 150 | 1.25 | 1.4  | -184.3499824 | -184.3895058 | 1.91767 | 0.84224 |
| 150 | 1.25 | 1.45 | -184.3379031 | -184.3847417 | 2.24635 | 0.97187 |
| 150 | 1.25 | 1.5  | -184.325884  | -184.3798681 | 2.57339 | 1.10448 |
| 150 | 1.3  | 1    | -184.2844239 | -184.2666827 | 3.70152 | 4.18425 |
| 150 | 1.3  | 1.05 | -184.3284349 | -184.318501  | 2.50397 | 2.77428 |
| 150 | 1.3  | 1.1  | -184.3536354 | -184.3517781 | 1.81827 | 1.86881 |
| 150 | 1.3  | 1.15 | -184.3654455 | -184.3717966 | 1.49692 | 1.3241  |
| 150 | 1.3  | 1.2  | -184.3678806 | -184.3824535 | 1.43066 | 1.03413 |
| 150 | 1.3  | 1.25 | -184.3639091 | -184.3866024 | 1.53872 | 0.92124 |
| 150 | 1.3  | 1.3  | -184.3557196 | -184.3863633 | 1.76156 | 0.92774 |
| 150 | 1.3  | 1.35 | -184.3449307 | -184.3833008 | 2.05512 | 1.01107 |
| 150 | 1.3  | 1.4  | -184.3327226 | -184.3785592 | 2.38731 | 1.14009 |
| 150 | 1.3  | 1.45 | -184.3199571 | -184.3729743 | 2.73466 | 1.29206 |
| 150 | 1.3  | 1.5  | -184.3072371 | -184.3671628 | 3.08077 | 1.45019 |
| 150 | 1.35 | 1    | -184.2704187 | -184.2583178 | 4.0826  | 4.41186 |
| 150 | 1.35 | 1.05 | -184.3135145 | -184.3094748 | 2.90996 | 3.01988 |
| 150 | 1.35 | 1.1  | -184.3379825 | -184.3420388 | 2.24419 | 2.13381 |
| 150 | 1.35 | 1.15 | -184.3492054 | -184.3614549 | 1.93881 | 1.6055  |
| 150 | 1.35 | 1.2  | -184.3511441 | -184.3715275 | 1.88606 | 1.33143 |
| 150 | 1.35 | 1.25 | -184.3467145 | -184.3750767 | 2.00659 | 1.23485 |
| 150 | 1.35 | 1.3  | -184.3380578 | -184.3742205 | 2.24214 | 1.25815 |
| 150 | 1.35 | 1.35 | -184.3267484 | -184.3705184 | 2.54987 | 1.35888 |
| 150 | 1.35 | 1.4  | -184.3139494 | -184.3650975 | 2.89813 | 1.50639 |
| 150 | 1.35 | 1.45 | -184.300526  | -184.3587665 | 3.26338 | 1.67865 |
| 150 | 1.35 | 1.5  | -184.2871077 | -184.3521142 | 3.62849 | 1.85966 |
| 150 | 1.4  | 1    | -184.2552419 | -184.2488321 | 4.49556 | 4.66997 |
| 150 | 1.4  | 1.05 | -184.2974841 | -184.2991595 | 3.34615 | 3.30056 |
| 150 | 1.4  | 1.1  | -184.3213245 | -184.3309543 | 2.69745 | 2.43542 |
| 150 | 1.4  | 1.15 | -184.3321112 | -184.3498133 | 2.40394 | 1.92227 |
| 150 | 1.4  | 1.2  | -184.3337483 | -184.3592751 | 2.3594  | 1.66481 |
| 150 | 1.4  | 1.25 | -184.3290822 | -184.3622052 | 2.48636 | 1.58509 |
| 150 | 1.4  | 1.3  | -184.3201975 | -184.3607305 | 2.72812 | 1.62521 |
| 150 | 1.4  | 1.35 | -184.3086216 | -184.3564038 | 3.0431  | 1.74294 |
| 150 | 1.4  | 1.4  | -184.2954727 | -184.350337  | 3.40088 | 1.90802 |
| 150 | 1.4  | 1.45 | -184.2815725 | -184.3433108 | 3.7791  | 2.0992  |
| 150 | 1.4  | 1.5  | -184.2675343 | -184.335884  | 4.16108 | 2.30129 |
| 150 | 1.45 | 1    | -184.2397252 | -184.2391098 | 4.91777 | 4.93451 |
| 150 | 1.45 | 1.05 | -184.2811584 | -184.2880791 | 3.79037 | 3.60206 |
| 150 | 1.45 | 1.1  | -184.3044526 | -184.3196288 | 3.15653 | 2.74359 |
| 150 | 1.45 | 1.15 | -184.3149288 | -184.3379086 | 2.87148 | 2.2462  |
| 150 | 1.45 | 1.2  | -184.3164256 | -184.3466646 | 2.83075 | 2.00794 |
| 150 | 1.45 | 1.25 | -184.3117215 | -184.3488923 | 2.95875 | 1.94733 |
| 150 | 1.45 | 1.3  | -184.3028479 | -184.3467751 | 3.2002  | 2.00494 |
| 150 | 1.45 | 1.35 | -184.2913052 | -184.3418286 | 3.51427 | 2.13953 |
| 150 | 1.45 | 1.4  | -184.2781967 | -184.3351329 | 3.87096 | 2.32172 |
| 150 | 1.45 | 1.45 | -184.2643176 | -184.3274386 | 4.24861 | 2.53109 |
| 150 | 1.45 | 1.5  | -184.2502168 | -184.3192742 | 4.63229 | 2.75324 |
| 150 | 1.5  | 1    | -184.2244156 | -184.3717966 | 5.33434 | 1.3241  |
| 150 | 1.5  | 1.05 | -184.2650467 | -184.395523  | 4.22877 | 0.67851 |
| 150 | 1.5  | 1.1  | -184.2878142 | -184.399454  | 3.60927 | 0.57155 |
| 150 | 1.5  | 1.15 | -184.2980215 | -184.3262226 | 3.33152 | 2.56417 |
| 150 | 1.5  | 1.25 | -184.2948043 | -184.3357357 | 3.41906 | 2.30532 |
| 150 | 1.5  | 1.3  | -184.2860805 | -184.332887  | 3.65644 | 2.38284 |
| 150 | 1.5  | 1.35 | -184.274758  | -184.3273267 | 3.96453 | 2.53413 |
| 150 | 1.5  | 1.4  | -184.2619582 | -184.3200174 | 4.31281 | 2.73302 |
| 150 | 1.5  | 1.5  | -184.2349181 | -184.3027928 | 5.04857 | 3.2017  |
| 151 | 1    | 1    | -184.2354096 | -184.1884383 | 5.03519 | 6.31328 |
| 151 | 1    | 1.05 | -184.2863236 | -184.2416477 | 3.64982 | 4.86546 |
| 151 | 1    | 1.1  | -184.3175777 | -184.2760611 | 2.7994  | 3.92907 |
| 151 | 1    | 1.15 | -184.3348459 | -184.297354  | 2.32953 | 3.34969 |
| 151 | 1    | 1.2  | -184.3423615 | -184.309665  | 2.12503 | 3.0147  |
| 151 | 1    | 1.25 | -184.3432715 | -184.3160779 | 2.10027 | 2.84021 |

|     |      |      |              |              |         |         |
|-----|------|------|--------------|--------------|---------|---------|
| 151 | 1    | 1.3  | -184.3398918 | -184.3189726 | 2.19223 | 2.76145 |
| 151 | 1    | 1.35 | -184.3338946 | -184.3200353 | 2.35542 | 2.73253 |
| 151 | 1    | 1.4  | -184.3264557 | -184.3204955 | 2.55783 | 2.72001 |
| 151 | 1    | 1.45 | -184.3183732 | -184.3212343 | 2.77775 | 2.6999  |
| 151 | 1.05 | 1    | -184.2767563 | -184.2333591 | 3.91015 | 5.09099 |
| 151 | 1.05 | 1.05 | -184.3262183 | -184.2859602 | 2.56429 | 3.65971 |
| 151 | 1.05 | 1.1  | -184.3561624 | -184.3200419 | 1.74951 | 2.73235 |
| 151 | 1.05 | 1.15 | -184.3722267 | -184.3410101 | 1.3124  | 2.1618  |
| 151 | 1.05 | 1.2  | -184.3786061 | -184.3531324 | 1.13882 | 1.83196 |
| 151 | 1.05 | 1.25 | -184.3784289 | -184.3594048 | 1.14364 | 1.66129 |
| 151 | 1.05 | 1.3  | -184.3740022 | -184.3619722 | 1.26409 | 1.59143 |
| 151 | 1.05 | 1.35 | -184.3670033 | -184.3624385 | 1.45453 | 1.57874 |
| 151 | 1.05 | 1.4  | -184.358618  | -184.3620121 | 1.68269 | 1.59034 |
| 151 | 1.05 | 1.45 | -184.3496608 | -184.3615909 | 1.92642 | 1.6018  |
| 151 | 1.1  | 1    | -184.2987048 | -184.2593362 | 3.31293 | 4.38415 |
| 151 | 1.1  | 1.05 | -184.3468587 | -184.3115406 | 2.00266 | 2.96367 |
| 151 | 1.1  | 1.1  | -184.3756337 | -184.3452763 | 1.2197  | 2.04572 |
| 151 | 1.1  | 1.15 | -184.3906205 | -184.3662711 | 0.81191 | 1.47445 |
| 151 | 1.1  | 1.2  | -184.3959842 | -184.3783388 | 0.66596 | 1.14475 |
| 151 | 1.1  | 1.25 | -184.3948273 | -184.384451  | 0.69744 | 0.97978 |
| 151 | 1.1  | 1.3  | -184.3894433 | -184.3865743 | 0.84394 | 0.922   |
| 151 | 1.1  | 1.35 | -184.3815067 | -184.386352  | 1.05989 | 0.92805 |
| 151 | 1.1  | 1.4  | -184.3722135 | -184.3849914 | 1.31276 | 0.96507 |
| 151 | 1.1  | 1.45 | -184.3623921 | -184.3834008 | 1.58    | 1.00835 |
| 151 | 1.15 | 1    | -184.30689   | -184.2719533 | 3.09021 | 4.04084 |
| 151 | 1.15 | 1.05 | -184.3538536 | -184.3237351 | 1.81233 | 2.63186 |
| 151 | 1.15 | 1.1  | -184.3815731 | -184.3576027 | 1.05809 | 1.71032 |
| 151 | 1.15 | 1.15 | -184.3955973 | -184.3786547 | 0.67649 | 1.1375  |
| 151 | 1.15 | 1.2  | -184.4000568 | -184.3906433 | 0.55514 | 0.81129 |
| 151 | 1.15 | 1.25 | -184.3980266 | -184.3963792 | 0.61038 | 0.65521 |
| 151 | 1.15 | 1.3  | -184.3917801 | -184.3979782 | 0.78035 | 0.6117  |
| 151 | 1.15 | 1.35 | -184.3829847 | -184.3970368 | 1.01968 | 0.63732 |
| 151 | 1.15 | 1.4  | -184.3728404 | -184.3947584 | 1.2957  | 0.69931 |
| 151 | 1.15 | 1.45 | -184.3621871 | -184.3920461 | 1.58558 | 0.77312 |
| 151 | 1.2  | 1    | -184.3055249 | -184.2751426 | 3.12736 | 3.95406 |
| 151 | 1.2  | 1.05 | -184.3513908 | -184.3270647 | 1.87935 | 2.54126 |
| 151 | 1.2  | 1.1  | -184.3781491 | -184.3609974 | 1.15125 | 1.61795 |
| 151 | 1.2  | 1.15 | -184.3913087 | -184.3819453 | 0.79318 | 1.04796 |
| 151 | 1.2  | 1.2  | -184.3949645 | -184.3936565 | 0.69371 | 0.7293  |
| 151 | 1.2  | 1.25 | -184.3921594 | -184.398951  | 0.77003 | 0.58523 |
| 151 | 1.2  | 1.3  | -184.3851451 | -184.3999504 | 0.96089 | 0.55804 |
| 151 | 1.2  | 1.35 | -184.3755749 | -184.3982428 | 1.2213  | 0.6045  |
| 151 | 1.2  | 1.4  | -184.3646474 | -184.3950214 | 1.51863 | 0.69216 |
| 151 | 1.2  | 1.45 | -184.353211  | -184.3911857 | 1.82982 | 0.79653 |
| 151 | 1.25 | 1    | -184.2977573 | -184.272486  | 3.33871 | 4.02634 |
| 151 | 1.25 | 1.05 | -184.3425956 | -184.324418  | 2.11866 | 2.61328 |
| 151 | 1.25 | 1.1  | -184.368472  | -184.3580958 | 1.41457 | 1.6969  |
| 151 | 1.25 | 1.15 | -184.3808515 | -184.3789726 | 1.07772 | 1.12884 |
| 151 | 1.25 | 1.2  | -184.383793  | -184.3903725 | 0.99768 | 0.81865 |
| 151 | 1.25 | 1.25 | -184.3803043 | -184.3952269 | 1.09261 | 0.68657 |
| 151 | 1.25 | 1.3  | -184.3726104 | -184.3956888 | 1.30196 | 0.674   |
| 151 | 1.25 | 1.35 | -184.3623477 | -184.3922738 | 1.58121 | 0.76692 |
| 151 | 1.25 | 1.4  | -184.3507091 | -184.3882582 | 1.89789 | 0.87618 |
| 151 | 1.25 | 1.45 | -184.3385476 | -184.3835105 | 2.22881 | 1.00537 |
| 151 | 1.3  | 1    | -184.2859137 | -184.2661229 | 3.66098 | 4.19949 |
| 151 | 1.3  | 1.05 | -184.329789  | -184.3176896 | 2.46713 | 2.79636 |
| 151 | 1.3  | 1.1  | -184.3548575 | -184.3507875 | 1.78502 | 1.89576 |
| 151 | 1.3  | 1.15 | -184.3665419 | -184.3719021 | 1.46708 | 1.32123 |
| 151 | 1.3  | 1.2  | -184.3688592 | -184.3828257 | 1.40403 | 1.024   |
| 151 | 1.3  | 1.25 | -184.3647794 | -184.3871589 | 1.51504 | 0.9061  |
| 151 | 1.3  | 1.3  | -184.3564937 | -184.3870417 | 1.7405  | 0.90929 |
| 151 | 1.3  | 1.35 | -184.345616  | -184.3820453 | 2.03648 | 1.04524 |
| 151 | 1.3  | 1.4  | -184.3333309 | -184.3773069 | 2.37075 | 1.17417 |
| 151 | 1.3  | 1.45 | -184.3204974 | -184.3717416 | 2.71996 | 1.3256  |
| 151 | 1.35 | 1    | -184.2717001 | -184.2575189 | 4.04773 | 4.4336  |
| 151 | 1.35 | 1.05 | -184.3146725 | -184.3084689 | 2.87845 | 3.04725 |
| 151 | 1.35 | 1.1  | -184.3390169 | -184.3409168 | 2.21604 | 2.16434 |
| 151 | 1.35 | 1.15 | -184.350117  | -184.3621988 | 1.91401 | 1.58526 |
| 151 | 1.35 | 1.2  | -184.351942  | -184.3725973 | 1.86435 | 1.30232 |
| 151 | 1.35 | 1.25 | -184.347407  | -184.3763896 | 1.98775 | 1.19913 |
| 151 | 1.35 | 1.3  | -184.3386564 | -184.3757058 | 2.22585 | 1.21774 |
| 151 | 1.35 | 1.35 | -184.3272652 | -184.369254  | 2.5358  | 1.39329 |
| 151 | 1.35 | 1.4  | -184.3143975 | -184.3638418 | 2.88593 | 1.54055 |

|     |      |      |              |              |         |         |
|-----|------|------|--------------|--------------|---------|---------|
| 151 | 1.35 | 1.45 | -184.30092   | -184.3575326 | 3.25266 | 1.71223 |
| 151 | 1.4  | 1    | -184.2563341 | -184.2478493 | 4.46584 | 4.69671 |
| 151 | 1.4  | 1.05 | -184.2984617 | -184.2979079 | 3.31955 | 3.33461 |
| 151 | 1.4  | 1.1  | -184.3221794 | -184.3297695 | 2.67419 | 2.46766 |
| 151 | 1.4  | 1.15 | -184.3328435 | -184.3510282 | 2.38402 | 1.88921 |
| 151 | 1.4  | 1.2  | -184.3343661 | -184.3608502 | 2.34259 | 1.62195 |
| 151 | 1.4  | 1.25 | -184.3295964 | -184.3640979 | 2.47237 | 1.53359 |
| 151 | 1.4  | 1.3  | -184.3206181 | -184.3628779 | 2.71667 | 1.56678 |
| 151 | 1.4  | 1.35 | -184.3089582 | -184.3551302 | 3.03394 | 1.7776  |
| 151 | 1.4  | 1.4  | -184.295733  | -184.3490752 | 3.39379 | 1.94235 |
| 151 | 1.4  | 1.45 | -184.2817681 | -184.342072  | 3.77378 | 2.13291 |
| 151 | 1.45 | 1    | -184.2406494 | -184.2379955 | 4.89262 | 4.96483 |
| 151 | 1.45 | 1.05 | -184.2819734 | -184.2868695 | 3.76819 | 3.63497 |
| 151 | 1.45 | 1.1  | -184.3051458 | -184.3183966 | 3.13767 | 2.77712 |
| 151 | 1.45 | 1.15 | -184.3155027 | -184.3392722 | 2.85586 | 2.20909 |
| 151 | 1.45 | 1.2  | -184.3168921 | -184.3484779 | 2.81806 | 1.95861 |
| 151 | 1.45 | 1.25 | -184.3120936 | -184.351178  | 2.94862 | 1.88513 |
| 151 | 1.45 | 1.3  | -184.3031354 | -184.3494577 | 3.19238 | 1.93195 |
| 151 | 1.45 | 1.35 | -184.2915144 | -184.340542  | 3.50858 | 2.17454 |
| 151 | 1.45 | 1.4  | -184.2783298 | -184.3338588 | 3.86734 | 2.35639 |
| 151 | 1.45 | 1.45 | -184.2643762 | -184.3261878 | 4.24701 | 2.56512 |
| 152 | 1    | 1    | -184.2383357 | -184.1906243 | 4.95558 | 6.2538  |
| 152 | 1    | 1.05 | -184.2889687 | -184.2433106 | 3.57785 | 4.82021 |
| 152 | 1    | 1.1  | -184.3199587 | -184.2771873 | 2.73461 | 3.89842 |
| 152 | 1    | 1.15 | -184.3369795 | -184.2979581 | 2.27148 | 3.33325 |
| 152 | 1    | 1.2  | -184.3442643 | -184.3098296 | 2.07326 | 3.01023 |
| 152 | 1    | 1.25 | -184.3449603 | -184.3158437 | 2.05432 | 2.84658 |
| 152 | 1    | 1.3  | -184.3413831 | -184.3183949 | 2.15166 | 2.77716 |
| 152 | 1    | 1.35 | -184.3352052 | -184.3192074 | 2.31976 | 2.75506 |
| 152 | 1    | 1.4  | -184.3276023 | -184.3195129 | 2.52663 | 2.74674 |
| 152 | 1    | 1.45 | -184.3193727 | -184.3201897 | 2.75056 | 2.72833 |
| 152 | 1.05 | 1    | -184.2794061 | -184.2350438 | 3.83805 | 5.04515 |
| 152 | 1.05 | 1.05 | -184.3286187 | -184.2870909 | 2.49898 | 3.62895 |
| 152 | 1.05 | 1.1  | -184.3583301 | -184.3206648 | 1.69053 | 2.7154  |
| 152 | 1.05 | 1.15 | -184.3741725 | -184.3411735 | 1.25946 | 2.15736 |
| 152 | 1.05 | 1.2  | -184.3803469 | -184.3528511 | 1.09145 | 1.83961 |
| 152 | 1.05 | 1.25 | -184.3799793 | -184.3587775 | 1.10145 | 1.67835 |
| 152 | 1.05 | 1.3  | -184.3753767 | -184.361093  | 1.22669 | 1.61535 |
| 152 | 1.05 | 1.35 | -184.3682163 | -184.3613904 | 1.42152 | 1.60726 |
| 152 | 1.05 | 1.4  | -184.3596839 | -184.3608706 | 1.65369 | 1.6214  |
| 152 | 1.05 | 1.45 | -184.3505936 | -184.3604277 | 1.90104 | 1.63345 |
| 152 | 1.1  | 1    | -184.3010849 | -184.2604913 | 3.24817 | 4.35272 |
| 152 | 1.1  | 1.05 | -184.3490195 | -184.3122036 | 1.94387 | 2.94563 |
| 152 | 1.1  | 1.1  | -184.3775867 | -184.3454246 | 1.16656 | 2.04168 |
| 152 | 1.1  | 1.15 | -184.3923791 | -184.3659592 | 0.76405 | 1.48294 |
| 152 | 1.1  | 1.2  | -184.3975617 | -184.3777313 | 0.62303 | 1.16262 |
| 152 | 1.1  | 1.25 | -184.3962367 | -184.3835449 | 0.65909 | 1.00443 |
| 152 | 1.1  | 1.3  | -184.3906972 | -184.3854954 | 0.80982 | 0.95136 |
| 152 | 1.1  | 1.35 | -184.3826177 | -184.3851636 | 1.02966 | 0.96039 |
| 152 | 1.1  | 1.4  | -184.3731937 | -184.3837494 | 1.28609 | 0.99887 |
| 152 | 1.1  | 1.45 | -184.3632536 | -184.3821595 | 1.55656 | 1.04213 |
| 152 | 1.15 | 1    | -184.3090111 | -184.2726602 | 3.0325  | 4.0216  |
| 152 | 1.15 | 1.05 | -184.3557814 | -184.3238955 | 1.75988 | 2.62749 |
| 152 | 1.15 | 1.1  | -184.3833189 | -184.3572836 | 1.01058 | 1.719   |
| 152 | 1.15 | 1.15 | -184.3971719 | -184.3779875 | 0.63364 | 1.15565 |
| 152 | 1.15 | 1.2  | -184.4014724 | -184.3897287 | 0.51663 | 0.83617 |
| 152 | 1.15 | 1.25 | -184.399294  | -184.3952932 | 0.5759  | 0.68476 |
| 152 | 1.15 | 1.3  | -184.3929109 | -184.3967783 | 0.74958 | 0.64435 |
| 152 | 1.15 | 1.35 | -184.3839899 | -184.3957688 | 0.99233 | 0.67182 |
| 152 | 1.15 | 1.4  | -184.3737305 | -184.3934634 | 1.27148 | 0.73455 |
| 152 | 1.15 | 1.45 | -184.3629725 | -184.3907648 | 1.56421 | 0.80798 |
| 152 | 1.2  | 1    | -184.3073991 | -184.2753551 | 3.07636 | 3.94828 |
| 152 | 1.2  | 1.05 | -184.353096  | -184.3267621 | 1.83295 | 2.54949 |
| 152 | 1.2  | 1.1  | -184.3796945 | -184.3603374 | 1.1092  | 1.63591 |
| 152 | 1.2  | 1.15 | -184.392704  | -184.3810429 | 0.75521 | 1.07251 |
| 152 | 1.2  | 1.2  | -184.3962199 | -184.3925957 | 0.65955 | 0.75816 |
| 152 | 1.2  | 1.25 | -184.393285  | -184.3977919 | 0.73941 | 0.61677 |
| 152 | 1.2  | 1.3  | -184.386151  | -184.3987304 | 0.93352 | 0.59124 |
| 152 | 1.2  | 1.35 | -184.3764708 | -184.3969783 | 1.19692 | 0.63891 |
| 152 | 1.2  | 1.4  | -184.365443  | -184.3937355 | 1.49699 | 0.72715 |
| 152 | 1.2  | 1.45 | -184.3539153 | -184.3899096 | 1.81065 | 0.83125 |
| 152 | 1.25 | 1    | -184.2993985 | -184.2722277 | 3.29406 | 4.03337 |
| 152 | 1.25 | 1.05 | -184.3440895 | -184.3237889 | 2.07802 | 2.63039 |

|     |      |      |              |              |         |         |
|-----|------|------|--------------|--------------|---------|---------|
| 152 | 1.25 | 1.1  | -184.3698254 | -184.3572285 | 1.37774 | 1.7205  |
| 152 | 1.25 | 1.15 | -184.3820726 | -184.3779168 | 1.04449 | 1.15757 |
| 152 | 1.25 | 1.2  | -184.3848905 | -184.3891879 | 0.96782 | 0.85089 |
| 152 | 1.25 | 1.25 | -184.3812875 | -184.3939655 | 1.06586 | 0.72089 |
| 152 | 1.25 | 1.3  | -184.3734886 | -184.3943811 | 1.27806 | 0.70958 |
| 152 | 1.25 | 1.35 | -184.3631303 | -184.3920332 | 1.55991 | 0.77347 |
| 152 | 1.25 | 1.4  | -184.351405  | -184.3869583 | 1.87896 | 0.91155 |
| 152 | 1.25 | 1.45 | -184.3391648 | -184.3822283 | 2.21202 | 1.04026 |
| 152 | 1.3  | 1    | -184.2873376 | -184.2655267 | 3.62223 | 4.21571 |
| 152 | 1.3  | 1.05 | -184.3310832 | -184.3168305 | 2.43192 | 2.81973 |
| 152 | 1.3  | 1.1  | -184.3560263 | -184.3497428 | 1.75321 | 1.92419 |
| 152 | 1.3  | 1.15 | -184.3675909 | -184.3707251 | 1.43854 | 1.35326 |
| 152 | 1.3  | 1.2  | -184.3697959 | -184.3815761 | 1.37854 | 1.058   |
| 152 | 1.3  | 1.25 | -184.3656128 | -184.3858643 | 1.49237 | 0.94132 |
| 152 | 1.3  | 1.3  | -184.3572337 | -184.3857219 | 1.72036 | 0.9452  |
| 152 | 1.3  | 1.35 | -184.3462726 | -184.3827406 | 2.01861 | 1.02632 |
| 152 | 1.3  | 1.4  | -184.333914  | -184.3760066 | 2.35489 | 1.20955 |
| 152 | 1.3  | 1.45 | -184.3210153 | -184.3704604 | 2.70586 | 1.36046 |
| 152 | 1.35 | 1    | -184.2729242 | -184.2566753 | 4.01442 | 4.45655 |
| 152 | 1.35 | 1.05 | -184.31578   | -184.3074096 | 2.84832 | 3.07607 |
| 152 | 1.35 | 1.1  | -184.3400068 | -184.3397446 | 2.18911 | 2.19624 |
| 152 | 1.35 | 1.15 | -184.3509908 | -184.3609664 | 1.89023 | 1.61879 |
| 152 | 1.35 | 1.2  | -184.3527056 | -184.3713233 | 1.84357 | 1.33698 |
| 152 | 1.35 | 1.25 | -184.34807   | -184.3750889 | 1.9697  | 1.23452 |
| 152 | 1.35 | 1.3  | -184.3392297 | -184.3743906 | 2.21025 | 1.25352 |
| 152 | 1.35 | 1.35 | -184.3277609 | -184.3708112 | 2.52232 | 1.35092 |
| 152 | 1.35 | 1.4  | -184.3148284 | -184.3625437 | 2.87421 | 1.57587 |
| 152 | 1.35 | 1.45 | -184.3012995 | -184.3562576 | 3.24233 | 1.74692 |
| 152 | 1.4  | 1    | -184.2573767 | -184.2468121 | 4.43747 | 4.72493 |
| 152 | 1.4  | 1.05 | -184.2993958 | -184.29667   | 3.29413 | 3.3683  |
| 152 | 1.4  | 1.1  | -184.3229966 | -184.3285358 | 2.65195 | 2.50123 |
| 152 | 1.4  | 1.15 | -184.333543  | -184.349776  | 2.36499 | 1.92328 |
| 152 | 1.4  | 1.2  | -184.3349546 | -184.3595727 | 2.32658 | 1.65672 |
| 152 | 1.4  | 1.25 | -184.3300841 | -184.3628002 | 2.4591  | 1.5689  |
| 152 | 1.4  | 1.3  | -184.3210159 | -184.3615701 | 2.70585 | 1.60237 |
| 152 | 1.4  | 1.35 | -184.3092739 | -184.3574392 | 3.02535 | 1.71477 |
| 152 | 1.4  | 1.4  | -184.2959766 | -184.3477764 | 3.38717 | 1.97769 |
| 152 | 1.4  | 1.45 | -184.2819513 | -184.3407971 | 3.7688  | 2.1676  |
| 152 | 1.45 | 1    | -184.2415313 | -184.236808  | 4.86862 | 4.99714 |
| 152 | 1.45 | 1.05 | -184.2827509 | -184.285612  | 3.74704 | 3.66919 |
| 152 | 1.45 | 1.1  | -184.3058075 | -184.3171128 | 3.11967 | 2.81205 |
| 152 | 1.45 | 1.15 | -184.3160474 | -184.338014  | 2.84104 | 2.24333 |
| 152 | 1.45 | 1.2  | -184.3173313 | -184.3472029 | 2.80611 | 1.9933  |
| 152 | 1.45 | 1.25 | -184.3124399 | -184.3498883 | 2.9392  | 1.92023 |
| 152 | 1.45 | 1.3  | -184.3033996 | -184.3481607 | 3.18519 | 1.96724 |
| 152 | 1.45 | 1.35 | -184.2917014 | -184.3435352 | 3.50349 | 2.0931  |
| 152 | 1.45 | 1.4  | -184.2784437 | -184.3325526 | 3.86424 | 2.39193 |
| 152 | 1.45 | 1.45 | -184.2644191 | -184.3249049 | 4.24585 | 2.60003 |
| 153 | 1    | 1    | -184.2411401 | -184.1927553 | 4.87927 | 6.19582 |
| 153 | 1    | 1.05 | -184.291505  | -184.2449448 | 3.50884 | 4.77574 |
| 153 | 1    | 1.1  | -184.3222418 | -184.2783056 | 2.67249 | 3.868   |
| 153 | 1    | 1.15 | -184.3390255 | -184.2985594 | 2.21581 | 3.31689 |
| 153 | 1    | 1.2  | -184.3460894 | -184.3099732 | 2.0236  | 3.00632 |
| 153 | 1    | 1.25 | -184.3465803 | -184.3156032 | 2.01024 | 2.85313 |
| 153 | 1    | 1.3  | -184.3428141 | -184.3178013 | 2.11272 | 2.79332 |
| 153 | 1    | 1.35 | -184.3364633 | -184.3183503 | 2.28552 | 2.77838 |
| 153 | 1    | 1.4  | -184.3287036 | -184.3184922 | 2.49667 | 2.77452 |
| 153 | 1    | 1.45 | -184.320333  | -184.3191042 | 2.72443 | 2.75787 |
| 153 | 1.05 | 1    | -184.2819455 | -184.236699  | 3.76895 | 5.00011 |
| 153 | 1.05 | 1.05 | -184.3309189 | -184.2882128 | 2.43639 | 3.59842 |
| 153 | 1.05 | 1.1  | -184.3604053 | -184.3212676 | 1.63406 | 2.699   |
| 153 | 1.05 | 1.15 | -184.3760371 | -184.341339  | 1.20872 | 2.15286 |
| 153 | 1.05 | 1.2  | -184.3820152 | -184.3525623 | 1.04606 | 1.84747 |
| 153 | 1.05 | 1.25 | -184.3814654 | -184.3581256 | 1.06102 | 1.69609 |
| 153 | 1.05 | 1.3  | -184.3766946 | -184.360177  | 1.19083 | 1.64027 |
| 153 | 1.05 | 1.35 | -184.3693797 | -184.3602967 | 1.38987 | 1.63702 |
| 153 | 1.05 | 1.4  | -184.3607066 | -184.3596793 | 1.62586 | 1.65382 |
| 153 | 1.05 | 1.45 | -184.3514891 | -184.3592154 | 1.87667 | 1.66644 |
| 153 | 1.1  | 1    | -184.303365  | -184.2616385 | 3.18613 | 4.32151 |
| 153 | 1.1  | 1.05 | -184.3510878 | -184.3128371 | 1.88759 | 2.92839 |
| 153 | 1.1  | 1.1  | -184.3794575 | -184.3455807 | 1.11565 | 2.03744 |
| 153 | 1.1  | 1.15 | -184.3940632 | -184.3656331 | 0.71823 | 1.49181 |
| 153 | 1.1  | 1.2  | -184.3990724 | -184.3770431 | 0.58193 | 1.18135 |



|     |      |      |              |              |         |         |
|-----|------|------|--------------|--------------|---------|---------|
| 153 | 1.1  | 1.25 | -184.3975865 | -184.3825955 | 0.62236 | 1.03027 |
| 153 | 1.1  | 1.3  | -184.3918985 | -184.3843657 | 0.77713 | 0.9821  |
| 153 | 1.1  | 1.35 | -184.3836823 | -184.3839202 | 1.00069 | 0.99422 |
| 153 | 1.1  | 1.4  | -184.3741334 | -184.3824513 | 1.26052 | 1.03419 |
| 153 | 1.1  | 1.45 | -184.3640799 | -184.3808642 | 1.53407 | 1.07737 |
| 153 | 1.15 | 1    | -184.3110413 | -184.273324  | 2.97726 | 4.00354 |
| 153 | 1.15 | 1.05 | -184.3576263 | -184.3240667 | 1.70968 | 2.62284 |
| 153 | 1.15 | 1.1  | -184.3849891 | -184.3569476 | 0.96514 | 1.72815 |
| 153 | 1.15 | 1.15 | -184.3986785 | -184.3772848 | 0.59265 | 1.17477 |
| 153 | 1.15 | 1.2  | -184.4028266 | -184.3887669 | 0.47978 | 0.86234 |
| 153 | 1.15 | 1.25 | -184.4005068 | -184.3941533 | 0.5429  | 0.71578 |
| 153 | 1.15 | 1.3  | -184.3939935 | -184.395521  | 0.72013 | 0.67856 |
| 153 | 1.15 | 1.35 | -184.3849522 | -184.3944422 | 0.96614 | 0.70792 |
| 153 | 1.15 | 1.4  | -184.374583  | -184.3921102 | 1.24829 | 0.77137 |
| 153 | 1.15 | 1.45 | -184.3637251 | -184.3894276 | 1.54373 | 0.84436 |
| 153 | 1.2  | 1    | -184.3091926 | -184.2755887 | 3.02756 | 3.94192 |
| 153 | 1.2  | 1.05 | -184.3547266 | -184.3264433 | 1.78858 | 2.55817 |
| 153 | 1.2  | 1.1  | -184.3811722 | -184.359639  | 1.06899 | 1.65491 |
| 153 | 1.2  | 1.15 | -184.3940382 | -184.3800869 | 0.71891 | 1.09853 |
| 153 | 1.2  | 1.2  | -184.3974202 | -184.3914711 | 0.62688 | 0.78876 |
| 153 | 1.2  | 1.25 | -184.3943613 | -184.3965635 | 0.71012 | 0.6502  |
| 153 | 1.2  | 1.3  | -184.3871124 | -184.3974488 | 0.90736 | 0.62611 |
| 153 | 1.2  | 1.35 | -184.3773281 | -184.3956745 | 1.17359 | 0.67439 |
| 153 | 1.2  | 1.4  | -184.3662044 | -184.392397  | 1.47627 | 0.76357 |
| 153 | 1.2  | 1.45 | -184.3545896 | -184.3885809 | 1.79231 | 0.8674  |
| 153 | 1.25 | 1    | -184.300967  | -184.2719591 | 3.25138 | 4.04068 |
| 153 | 1.25 | 1.05 | -184.345517  | -184.3231213 | 2.03917 | 2.64856 |
| 153 | 1.25 | 1.1  | -184.3711188 | -184.356353  | 1.34255 | 1.74432 |
| 153 | 1.25 | 1.15 | -184.3832396 | -184.3767966 | 1.01274 | 1.18805 |
| 153 | 1.25 | 1.2  | -184.3859389 | -184.3879433 | 0.93929 | 0.88475 |
| 153 | 1.25 | 1.25 | -184.3822273 | -184.3926457 | 1.04028 | 0.7568  |
| 153 | 1.25 | 1.3  | -184.3743285 | -184.3930169 | 1.25521 | 0.7467  |
| 153 | 1.25 | 1.35 | -184.3638786 | -184.3906482 | 1.53955 | 0.81115 |
| 153 | 1.25 | 1.4  | -184.3520705 | -184.3867358 | 1.86085 | 0.91761 |
| 153 | 1.25 | 1.45 | -184.3397553 | -184.3808955 | 2.19595 | 1.07652 |
| 153 | 1.3  | 1    | -184.2886975 | -184.2648998 | 3.58523 | 4.23277 |
| 153 | 1.3  | 1.05 | -184.3323198 | -184.315929  | 2.39827 | 2.84426 |
| 153 | 1.3  | 1.1  | -184.3571429 | -184.3493541 | 1.72283 | 1.93476 |
| 153 | 1.3  | 1.15 | -184.3685936 | -184.3694887 | 1.41126 | 1.3869  |
| 153 | 1.3  | 1.2  | -184.370692  | -184.3802687 | 1.35416 | 1.09358 |
| 153 | 1.3  | 1.25 | -184.36641   | -184.3845152 | 1.47067 | 0.97803 |
| 153 | 1.3  | 1.3  | -184.3579419 | -184.384349  | 1.70109 | 0.98255 |
| 153 | 1.3  | 1.35 | -184.3469013 | -184.3813605 | 2.00151 | 1.06387 |
| 153 | 1.3  | 1.4  | -184.3344724 | -184.376737  | 2.3397  | 1.18968 |
| 153 | 1.3  | 1.45 | -184.3215112 | -184.369136  | 2.69237 | 1.3965  |
| 153 | 1.35 | 1    | -184.2740922 | -184.2557935 | 3.98264 | 4.48055 |
| 153 | 1.35 | 1.05 | -184.3168375 | -184.3063025 | 2.81954 | 3.1062  |
| 153 | 1.35 | 1.1  | -184.3409523 | -184.3399336 | 2.16338 | 2.1911  |
| 153 | 1.35 | 1.15 | -184.3518269 | -184.3596744 | 1.86748 | 1.65395 |
| 153 | 1.35 | 1.2  | -184.3534364 | -184.3699944 | 1.82369 | 1.37314 |
| 153 | 1.35 | 1.25 | -184.3487047 | -184.3737366 | 1.95244 | 1.27132 |
| 153 | 1.35 | 1.3  | -184.3397788 | -184.3730271 | 2.19531 | 1.29062 |
| 153 | 1.35 | 1.35 | -184.3282361 | -184.3694475 | 2.50938 | 1.38802 |
| 153 | 1.35 | 1.4  | -184.3152426 | -184.364173  | 2.86294 | 1.53154 |
| 153 | 1.35 | 1.45 | -184.3016648 | -184.3549422 | 3.23239 | 1.78271 |
| 153 | 1.4  | 1    | -184.2583705 | -184.2457283 | 4.41043 | 4.75442 |
| 153 | 1.4  | 1.05 | -184.3002873 | -184.2954167 | 3.26987 | 3.4024  |
| 153 | 1.4  | 1.1  | -184.3237777 | -184.3292515 | 2.6307  | 2.48176 |
| 153 | 1.4  | 1.15 | -184.3342108 | -184.3484684 | 2.34681 | 1.95887 |
| 153 | 1.4  | 1.2  | -184.335515  | -184.3582455 | 2.31133 | 1.69283 |
| 153 | 1.4  | 1.25 | -184.330548  | -184.3614567 | 2.44648 | 1.60545 |
| 153 | 1.4  | 1.3  | -184.3213916 | -184.3602195 | 2.69563 | 1.63912 |
| 153 | 1.4  | 1.35 | -184.3095712 | -184.3560915 | 3.01726 | 1.75144 |
| 153 | 1.4  | 1.4  | -184.2962054 | -184.3502266 | 3.38094 | 1.91102 |
| 153 | 1.4  | 1.45 | -184.2821222 | -184.3394867 | 3.76414 | 2.20326 |
| 153 | 1.45 | 1    | -184.242372  | -184.2355621 | 4.84575 | 5.03104 |
| 153 | 1.45 | 1.05 | -184.2834957 | -184.2843083 | 3.72677 | 3.70466 |
| 153 | 1.45 | 1.1  | -184.3064386 | -184.3181133 | 3.1025  | 2.78483 |
| 153 | 1.45 | 1.15 | -184.3165645 | -184.3367079 | 2.82697 | 2.27887 |
| 153 | 1.45 | 1.2  | -184.3177448 | -184.3458855 | 2.79485 | 2.02915 |
| 153 | 1.45 | 1.25 | -184.3127625 | -184.3485588 | 2.93042 | 1.9564  |
| 153 | 1.45 | 1.3  | -184.3036419 | -184.3468259 | 3.17859 | 2.00356 |
| 153 | 1.45 | 1.35 | -184.2918692 | -184.3422055 | 3.49893 | 2.12928 |

|     |      |      |              |              |         |         |
|-----|------|------|--------------|--------------|---------|---------|
| 153 | 1.45 | 1.4  | -184.2785403 | -184.3358205 | 3.86161 | 2.30301 |
| 153 | 1.45 | 1.45 | -184.2644477 | -184.3235907 | 4.24507 | 2.63579 |
| 154 | 1    | 1    | -184.2438269 | -184.1948289 | 4.80616 | 6.1394  |
| 154 | 1    | 1.05 | -184.2939341 | -184.2465477 | 3.44274 | 4.73213 |
| 154 | 1    | 1.1  | -184.3244286 | -184.2794153 | 2.61299 | 3.8378  |
| 154 | 1    | 1.15 | -184.3409853 | -184.2991641 | 2.16248 | 3.30043 |
| 154 | 1    | 1.2  | -184.3478378 | -184.3101016 | 1.97602 | 3.00282 |
| 154 | 1    | 1.25 | -184.3481327 | -184.3153553 | 1.968   | 2.85987 |
| 154 | 1    | 1.3  | -184.3441854 | -184.3171996 | 2.07541 | 2.80969 |
| 154 | 1    | 1.35 | -184.3376695 | -184.3174703 | 2.2527  | 2.80232 |
| 154 | 1    | 1.4  | -184.3297599 | -184.3174381 | 2.46792 | 2.8032  |
| 154 | 1    | 1.45 | -184.3212547 | -184.3179813 | 2.69935 | 2.78842 |
| 154 | 1.05 | 1    | -184.2843764 | -184.2383218 | 3.70281 | 4.95595 |
| 154 | 1.05 | 1.05 | -184.3331207 | -184.2893258 | 2.37648 | 3.56813 |
| 154 | 1.05 | 1.1  | -184.3623917 | -184.3218624 | 1.58001 | 2.68281 |
| 154 | 1.05 | 1.15 | -184.3778219 | -184.341502  | 1.16016 | 2.14842 |
| 154 | 1.05 | 1.2  | -184.3836122 | -184.3522752 | 1.0026  | 1.85528 |
| 154 | 1.05 | 1.25 | -184.3828887 | -184.3574567 | 1.02229 | 1.71429 |
| 154 | 1.05 | 1.3  | -184.3779568 | -184.359229  | 1.15649 | 1.66607 |
| 154 | 1.05 | 1.35 | -184.3704943 | -184.3591615 | 1.35954 | 1.6679  |
| 154 | 1.05 | 1.4  | -184.3616868 | -184.3584416 | 1.59919 | 1.68749 |
| 154 | 1.05 | 1.45 | -184.3523478 | -184.3579566 | 1.8533  | 1.70069 |
| 154 | 1.1  | 1    | -184.3055463 | -184.2627773 | 3.12677 | 4.29052 |
| 154 | 1.1  | 1.05 | -184.3530673 | -184.3134494 | 1.83373 | 2.91173 |
| 154 | 1.1  | 1.1  | -184.3812456 | -184.3457522 | 1.067   | 2.03277 |
| 154 | 1.1  | 1.15 | -184.3956729 | -184.3653016 | 0.67443 | 1.50083 |
| 154 | 1.1  | 1.2  | -184.4005174 | -184.3763299 | 0.54261 | 1.20075 |
| 154 | 1.1  | 1.25 | -184.3988779 | -184.3816076 | 0.58722 | 1.05715 |
| 154 | 1.1  | 1.3  | -184.393048  | -184.3831888 | 0.74585 | 1.01412 |
| 154 | 1.1  | 1.35 | -184.3847014 | -184.3826245 | 0.97297 | 1.02948 |
| 154 | 1.1  | 1.4  | -184.3750333 | -184.3810991 | 1.23603 | 1.07098 |
| 154 | 1.1  | 1.45 | -184.3648716 | -184.3795165 | 1.51253 | 1.11405 |
| 154 | 1.15 | 1    | -184.3129823 | -184.2739635 | 2.92444 | 3.98614 |
| 154 | 1.15 | 1.05 | -184.3593898 | -184.3242601 | 1.66169 | 2.61757 |
| 154 | 1.15 | 1.1  | -184.3865855 | -184.3566029 | 0.9217  | 1.73753 |
| 154 | 1.15 | 1.15 | -184.4001185 | -184.3765529 | 0.55346 | 1.19468 |
| 154 | 1.15 | 1.2  | -184.4041211 | -184.3877628 | 0.44456 | 0.88966 |
| 154 | 1.15 | 1.25 | -184.4016653 | -184.3929631 | 0.51138 | 0.74816 |
| 154 | 1.15 | 1.3  | -184.3950283 | -184.394209  | 0.69197 | 0.71426 |
| 154 | 1.15 | 1.35 | -184.3858726 | -184.393059  | 0.9411  | 0.74556 |
| 154 | 1.15 | 1.4  | -184.3753986 | -184.3907001 | 1.22609 | 0.80974 |
| 154 | 1.15 | 1.45 | -184.3644455 | -184.3880356 | 1.52413 | 0.88224 |
| 154 | 1.2  | 1    | -184.310905  | -184.2758573 | 2.98096 | 3.93461 |
| 154 | 1.2  | 1.05 | -184.3562842 | -184.3261171 | 1.7462  | 2.56704 |
| 154 | 1.2  | 1.1  | -184.3825836 | -184.3589085 | 1.03059 | 1.67479 |
| 154 | 1.2  | 1.15 | -184.3953124 | -184.3790816 | 0.68424 | 1.12588 |
| 154 | 1.2  | 1.2  | -184.3985667 | -184.3902803 | 0.59569 | 0.82116 |
| 154 | 1.2  | 1.25 | -184.3953895 | -184.3952345 | 0.68214 | 0.68636 |
| 154 | 1.2  | 1.3  | -184.3880321 | -184.3960296 | 0.88233 | 0.66472 |
| 154 | 1.2  | 1.35 | -184.3781472 | -184.394272  | 1.1513  | 0.71255 |
| 154 | 1.2  | 1.4  | -184.3669323 | -184.3910107 | 1.45646 | 0.80129 |
| 154 | 1.2  | 1.45 | -184.3552338 | -184.3871999 | 1.77478 | 0.90498 |
| 154 | 1.25 | 1    | -184.3024643 | -184.2716897 | 3.21064 | 4.04801 |
| 154 | 1.25 | 1.05 | -184.3468797 | -184.3224178 | 2.00209 | 2.6677  |
| 154 | 1.25 | 1.1  | -184.372353  | -184.3554188 | 1.30897 | 1.76974 |
| 154 | 1.25 | 1.15 | -184.3843536 | -184.3756181 | 0.98243 | 1.22012 |
| 154 | 1.25 | 1.2  | -184.3869404 | -184.3866419 | 0.91204 | 0.92016 |
| 154 | 1.25 | 1.25 | -184.3831247 | -184.39127   | 1.01587 | 0.79423 |
| 154 | 1.25 | 1.3  | -184.3751304 | -184.391598  | 1.23339 | 0.78531 |
| 154 | 1.25 | 1.35 | -184.3645935 | -184.3892096 | 1.5201  | 0.8503  |
| 154 | 1.25 | 1.4  | -184.3527063 | -184.3852987 | 1.84355 | 0.95671 |
| 154 | 1.25 | 1.45 | -184.3403196 | -184.3795147 | 2.18059 | 1.11409 |
| 154 | 1.3  | 1    | -184.2899947 | -184.2642461 | 3.54993 | 4.25055 |
| 154 | 1.3  | 1.05 | -184.3334992 | -184.3151515 | 2.36618 | 2.86542 |
| 154 | 1.3  | 1.1  | -184.3582085 | -184.3481827 | 1.69384 | 1.96664 |
| 154 | 1.3  | 1.15 | -184.3695507 | -184.3681964 | 1.38521 | 1.42207 |
| 154 | 1.3  | 1.2  | -184.3715474 | -184.3789061 | 1.33089 | 1.13066 |
| 154 | 1.3  | 1.25 | -184.3671718 | -184.383112  | 1.44994 | 1.01621 |
| 154 | 1.3  | 1.3  | -184.3586189 | -184.3829253 | 1.68267 | 1.02129 |
| 154 | 1.3  | 1.35 | -184.3475025 | -184.3799312 | 1.98515 | 1.10276 |
| 154 | 1.3  | 1.4  | -184.3350064 | -184.3753171 | 2.32517 | 1.22831 |
| 154 | 1.3  | 1.45 | -184.3219845 | -184.3677665 | 2.67949 | 1.43376 |
| 154 | 1.35 | 1    | -184.2752054 | -184.25488   | 3.95235 | 4.50541 |

|     |      |      |              |              |         |         |
|-----|------|------|--------------|--------------|---------|---------|
| 154 | 1.35 | 1.05 | -184.317846  | -184.3058341 | 2.7921  | 3.11894 |
| 154 | 1.35 | 1.1  | -184.3418551 | -184.3386496 | 2.13881 | 2.22604 |
| 154 | 1.35 | 1.15 | -184.3526252 | -184.3583251 | 1.84576 | 1.69066 |
| 154 | 1.35 | 1.2  | -184.354135  | -184.3686108 | 1.80467 | 1.41079 |
| 154 | 1.35 | 1.25 | -184.3493118 | -184.3723341 | 1.93592 | 1.30948 |
| 154 | 1.35 | 1.3  | -184.3403045 | -184.3716164 | 2.18101 | 1.32901 |
| 154 | 1.35 | 1.35 | -184.3286917 | -184.3680386 | 2.49699 | 1.42636 |
| 154 | 1.35 | 1.4  | -184.3156407 | -184.3627768 | 2.85211 | 1.56953 |
| 154 | 1.35 | 1.45 | -184.3020165 | -184.353587  | 3.22282 | 1.81959 |
| 154 | 1.4  | 1    | -184.2593177 | -184.2446059 | 4.38466 | 4.78496 |
| 154 | 1.4  | 1.05 | -184.3011386 | -184.2954836 | 3.24671 | 3.40058 |
| 154 | 1.4  | 1.1  | -184.3245236 | -184.3279104 | 2.6104  | 2.51825 |
| 154 | 1.4  | 1.15 | -184.3348483 | -184.3471056 | 2.32947 | 1.99595 |
| 154 | 1.4  | 1.2  | -184.3360487 | -184.3568695 | 2.2968  | 1.73027 |
| 154 | 1.4  | 1.25 | -184.3309873 | -184.3600686 | 2.43452 | 1.64322 |
| 154 | 1.4  | 1.3  | -184.3217479 | -184.358827  | 2.68593 | 1.67701 |
| 154 | 1.4  | 1.35 | -184.3098509 | -184.3547032 | 3.00965 | 1.78922 |
| 154 | 1.4  | 1.4  | -184.2964194 | -184.3488537 | 3.37512 | 1.94838 |
| 154 | 1.4  | 1.45 | -184.2822834 | -184.3381416 | 3.75976 | 2.23986 |
| 154 | 1.45 | 1    | -184.2431724 | -184.2342744 | 4.82397 | 5.06608 |
| 154 | 1.45 | 1.05 | -184.284205  | -184.2848496 | 3.70747 | 3.68993 |
| 154 | 1.45 | 1.1  | -184.3070403 | -184.3167516 | 3.08612 | 2.82188 |
| 154 | 1.45 | 1.15 | -184.3170553 | -184.3353536 | 2.81362 | 2.31572 |
| 154 | 1.45 | 1.2  | -184.3181338 | -184.344526  | 2.78427 | 2.06614 |
| 154 | 1.45 | 1.25 | -184.3130627 | -184.3471904 | 2.92225 | 1.99364 |
| 154 | 1.45 | 1.3  | -184.3038635 | -184.3454544 | 3.17256 | 2.04088 |
| 154 | 1.45 | 1.35 | -184.2920186 | -184.3408387 | 3.49486 | 2.16647 |
| 154 | 1.45 | 1.4  | -184.2786196 | -184.3344717 | 3.85945 | 2.33971 |
| 154 | 1.45 | 1.45 | -184.2644636 | -184.322246  | 4.24464 | 2.67237 |
| 155 | 1    | 1    | -184.2463971 | -184.1968422 | 4.73622 | 6.08461 |
| 155 | 1    | 1.05 | -184.2962579 | -184.2481163 | 3.37951 | 4.68945 |
| 155 | 1    | 1.1  | -184.3265206 | -184.2805148 | 2.55607 | 3.80788 |
| 155 | 1    | 1.15 | -184.3428604 | -184.2997758 | 2.11146 | 3.28379 |
| 155 | 1    | 1.2  | -184.3495108 | -184.31023   | 1.9305  | 2.99933 |
| 155 | 1    | 1.25 | -184.3496184 | -184.3150895 | 1.92757 | 2.8671  |
| 155 | 1    | 1.3  | -184.3454984 | -184.3165954 | 2.03968 | 2.82613 |
| 155 | 1    | 1.35 | -184.3388246 | -184.3165746 | 2.22127 | 2.82669 |
| 155 | 1    | 1.4  | -184.3307718 | -184.3163558 | 2.44039 | 2.83265 |
| 155 | 1    | 1.45 | -184.322138  | -184.3168248 | 2.67531 | 2.81989 |
| 155 | 1    | 1.5  | -184.3134437 | -184.3184851 | 2.91189 | 2.77471 |
| 155 | 1.05 | 1    | -184.2867007 | -184.239909  | 3.63956 | 4.91277 |
| 155 | 1.05 | 1.05 | -184.3352258 | -184.2904284 | 2.3192  | 3.53813 |
| 155 | 1.05 | 1.1  | -184.3642907 | -184.3224582 | 1.52834 | 2.6666  |
| 155 | 1.05 | 1.15 | -184.3795282 | -184.3416498 | 1.11373 | 2.1444  |
| 155 | 1.05 | 1.2  | -184.3851392 | -184.3519989 | 0.96105 | 1.8628  |
| 155 | 1.05 | 1.25 | -184.3842494 | -184.3567789 | 0.98526 | 1.73273 |
| 155 | 1.05 | 1.3  | -184.3791641 | -184.3582556 | 1.12363 | 1.69255 |
| 155 | 1.05 | 1.35 | -184.3715608 | -184.35799   | 1.33052 | 1.69978 |
| 155 | 1.05 | 1.4  | -184.3626251 | -184.3571607 | 1.57366 | 1.72235 |
| 155 | 1.05 | 1.45 | -184.3531703 | -184.3566538 | 1.83093 | 1.73614 |
| 155 | 1.05 | 1.5  | -184.3437316 | -184.3570645 | 2.08775 | 1.72497 |
| 155 | 1.1  | 1    | -184.3076312 | -184.2639057 | 3.07004 | 4.25982 |
| 155 | 1.1  | 1.05 | -184.3549583 | -184.314055  | 1.78227 | 2.89525 |
| 155 | 1.1  | 1.1  | -184.3829551 | -184.3459389 | 1.02048 | 2.02769 |
| 155 | 1.1  | 1.15 | -184.397212  | -184.3649742 | 0.63255 | 1.50974 |
| 155 | 1.1  | 1.2  | -184.4018981 | -184.3755988 | 0.50504 | 1.22065 |
| 155 | 1.1  | 1.25 | -184.4001119 | -184.3805866 | 0.55364 | 1.08493 |
| 155 | 1.1  | 1.3  | -184.3941467 | -184.3819686 | 0.71596 | 1.04732 |
| 155 | 1.1  | 1.35 | -184.3856757 | -184.3812794 | 0.94645 | 1.06608 |
| 155 | 1.1  | 1.4  | -184.375894  | -184.379695  | 1.21261 | 1.10919 |
| 155 | 1.1  | 1.45 | -184.3656292 | -184.378118  | 1.49192 | 1.1521  |
| 155 | 1.1  | 1.5  | -184.355433  | -184.377207  | 1.76936 | 1.17689 |
| 155 | 1.15 | 1    | -184.3148359 | -184.2746012 | 2.874   | 3.96879 |
| 155 | 1.15 | 1.05 | -184.3610739 | -184.3244839 | 1.61587 | 2.61148 |
| 155 | 1.15 | 1.1  | -184.3881096 | -184.3562586 | 0.88023 | 1.74689 |
| 155 | 1.15 | 1.15 | -184.4014933 | -184.3757984 | 0.51606 | 1.21522 |
| 155 | 1.15 | 1.2  | -184.4053567 | -184.3867212 | 0.41093 | 0.91801 |
| 155 | 1.15 | 1.25 | -184.4027733 | -184.3917262 | 0.48123 | 0.78182 |
| 155 | 1.15 | 1.3  | -184.3960166 | -184.3928451 | 0.66508 | 0.75137 |
| 155 | 1.15 | 1.35 | -184.3867519 | -184.391621  | 0.91717 | 0.78468 |
| 155 | 1.15 | 1.4  | -184.3761781 | -184.3892345 | 1.20488 | 0.84962 |
| 155 | 1.15 | 1.45 | -184.3651342 | -184.3865896 | 1.50539 | 0.92159 |
| 155 | 1.15 | 1.5  | -184.3541873 | -184.3843609 | 1.80325 | 0.98223 |

|     |      |      |              |              |         |         |
|-----|------|------|--------------|--------------|---------|---------|
| 155 | 1.2  | 1    | -184.3125392 | -184.2761593 | 2.9365  | 3.9264  |
| 155 | 1.2  | 1.05 | -184.3577704 | -184.325793  | 1.70576 | 2.57586 |
| 155 | 1.2  | 1.1  | -184.38393   | -184.3581529 | 0.99395 | 1.69535 |
| 155 | 1.2  | 1.15 | -184.396528  | -184.3780321 | 0.65116 | 1.15444 |
| 155 | 1.2  | 1.2  | -184.3996605 | -184.3890287 | 0.56593 | 0.85522 |
| 155 | 1.2  | 1.25 | -184.3963706 | -184.3938452 | 0.65545 | 0.72416 |
| 155 | 1.2  | 1.3  | -184.3889093 | -184.3945659 | 0.85847 | 0.70455 |
| 155 | 1.2  | 1.35 | -184.3789292 | -184.3927692 | 1.13003 | 0.75344 |
| 155 | 1.2  | 1.4  | -184.3676264 | -184.3896467 | 1.43757 | 0.8384  |
| 155 | 1.2  | 1.45 | -184.3558498 | -184.3857681 | 1.75802 | 0.94394 |
| 155 | 1.2  | 1.5  | -184.3441779 | -184.3821834 | 2.07561 | 1.04148 |
| 155 | 1.25 | 1    | -184.3038921 | -184.2714299 | 3.17179 | 4.05508 |
| 155 | 1.25 | 1.05 | -184.3481789 | -184.3216756 | 1.96674 | 2.6879  |
| 155 | 1.25 | 1.1  | -184.3735298 | -184.3539554 | 1.27694 | 1.80956 |
| 155 | 1.25 | 1.15 | -184.3854157 | -184.3743865 | 0.95353 | 1.25363 |
| 155 | 1.25 | 1.2  | -184.3878953 | -184.385287  | 0.88606 | 0.95703 |
| 155 | 1.25 | 1.25 | -184.3839797 | -184.3898409 | 0.9926  | 0.83312 |
| 155 | 1.25 | 1.3  | -184.3758954 | -184.3901266 | 1.21258 | 0.82535 |
| 155 | 1.25 | 1.35 | -184.3652756 | -184.3877189 | 1.50154 | 0.89086 |
| 155 | 1.25 | 1.4  | -184.3533128 | -184.3838101 | 1.82705 | 0.99722 |
| 155 | 1.25 | 1.45 | -184.3408583 | -184.3780831 | 2.16593 | 1.15305 |
| 155 | 1.25 | 1.5  | -184.3285001 | -184.3734339 | 2.5022  | 1.27955 |
| 155 | 1.3  | 1    | -184.2912306 | -184.2635622 | 3.5163  | 4.26916 |
| 155 | 1.3  | 1.05 | -184.3346231 | -184.3141532 | 2.3356  | 2.89258 |
| 155 | 1.3  | 1.1  | -184.3592241 | -184.3454895 | 1.6662  | 2.03992 |
| 155 | 1.3  | 1.15 | -184.3704634 | -184.3668514 | 1.36038 | 1.45866 |
| 155 | 1.3  | 1.2  | -184.3723634 | -184.3774909 | 1.30868 | 1.16916 |
| 155 | 1.3  | 1.25 | -184.3678989 | -184.3816575 | 1.43016 | 1.05579 |
| 155 | 1.3  | 1.3  | -184.3592653 | -184.3814515 | 1.66508 | 1.0614  |
| 155 | 1.3  | 1.35 | -184.3480767 | -184.378453  | 1.96952 | 1.14298 |
| 155 | 1.3  | 1.4  | -184.3355165 | -184.3738488 | 2.31129 | 1.26826 |
| 155 | 1.3  | 1.45 | -184.3224386 | -184.3663526 | 2.66713 | 1.47224 |
| 155 | 1.3  | 1.5  | -184.3094398 | -184.3607519 | 3.02083 | 1.62463 |
| 155 | 1.35 | 1    | -184.2762653 | -184.2539265 | 3.92351 | 4.53135 |
| 155 | 1.35 | 1.05 | -184.3188068 | -184.3046296 | 2.76596 | 3.15172 |
| 155 | 1.35 | 1.1  | -184.3427157 | -184.3348817 | 2.11539 | 2.32856 |
| 155 | 1.35 | 1.15 | -184.3533871 | -184.3569213 | 1.82503 | 1.72886 |
| 155 | 1.35 | 1.2  | -184.3548025 | -184.3671748 | 1.78651 | 1.44986 |
| 155 | 1.35 | 1.25 | -184.3498922 | -184.3708827 | 1.92012 | 1.34897 |
| 155 | 1.35 | 1.3  | -184.3408074 | -184.3701595 | 2.16732 | 1.36865 |
| 155 | 1.35 | 1.35 | -184.3291284 | -184.3665854 | 2.48511 | 1.4659  |
| 155 | 1.35 | 1.4  | -184.3160227 | -184.3613375 | 2.84171 | 1.6087  |
| 155 | 1.35 | 1.45 | -184.3023546 | -184.3521927 | 3.21362 | 1.85753 |
| 155 | 1.35 | 1.5  | -184.2887387 | -184.3457379 | 3.58411 | 2.03316 |
| 155 | 1.4  | 1    | -184.2602187 | -184.2436172 | 4.36014 | 4.81186 |
| 155 | 1.4  | 1.05 | -184.301949  | -184.2941526 | 3.22466 | 3.4368  |
| 155 | 1.4  | 1.1  | -184.3252351 | -184.3231239 | 2.59104 | 2.64849 |
| 155 | 1.4  | 1.15 | -184.3354565 | -184.3456887 | 2.31292 | 2.0345  |
| 155 | 1.4  | 1.2  | -184.3365569 | -184.3554454 | 2.28298 | 1.76902 |
| 155 | 1.4  | 1.25 | -184.3314041 | -184.3586382 | 2.42318 | 1.68215 |
| 155 | 1.4  | 1.3  | -184.3220832 | -184.3573947 | 2.67681 | 1.71598 |
| 155 | 1.4  | 1.35 | -184.310114  | -184.3532767 | 3.00249 | 1.82803 |
| 155 | 1.4  | 1.4  | -184.2966202 | -184.3474432 | 3.36965 | 1.98676 |
| 155 | 1.4  | 1.45 | -184.2824346 | -184.3367627 | 3.75564 | 2.27738 |
| 155 | 1.4  | 1.5  | -184.268193  | -184.3295197 | 4.14316 | 2.47446 |
| 155 | 1.45 | 1    | -184.2439335 | -184.2332627 | 4.80326 | 5.09361 |
| 155 | 1.45 | 1.05 | -184.2848809 | -184.2834462 | 3.68908 | 3.72812 |
| 155 | 1.45 | 1.1  | -184.3076138 | -184.3109612 | 3.07052 | 2.97944 |
| 155 | 1.45 | 1.15 | -184.3175209 | -184.3339503 | 2.80095 | 2.3539  |
| 155 | 1.45 | 1.2  | -184.3184997 | -184.3431251 | 2.77431 | 2.10426 |
| 155 | 1.45 | 1.25 | -184.3133415 | -184.3457837 | 2.91467 | 2.03192 |
| 155 | 1.45 | 1.3  | -184.3040657 | -184.3440459 | 3.16706 | 2.0792  |
| 155 | 1.45 | 1.35 | -184.2921506 | -184.339439  | 3.49127 | 2.20455 |
| 155 | 1.45 | 1.4  | -184.278685  | -184.3330887 | 3.85767 | 2.37735 |
| 155 | 1.45 | 1.45 | -184.2644671 | -184.320872  | 4.24454 | 2.70976 |
| 155 | 1.45 | 1.5  | -184.250067  | -184.3128729 | 4.63637 | 2.92742 |
| 155 | 1.5  | 1    | -184.2279605 | -184.223139  | 5.23788 | 5.36908 |
| 155 | 1.5  | 1.05 | -184.2681306 | -184.2708071 | 4.14486 | 4.07203 |
| 155 | 1.5  | 1.1  | -184.2903399 | -184.3016982 | 3.54054 | 3.23148 |
| 155 | 1.5  | 1.15 | -184.2999994 | -184.3194479 | 3.27771 | 2.74851 |
| 155 | 1.5  | 1.2  | -184.3009554 | -184.3278118 | 3.25169 | 2.52093 |
| 155 | 1.5  | 1.25 | -184.295925  | -184.3295726 | 3.38857 | 2.47302 |
| 155 | 1.5  | 1.3  | -184.2868705 | -184.3266876 | 3.63494 | 2.55152 |

|     |      |      |              |              |         |         |
|-----|------|------|--------------|--------------|---------|---------|
| 155 | 1.5  | 1.35 | -184.2752465 | -184.3205135 | 3.95123 | 2.71952 |
| 155 | 1.5  | 1.4  | -184.2621473 | -184.3132196 | 4.30766 | 2.91798 |
| 155 | 1.5  | 1.5  | -184.2344769 | -184.296256  | 5.06057 | 3.37956 |
| 160 | 1    | 1    | -184.2575611 | -184.2059198 | 4.43245 | 5.83761 |
| 160 | 1    | 1.05 | -184.3063504 | -184.2553386 | 3.10489 | 4.49293 |
| 160 | 1    | 1.1  | -184.335607  | -184.2857593 | 2.30882 | 3.66518 |
| 160 | 1    | 1.15 | -184.3510057 | -184.3029114 | 1.88982 | 3.19847 |
| 160 | 1    | 1.2  | -184.3567805 | -184.3111416 | 1.73269 | 2.97453 |
| 160 | 1    | 1.25 | -184.3560775 | -184.3137683 | 1.75182 | 2.90305 |
| 160 | 1    | 1.3  | -184.3512112 | -184.3133621 | 1.88423 | 2.91411 |
| 160 | 1    | 1.35 | -184.3438549 | -184.3119604 | 2.0844  | 2.95225 |
| 160 | 1    | 1.4  | -184.3351837 | -184.3107296 | 2.32034 | 2.98574 |
| 160 | 1    | 1.45 | -184.3259943 | -184.3106986 | 2.57039 | 2.98658 |
| 160 | 1    | 1.5  | -184.316805  | -184.3124921 | 2.82043 | 2.93778 |
| 160 | 1    | 1.6  | -            | -184.3208085 | -       | 2.71149 |
| 160 | 1    | 1.7  | -            | -184.3321124 | -       | 2.40391 |
| 160 | 1    | 1.8  | -            | -184.3429295 | -       | 2.10958 |
| 160 | 1    | 1.9  | -            | -184.3518524 | -       | 1.86678 |
| 160 | 1    | 2    | -            | -184.3586825 | -       | 1.68094 |
| 160 | 1    | 2.1  | -            | -184.3636709 | -       | 1.5452  |
| 160 | 1    | 2.2  | -            | -184.3671866 | -       | 1.44954 |
| 160 | 1    | 2.3  | -            | -184.3695851 | -       | 1.38428 |
| 160 | 1    | 2.4  | -            | -184.3711653 | -       | 1.34128 |
| 160 | 1    | 2.5  | -            | -184.372164  | -       | 1.31411 |
| 160 | 1    | 2.6  | -            | -184.3727614 | -       | 1.29785 |
| 160 | 1    | 2.7  | -            | -184.3730898 | -       | 1.28892 |
| 160 | 1    | 2.8  | -            | -184.3732423 | -       | 1.28477 |
| 160 | 1    | 2.9  | -            | -184.3732834 | -       | 1.28365 |
| 160 | 1    | 3    | -            | -184.3732549 | -       | 1.28442 |
| 160 | 1.05 | 1    | -184.2967827 | -184.2472006 | 3.36523 | 4.71436 |
| 160 | 1.05 | 1.05 | -184.3443546 | -184.2956854 | 2.0708  | 3.39509 |
| 160 | 1.05 | 1.1  | -184.3725245 | -184.3255066 | 1.3043  | 2.58365 |
| 160 | 1.05 | 1.15 | -184.386927  | -184.3423972 | 0.9124  | 2.12406 |
| 160 | 1.05 | 1.2  | -184.391762  | -184.3507109 | 0.78085 | 1.89785 |
| 160 | 1.05 | 1.25 | -184.3901535 | -184.3536035 | 0.82461 | 1.81914 |
| 160 | 1.05 | 1.3  | -184.3844063 | -184.3532709 | 0.981   | 1.82819 |
| 160 | 1.05 | 1.35 | -184.3761951 | -184.3517709 | 1.20442 | 1.869   |
| 160 | 1.05 | 1.4  | -184.3667075 | -184.3502514 | 1.46258 | 1.91035 |
| 160 | 1.05 | 1.45 | -184.3567534 | -184.3495926 | 1.73343 | 1.92828 |
| 160 | 1.05 | 1.5  | -184.3468668 | -184.350372  | 2.00244 | 1.90707 |
| 160 | 1.05 | 1.6  | -            | -184.3562347 | -       | 1.74754 |
| 160 | 1.05 | 1.7  | -            | -184.3653579 | -       | 1.4993  |
| 160 | 1.05 | 1.8  | -            | -184.3746682 | -       | 1.24597 |
| 160 | 1.05 | 1.9  | -            | -184.3825731 | -       | 1.03088 |
| 160 | 1.05 | 2    | -            | -184.3887016 | -       | 0.86412 |
| 160 | 1.05 | 2.1  | -            | -184.3931946 | -       | 0.74186 |
| 160 | 1.05 | 2.2  | -            | -184.3963527 | -       | 0.65593 |
| 160 | 1.05 | 2.3  | -            | -184.3984878 | -       | 0.59784 |
| 160 | 1.05 | 2.4  | -            | -184.3998705 | -       | 0.56021 |
| 160 | 1.05 | 2.5  | -            | -184.4007188 | -       | 0.53713 |
| 160 | 1.05 | 2.6  | -            | -184.4012    | -       | 0.52404 |
| 160 | 1.05 | 2.7  | -            | -184.4014367 | -       | 0.5176  |
| 160 | 1.05 | 2.8  | -            | -184.4015159 | -       | 0.51544 |
| 160 | 1.05 | 2.9  | -            | -184.4014961 | -       | 0.51598 |
| 160 | 1.05 | 3    | -            | -184.4014166 | -       | 0.51814 |
| 160 | 1.1  | 1    | -184.3166587 | -184.2692772 | 2.82441 | 4.11366 |
| 160 | 1.1  | 1.05 | -184.363144  | -184.3171405 | 1.55954 | 2.8113  |
| 160 | 1.1  | 1.1  | -184.390351  | -184.3467448 | 0.81924 | 2.00576 |
| 160 | 1.1  | 1.15 | -184.4038721 | -184.363751  | 0.45133 | 1.54302 |
| 160 | 1.1  | 1.2  | -184.4078737 | -184.3719606 | 0.34245 | 1.31964 |
| 160 | 1.1  | 1.25 | -184.4054537 | -184.375193  | 0.40829 | 1.23169 |
| 160 | 1.1  | 1.3  | -184.3989071 | -184.3753746 | 0.58643 | 1.22675 |
| 160 | 1.1  | 1.35 | -184.3899009 | -184.3739268 | 0.83148 | 1.26614 |
| 160 | 1.1  | 1.4  | -184.3796291 | -184.3719757 | 1.11098 | 1.31923 |
| 160 | 1.1  | 1.45 | -184.3689229 | -184.3704262 | 1.4023  | 1.36139 |
| 160 | 1.1  | 1.5  | -184.3583267 | -184.3699637 | 1.69062 | 1.37398 |
| 160 | 1.1  | 1.6  | -            | -184.3732146 | -       | 1.28552 |
| 160 | 1.1  | 1.7  | -            | -184.3800315 | -       | 1.10003 |
| 160 | 1.1  | 1.8  | -            | -184.3876876 | -       | 0.89171 |
| 160 | 1.1  | 1.9  | -            | -184.3944679 | -       | 0.70722 |
| 160 | 1.1  | 2    | -            | -184.3998154 | -       | 0.56171 |
| 160 | 1.1  | 2.1  | -            | -184.4037536 | -       | 0.45455 |
| 160 | 1.1  | 2.2  | -            | -184.4065096 | -       | 0.37956 |

|     |      |      |              |              |         |         |
|-----|------|------|--------------|--------------|---------|---------|
| 160 | 1.1  | 2.3  | -            | -184.4083484 | -       | 0.32953 |
| 160 | 1.1  | 2.4  | -            | -184.4095092 | -       | 0.29794 |
| 160 | 1.1  | 2.5  | -            | -184.4101892 | -       | 0.27944 |
| 160 | 1.1  | 2.6  | -            | -184.4105404 | -       | 0.26988 |
| 160 | 1.1  | 2.7  | -            | -184.4106753 | -       | 0.26621 |
| 160 | 1.1  | 2.8  | -            | -184.4106728 | -       | 0.26628 |
| 160 | 1.1  | 2.9  | -            | -184.4105865 | -       | 0.26863 |
| 160 | 1.1  | 3    | -            | -184.4104517 | -       | 0.2723  |
| 160 | 1.15 | 1    | -184.3228492 | -184.2778818 | 2.65596 | 3.87953 |
| 160 | 1.15 | 1.05 | -184.3683494 | -184.3254688 | 1.4179  | 2.58468 |
| 160 | 1.15 | 1.1  | -184.3946926 | -184.3549737 | 0.7011  | 1.78186 |
| 160 | 1.15 | 1.15 | -184.4074304 | -184.3719318 | 0.35451 | 1.32043 |
| 160 | 1.15 | 1.2  | -184.4106944 | -184.3811341 | 0.26569 | 1.07003 |
| 160 | 1.15 | 1.25 | -184.4075567 | -184.3849794 | 0.35107 | 0.9654  |
| 160 | 1.15 | 1.3  | -184.4002896 | -184.3853493 | 0.54881 | 0.95534 |
| 160 | 1.15 | 1.35 | -184.3905567 | -184.383686  | 0.81364 | 1.00059 |
| 160 | 1.15 | 1.4  | -184.3795547 | -184.3811267 | 1.11301 | 1.07023 |
| 160 | 1.15 | 1.45 | -184.3681217 | -184.3785856 | 1.4241  | 1.13938 |
| 160 | 1.15 | 1.5  | -184.3568224 | -184.376782  | 1.73155 | 1.18845 |
| 160 | 1.15 | 1.6  | -            | -184.3770858 | -       | 1.18019 |
| 160 | 1.15 | 1.7  | -            | -184.3817692 | -       | 1.05275 |
| 160 | 1.15 | 1.8  | -            | -184.3874811 | -       | 0.89733 |
| 160 | 1.15 | 1.9  | -            | -184.3930098 | -       | 0.74689 |
| 160 | 1.15 | 2    | -            | -184.3975093 | -       | 0.62446 |
| 160 | 1.15 | 2.1  | -            | -184.4008478 | -       | 0.53362 |
| 160 | 1.15 | 2.2  | -            | -184.4031715 | -       | 0.47039 |
| 160 | 1.15 | 2.3  | -            | -184.4046929 | -       | 0.429   |
| 160 | 1.15 | 2.4  | -            | -184.4056176 | -       | 0.40384 |
| 160 | 1.15 | 2.5  | -            | -184.4061195 | -       | 0.39018 |
| 160 | 1.15 | 2.6  | -            | -184.406334  | -       | 0.38434 |
| 160 | 1.15 | 2.7  | -            | -184.4063614 | -       | 0.3836  |
| 160 | 1.15 | 2.8  | -            | -184.4062719 | -       | 0.38603 |
| 160 | 1.15 | 2.9  | -            | -184.4061138 | -       | 0.39033 |
| 160 | 1.15 | 3    | -            | -184.4059183 | -       | 0.39565 |
| 160 | 1.2  | 1    | -184.3195894 | -184.2773569 | 2.74466 | 3.89381 |
| 160 | 1.2  | 1.05 | -184.3641786 | -184.3246625 | 1.53139 | 2.60662 |
| 160 | 1.2  | 1.1  | -184.3897337 | -184.354243  | 0.83604 | 1.80174 |
| 160 | 1.2  | 1.15 | -184.4017671 | -184.372347  | 0.50861 | 1.30913 |
| 160 | 1.2  | 1.2  | -184.4043753 | -184.3821779 | 0.43764 | 1.04163 |
| 160 | 1.2  | 1.25 | -184.4006003 | -184.3862769 | 0.54036 | 0.93009 |
| 160 | 1.2  | 1.3  | -184.3926939 | -184.386573  | 0.75549 | 0.92204 |
| 160 | 1.2  | 1.35 | -184.3823055 | -184.3845459 | 1.03816 | 0.9772  |
| 160 | 1.2  | 1.4  | -184.3706309 | -184.3813535 | 1.35582 | 1.06406 |
| 160 | 1.2  | 1.45 | -184.3585156 | -184.3779211 | 1.68548 | 1.15746 |
| 160 | 1.2  | 1.5  | -184.3465368 | -184.3745808 | 2.01142 | 1.24835 |
| 160 | 1.2  | 1.6  | -            | -184.3713636 | -       | 1.33589 |
| 160 | 1.2  | 1.7  | -            | -184.3746739 | -       | 1.24581 |
| 160 | 1.2  | 1.8  | -            | -184.3770071 | -       | 1.18233 |
| 160 | 1.2  | 1.9  | -            | -184.3830669 | -       | 1.01744 |
| 160 | 1.2  | 2    | -            | -184.38666   | -       | 0.91967 |
| 160 | 1.2  | 2.1  | -            | -184.3893308 | -       | 0.847   |
| 160 | 1.2  | 2.2  | -            | -184.3911559 | -       | 0.79734 |
| 160 | 1.2  | 2.3  | -            | -184.3923017 | -       | 0.76616 |
| 160 | 1.2  | 2.4  | -            | -184.3929416 | -       | 0.74875 |
| 160 | 1.2  | 2.5  | -            | -184.3932258 | -       | 0.74101 |
| 160 | 1.2  | 2.6  | -            | -184.3915881 | -       | 0.78558 |
| 160 | 1.2  | 2.7  | -            | -184.3914774 | -       | 0.78859 |
| 160 | 1.2  | 2.8  | -            | -184.3929759 | -       | 0.74782 |
| 160 | 1.2  | 2.9  | -            | -184.3927357 | -       | 0.75435 |
| 160 | 1.2  | 3    | -            | -184.3907635 | -       | 0.80802 |
| 160 | 1.25 | 1    | -184.3100384 | -184.2710776 | 3.00455 | 4.06467 |
| 160 | 1.25 | 1.05 | -184.3537695 | -184.3177377 | 1.81462 | 2.79505 |
| 160 | 1.25 | 1.1  | -184.3785941 | -184.3482885 | 1.13915 | 1.96376 |
| 160 | 1.25 | 1.15 | -184.3899859 | -184.3669048 | 0.82917 | 1.45721 |
| 160 | 1.25 | 1.2  | -184.3920059 | -184.3778145 | 0.77421 | 1.16036 |
| 160 | 1.25 | 1.25 | -184.3876657 | -184.3810991 | 0.89231 | 1.07098 |
| 160 | 1.25 | 1.3  | -184.3791903 | -184.3811726 | 1.12292 | 1.06898 |
| 160 | 1.25 | 1.35 | -184.3682164 | -184.378716  | 1.42152 | 1.13583 |
| 160 | 1.25 | 1.4  | -184.3559312 | -184.3748961 | 1.7558  | 1.23977 |
| 160 | 1.25 | 1.45 | -184.3431851 | -184.3706275 | 2.10262 | 1.35592 |
| 160 | 1.25 | 1.5  | -184.3305638 | -184.3658513 | 2.44605 | 1.48588 |
| 160 | 1.3  | 1    | -184.296538  | -184.2604086 | 3.37189 | 4.35497 |
| 160 | 1.3  | 1.05 | -184.3394498 | -184.307672  | 2.20426 | 3.06893 |

|     |      |      |              |              |         |         |
|-----|------|------|--------------|--------------|---------|---------|
| 160 | 1.3  | 1.1  | -184.3635883 | -184.3388427 | 1.54745 | 2.22078 |
| 160 | 1.3  | 1.15 | -184.3743894 | -184.3577879 | 1.25355 | 1.70528 |
| 160 | 1.3  | 1.2  | -184.3758783 | -184.3697223 | 1.21304 | 1.38055 |
| 160 | 1.3  | 1.25 | -184.3710349 | -184.3718291 | 1.34483 | 1.32322 |
| 160 | 1.3  | 1.3  | -184.3620566 | -184.3715491 | 1.58913 | 1.33084 |
| 160 | 1.3  | 1.35 | -184.3505586 | -184.3686035 | 1.90199 | 1.41099 |
| 160 | 1.3  | 1.4  | -184.3377221 | -184.3641622 | 2.25127 | 1.53184 |
| 160 | 1.3  | 1.45 | -184.3243973 | -184.3591245 | 2.61384 | 1.66891 |
| 160 | 1.3  | 1.5  | -184.31118   | -184.3532917 | 2.97348 | 1.82762 |
| 160 | 1.35 | 1    | -184.2808047 | -184.248084  | 3.79999 | 4.69032 |
| 160 | 1.35 | 1.05 | -184.3229271 | -184.2961202 | 2.65384 | 3.38326 |
| 160 | 1.35 | 1.1  | -184.3464168 | -184.3275948 | 2.01469 | 2.52683 |
| 160 | 1.35 | 1.15 | -184.3566753 | -184.3465333 | 1.73556 | 2.01152 |
| 160 | 1.35 | 1.2  | -184.3576935 | -184.3592968 | 1.70785 | 1.66422 |
| 160 | 1.35 | 1.25 | -184.3524149 | -184.3599921 | 1.85148 | 1.6453  |
| 160 | 1.35 | 1.3  | -184.343002  | -184.3592577 | 2.1076  | 1.66529 |
| 160 | 1.35 | 1.35 | -184.3310421 | -184.355784  | 2.43303 | 1.75981 |
| 160 | 1.35 | 1.4  | -184.3177045 | -184.3507333 | 2.79595 | 1.89724 |
| 160 | 1.35 | 1.45 | -184.3038454 | -184.3449813 | 3.17306 | 2.05375 |
| 160 | 1.35 | 1.5  | -184.290069  | -184.3384253 | 3.54791 | 2.23214 |
| 160 | 1.4  | 1    | -184.2640682 | -184.2358061 | 4.25539 | 5.02441 |
| 160 | 1.4  | 1.05 | -184.3054253 | -184.2840672 | 3.13007 | 3.71122 |
| 160 | 1.4  | 1.1  | -184.328304  | -184.3154783 | 2.50754 | 2.85653 |
| 160 | 1.4  | 1.15 | -184.3380887 | -184.3341211 | 2.2413  | 2.34925 |
| 160 | 1.4  | 1.2  | -184.3387508 | -184.3476287 | 2.22328 | 1.98171 |
| 160 | 1.4  | 1.25 | -184.3331897 | -184.3466602 | 2.3746  | 2.00807 |
| 160 | 1.4  | 1.3  | -184.323505  | -184.3453933 | 2.63812 | 2.04254 |
| 160 | 1.4  | 1.35 | -184.3112212 | -184.341356  | 2.97236 | 2.15239 |
| 160 | 1.4  | 1.4  | -184.2974642 | -184.3357029 | 3.34669 | 2.30621 |
| 160 | 1.4  | 1.45 | -184.2830864 | -184.3292868 | 3.73791 | 2.48079 |
| 160 | 1.4  | 1.5  | -184.2687264 | -184.322341  | 4.12864 | 2.66979 |
| 160 | 1.45 | 1    | -184.2471803 | -184.2242364 | 4.71491 | 5.33922 |
| 160 | 1.45 | 1.05 | -184.287786  | -184.2721295 | 3.61003 | 4.03605 |
| 160 | 1.45 | 1.1  | -184.3100926 | -184.3031578 | 3.00307 | 3.19177 |
| 160 | 1.45 | 1.15 | -184.3195147 | -184.321272  | 2.74669 | 2.69888 |
| 160 | 1.45 | 1.2  | -184.320026  | -184.3355047 | 2.73278 | 2.31161 |
| 160 | 1.45 | 1.25 | -184.3144605 | -184.3326278 | 2.88422 | 2.38989 |
| 160 | 1.45 | 1.3  | -184.3048302 | -184.3307621 | 3.14626 | 2.44065 |
| 160 | 1.45 | 1.35 | -184.2925957 | -184.3261272 | 3.47916 | 2.56677 |
| 160 | 1.45 | 1.4  | -184.2788287 | -184.3198684 | 3.85376 | 2.73707 |
| 160 | 1.45 | 1.45 | -184.2643367 | -184.3128197 | 4.24809 | 2.92887 |
| 160 | 1.45 | 1.5  | -184.2497127 | -184.3057531 | 4.64601 | 3.12115 |
| 160 | 1.5  | 1    | -184.2306942 | -184.2124189 | 5.1635  | 5.66077 |
| 160 | 1.5  | 1.05 | -184.2705507 | -184.2607246 | 4.079   | 4.34637 |
| 160 | 1.5  | 1.1  | -184.2923048 | -184.2911191 | 3.48708 | 3.51934 |
| 160 | 1.5  | 1.15 | -184.3014545 | -184.3085346 | 3.23811 | 3.04546 |
| 160 | 1.5  | 1.2  | -184.3019603 | -184.3167236 | 3.22435 | 2.82264 |
| 160 | 1.5  | 1.25 | -184.2965641 | -184.3185173 | 3.37118 | 2.77383 |
| 160 | 1.5  | 1.3  | -184.287208  | -184.3160056 | 3.62576 | 2.84218 |
| 160 | 1.5  | 1.35 | -184.2753159 | -184.3107438 | 3.94934 | 2.98535 |
| 160 | 1.5  | 1.4  | -184.2619574 | -184.3038665 | 4.31283 | 3.17248 |
| 160 | 1.5  | 1.5  | -184.2337942 | -184.2890247 | 5.07915 | 3.57633 |
| 165 | 1    | 1    | -184.2660495 | -184.2131707 | 4.20148 | 5.64032 |
| 165 | 1    | 1.05 | -184.314024  | -184.2612719 | 2.8961  | 4.33148 |
| 165 | 1    | 1.1  | -184.3425144 | -184.2902875 | 2.12087 | 3.54197 |
| 165 | 1    | 1.15 | -184.3571977 | -184.3059165 | 1.72134 | 3.1167  |
| 165 | 1    | 1.2  | -184.36231   | -184.3124791 | 1.58223 | 2.93813 |
| 165 | 1    | 1.25 | -184.3609941 | -184.3132636 | 1.61804 | 2.91679 |
| 165 | 1    | 1.3  | -184.3555646 | -184.3108186 | 1.76578 | 2.98332 |
| 165 | 1    | 1.35 | -184.3476935 | -184.3072007 | 1.97995 | 3.08176 |
| 165 | 1    | 1.4  | -184.3385565 | -184.3042333 | 2.22857 | 3.1625  |
| 165 | 1    | 1.45 | -184.3289484 | -184.3043135 | 2.49    | 3.16032 |
| 165 | 1    | 1.5  | -184.3193859 | -184.306343  | 2.7502  | 3.1051  |
| 165 | 1.05 | 1    | -184.304433  | -184.2531665 | 3.15707 | 4.55203 |
| 165 | 1.05 | 1.05 | -184.3512782 | -184.3002151 | 1.88241 | 3.27184 |
| 165 | 1.05 | 1.1  | -184.3787675 | -184.3284435 | 1.13443 | 2.50374 |
| 165 | 1.05 | 1.15 | -184.3925361 | -184.3435466 | 0.75978 | 2.09279 |
| 165 | 1.05 | 1.2  | -184.3967844 | -184.3498526 | 0.64418 | 1.9212  |
| 165 | 1.05 | 1.25 | -184.3946343 | -184.3506914 | 0.70269 | 1.89838 |
| 165 | 1.05 | 1.3  | -184.3883894 | -184.3486782 | 0.87261 | 1.95315 |
| 165 | 1.05 | 1.35 | -184.379722  | -184.3457053 | 1.10845 | 2.03405 |
| 165 | 1.05 | 1.4  | -184.3698193 | -184.3430042 | 1.37791 | 2.10755 |
| 165 | 1.05 | 1.45 | -184.3594905 | -184.3420096 | 1.65895 | 2.13461 |

|     |      |      |              |              |         |         |
|-----|------|------|--------------|--------------|---------|---------|
| 165 | 1.05 | 1.5  | -184.3492677 | -184.3432545 | 1.93712 | 2.10074 |
| 165 | 1.1  | 1    | -184.3234919 | -184.2738809 | 2.63848 | 3.98839 |
| 165 | 1.1  | 1.05 | -184.369335  | -184.3201128 | 1.39108 | 2.73042 |
| 165 | 1.1  | 1.1  | -184.3959419 | -184.3478333 | 0.66711 | 1.97615 |
| 165 | 1.1  | 1.15 | -184.4089058 | -184.3627685 | 0.31436 | 1.56976 |
| 165 | 1.1  | 1.2  | -184.412392  | -184.3693069 | 0.2195  | 1.39185 |
| 165 | 1.1  | 1.25 | -184.4094979 | -184.3699965 | 0.29825 | 1.37308 |
| 165 | 1.1  | 1.3  | -184.4025127 | -184.3684355 | 0.48832 | 1.41556 |
| 165 | 1.1  | 1.35 | -184.3931061 | -184.3658814 | 0.74427 | 1.48506 |
| 165 | 1.1  | 1.4  | -184.3824705 | -184.3633452 | 1.03367 | 1.55407 |
| 165 | 1.1  | 1.45 | -184.3714311 | -184.3617661 | 1.33405 | 1.59703 |
| 165 | 1.1  | 1.5  | -184.3605359 | -184.3619366 | 1.63051 | 1.5924  |
| 165 | 1.15 | 1    | -184.3288976 | -184.2810194 | 2.49139 | 3.79415 |
| 165 | 1.15 | 1.05 | -184.3738357 | -184.3266734 | 1.26862 | 2.55191 |
| 165 | 1.15 | 1.1  | -184.3996536 | -184.3541381 | 0.56612 | 1.80459 |
| 165 | 1.15 | 1.15 | -184.4119039 | -184.3688637 | 0.23278 | 1.40391 |
| 165 | 1.15 | 1.2  | -184.4147175 | -184.3754229 | 0.15623 | 1.22543 |
| 165 | 1.15 | 1.25 | -184.4111647 | -184.3776854 | 0.2529  | 1.16387 |
| 165 | 1.15 | 1.3  | -184.4035158 | -184.3770205 | 0.46102 | 1.18196 |
| 165 | 1.15 | 1.35 | -184.3934334 | -184.3747222 | 0.73537 | 1.2445  |
| 165 | 1.15 | 1.4  | -184.3821123 | -184.3718598 | 1.04341 | 1.32238 |
| 165 | 1.15 | 1.45 | -184.3703889 | -184.3693803 | 1.36241 | 1.38985 |
| 165 | 1.15 | 1.5  | -184.3588274 | -184.3681181 | 1.677   | 1.4242  |
| 165 | 1.2  | 1    | -184.3248939 | -184.2788535 | 2.60033 | 3.85309 |
| 165 | 1.2  | 1.05 | -184.3689955 | -184.3242746 | 1.40032 | 2.61718 |
| 165 | 1.2  | 1.1  | -184.394094  | -184.350917  | 0.71739 | 1.89224 |
| 165 | 1.2  | 1.15 | -184.4057029 | -184.3664632 | 0.40151 | 1.46922 |
| 165 | 1.2  | 1.2  | -184.4079183 | -184.3747588 | 0.34123 | 1.2435  |
| 165 | 1.2  | 1.25 | -184.4037818 | -184.3779048 | 0.45379 | 1.1579  |
| 165 | 1.2  | 1.3  | -184.3955422 | -184.3776269 | 0.67799 | 1.16546 |
| 165 | 1.2  | 1.35 | -184.3848502 | -184.3752599 | 0.96891 | 1.22987 |
| 165 | 1.2  | 1.4  | -184.3728986 | -184.371909  | 1.29412 | 1.32105 |
| 165 | 1.2  | 1.45 | -184.3605307 | -184.3685325 | 1.63065 | 1.41292 |
| 165 | 1.2  | 1.5  | -184.3483246 | -184.365974  | 1.96278 | 1.48254 |
| 165 | 1.25 | 1    | -184.3146463 | -184.2707648 | 2.87916 | 4.07318 |
| 165 | 1.25 | 1.05 | -184.3579576 | -184.3160994 | 1.70066 | 2.83963 |
| 165 | 1.25 | 1.1  | -184.3823868 | -184.3425716 | 1.03594 | 2.11932 |
| 165 | 1.25 | 1.15 | -184.3934093 | -184.3595947 | 0.73602 | 1.65612 |
| 165 | 1.25 | 1.2  | -184.3950867 | -184.3687543 | 0.69038 | 1.40688 |
| 165 | 1.25 | 1.25 | -184.3904307 | -184.3723512 | 0.81707 | 1.30901 |
| 165 | 1.25 | 1.3  | -184.381666  | -184.3721367 | 1.05556 | 1.31485 |
| 165 | 1.25 | 1.35 | -184.3704263 | -184.3695116 | 1.36139 | 1.38628 |
| 165 | 1.25 | 1.4  | -184.3579021 | -184.3656142 | 1.70217 | 1.49233 |
| 165 | 1.25 | 1.45 | -184.3449393 | -184.3613912 | 2.05489 | 1.60723 |
| 165 | 1.25 | 1.5  | -184.3321233 | -184.3576591 | 2.40361 | 1.70879 |
| 165 | 1.3  | 1    | -184.3005015 | -184.2591452 | 3.26404 | 4.38935 |
| 165 | 1.3  | 1.05 | -184.3430533 | -184.3033358 | 2.10621 | 3.18692 |
| 165 | 1.3  | 1.1  | -184.366849  | -184.3317417 | 1.45873 | 2.414   |
| 165 | 1.3  | 1.15 | -184.3773264 | -184.3496815 | 1.17364 | 1.92586 |
| 165 | 1.3  | 1.2  | -184.3785131 | -184.3593254 | 1.14135 | 1.66344 |
| 165 | 1.3  | 1.25 | -184.3733905 | -184.3630201 | 1.28073 | 1.56291 |
| 165 | 1.3  | 1.3  | -184.3641575 | -184.3626247 | 1.53196 | 1.57367 |
| 165 | 1.3  | 1.35 | -184.3524294 | -184.3596153 | 1.85109 | 1.65556 |
| 165 | 1.3  | 1.4  | -184.3393865 | -184.3551463 | 2.20598 | 1.77716 |
| 165 | 1.3  | 1.45 | -184.3258783 | -184.3501443 | 2.57354 | 1.91326 |
| 165 | 1.3  | 1.5  | -184.3124953 | -184.3453779 | 2.93769 | 2.04296 |
| 165 | 1.35 | 1    | -184.2841808 | -184.2429831 | 3.70813 | 4.82912 |
| 165 | 1.35 | 1.05 | -184.3259939 | -184.2896176 | 2.5704  | 3.56019 |
| 165 | 1.35 | 1.1  | -184.3491814 | -184.3196238 | 1.93946 | 2.74373 |
| 165 | 1.35 | 1.15 | -184.359146  | -184.338047  | 1.66833 | 2.24243 |
| 165 | 1.35 | 1.2  | -184.3598821 | -184.3477683 | 1.6483  | 1.97791 |
| 165 | 1.35 | 1.25 | -184.3543401 | -184.351275  | 1.79909 | 1.8825  |
| 165 | 1.35 | 1.3  | -184.3446901 | -184.3505323 | 2.06167 | 1.90271 |
| 165 | 1.35 | 1.35 | -184.3325244 | -184.3470573 | 2.3927  | 1.99726 |
| 165 | 1.35 | 1.4  | -184.3190128 | -184.3420127 | 2.76035 | 2.13452 |
| 165 | 1.35 | 1.45 | -184.3050055 | -184.3362951 | 3.14149 | 2.2901  |
| 165 | 1.35 | 1.5  | -184.2911003 | -184.3306233 | 3.51985 | 2.44443 |
| 165 | 1.4  | 1    | -184.2669182 | -184.229008  | 4.17785 | 5.20938 |
| 165 | 1.4  | 1.05 | -184.3080082 | -184.275899  | 3.05979 | 3.93348 |
| 165 | 1.4  | 1.1  | -184.3306089 | -184.3070532 | 2.44482 | 3.08577 |
| 165 | 1.4  | 1.15 | -184.3400932 | -184.3255093 | 2.18675 | 2.58358 |
| 165 | 1.4  | 1.2  | -184.3404359 | -184.3349878 | 2.17743 | 2.32567 |
| 165 | 1.4  | 1.25 | -184.3345593 | -184.338105  | 2.33733 | 2.24085 |



|     |      |      |              |              |         |         |
|-----|------|------|--------------|--------------|---------|---------|
| 165 | 1.4  | 1.3  | -184.3245891 | -184.3368933 | 2.60862 | 2.27382 |
| 165 | 1.4  | 1.35 | -184.3120664 | -184.3328982 | 2.94936 | 2.38253 |
| 165 | 1.4  | 1.4  | -184.2981302 | -184.327279  | 3.32857 | 2.53543 |
| 165 | 1.4  | 1.45 | -184.2836403 | -184.3209051 | 3.72284 | 2.70886 |
| 165 | 1.4  | 1.5  | -184.2692224 | -184.3144423 | 4.11515 | 2.88471 |
| 165 | 1.45 | 1    | -184.2495698 | -184.216005  | 4.6499  | 5.56319 |
| 165 | 1.45 | 1.05 | -184.289948  | -184.2627875 | 3.5512  | 4.29024 |
| 165 | 1.45 | 1.1  | -184.3119778 | -184.2945548 | 2.95177 | 3.42585 |
| 165 | 1.45 | 1.15 | -184.321037  | -184.3126866 | 2.70527 | 2.93249 |
| 165 | 1.45 | 1.2  | -184.3211455 | -184.3216852 | 2.70232 | 2.68763 |
| 165 | 1.45 | 1.25 | -184.3152157 | -184.3242661 | 2.86367 | 2.61741 |
| 165 | 1.45 | 1.3  | -184.3052748 | -184.322497  | 3.13416 | 2.66554 |
| 165 | 1.45 | 1.35 | -184.2927693 | -184.3179357 | 3.47444 | 2.78966 |
| 165 | 1.45 | 1.4  | -184.2787629 | -184.3117351 | 3.85555 | 2.95838 |
| 165 | 1.45 | 1.45 | -184.2640515 | -184.3047428 | 4.25585 | 3.14864 |
| 165 | 1.45 | 1.5  | -184.2492553 | -184.2975825 | 4.65845 | 3.34347 |
| 165 | 1.5  | 1    | -184.2326972 | -184.2043183 | 5.109   | 5.88119 |
| 165 | 1.5  | 1.05 | -184.2723718 | -184.2521454 | 4.02945 | 4.57981 |
| 165 | 1.5  | 1.1  | -184.2938251 | -184.2825097 | 3.44571 | 3.7536  |
| 165 | 1.5  | 1.15 | -184.3025331 | -184.3000624 | 3.20876 | 3.27599 |
| 165 | 1.5  | 1.2  | -184.3026127 | -184.3084254 | 3.2066  | 3.04843 |
| 165 | 1.5  | 1.25 | -184.2968801 | -184.3103707 | 3.36258 | 2.9955  |
| 165 | 1.5  | 1.3  | -184.2872598 | -184.3079843 | 3.62435 | 3.06044 |
| 165 | 1.5  | 1.35 | -184.2751359 | -184.3028207 | 3.95424 | 3.20094 |
| 165 | 1.5  | 1.4  | -184.2615659 | -184.296024  | 4.32348 | 3.38588 |
| 165 | 1.5  | 1.45 | -184.2473379 | -184.2884279 | 4.71062 | 3.59257 |
| 165 | 1.5  | 1.5  | -184.2330231 | -184.2806283 | 5.10013 | 3.80479 |
| 170 | 1    | 1    | -184.2720103 | -184.2184295 | 4.03929 | 5.49722 |
| 170 | 1    | 1.05 | -184.3194109 | -184.2656552 | 2.74952 | 4.21221 |
| 170 | 1    | 1.1  | -184.3473628 | -184.2937456 | 1.98895 | 3.44787 |
| 170 | 1    | 1.15 | -184.3615457 | -184.3083793 | 1.60303 | 3.04969 |
| 170 | 1    | 1.2  | -184.3661921 | -184.3138526 | 1.4766  | 2.90076 |
| 170 | 1    | 1.25 | -184.3644488 | -184.3134129 | 1.52404 | 2.91273 |
| 170 | 1    | 1.3  | -184.3586263 | -184.3095591 | 1.68247 | 3.01759 |
| 170 | 1    | 1.35 | -184.3503967 | -184.3043132 | 1.90639 | 3.16033 |
| 170 | 1    | 1.4  | -184.3409345 | -184.2994623 | 2.16386 | 3.29232 |
| 170 | 1    | 1.45 | -184.3310352 | -184.2967203 | 2.43322 | 3.36693 |
| 170 | 1    | 1.5  | -184.3212125 | -184.3007848 | 2.7005  | 3.25634 |
| 170 | 1    | 1.6  | -            | -184.3121611 | -       | 2.94679 |
| 170 | 1    | 1.7  | -            | -184.3267655 | -       | 2.5494  |
| 170 | 1    | 1.8  | -            | -184.3395295 | -       | 2.20209 |
| 170 | 1    | 1.9  | -            | -184.3495317 | -       | 1.92993 |
| 170 | 1    | 2    | -            | -184.3569843 | -       | 1.72715 |
| 170 | 1    | 2.1  | -            | -184.362353  | -       | 1.58106 |
| 170 | 1    | 2.2  | -            | -184.3661149 | -       | 1.4787  |
| 170 | 1    | 2.3  | -            | -184.3686814 | -       | 1.40887 |
| 170 | 1    | 2.4  | -            | -184.3703822 | -       | 1.36259 |
| 170 | 1    | 2.5  | -            | -184.3714724 | -       | 1.33293 |
| 170 | 1    | 2.6  | -            | -184.3721423 | -       | 1.3147  |
| 170 | 1    | 2.7  | -            | -184.3725309 | -       | 1.30412 |
| 170 | 1    | 2.8  | -            | -184.3727357 | -       | 1.29855 |
| 170 | 1    | 2.9  | -            | -184.3728216 | -       | 1.29621 |
| 170 | 1    | 3    | -            | -184.372833  | -       | 1.2959  |
| 170 | 1.05 | 1    | -184.309796  | -184.2575574 | 3.01114 | 4.43255 |
| 170 | 1.05 | 1.05 | -184.3561292 | -184.3036653 | 1.75041 | 3.17796 |
| 170 | 1.05 | 1.1  | -184.3831399 | -184.3308538 | 1.01545 | 2.43816 |
| 170 | 1.05 | 1.15 | -184.3964649 | -184.3447738 | 0.65288 | 2.05939 |
| 170 | 1.05 | 1.2  | -184.4003028 | -184.3496995 | 0.54845 | 1.92537 |
| 170 | 1.05 | 1.25 | -184.3977755 | -184.3489114 | 0.61722 | 1.94681 |
| 170 | 1.05 | 1.3  | -184.391184  | -184.3449589 | 0.79657 | 2.05436 |
| 170 | 1.05 | 1.35 | -184.3822004 | -184.3399072 | 1.04102 | 2.19182 |
| 170 | 1.05 | 1.4  | -184.3720084 | -184.3355891 | 1.31834 | 2.30931 |
| 170 | 1.05 | 1.45 | -184.3614199 | -184.3348213 | 1.60645 | 2.3302  |
| 170 | 1.05 | 1.5  | -184.3509633 | -184.3365231 | 1.89098 | 2.2839  |
| 170 | 1.05 | 1.6  | -            | -184.3463997 | -       | 2.01515 |
| 170 | 1.05 | 1.7  | -            | -184.3594296 | -       | 1.66061 |
| 170 | 1.05 | 1.8  | -            | -184.3710013 | -       | 1.34575 |
| 170 | 1.05 | 1.9  | -            | -184.3801344 | -       | 1.09723 |
| 170 | 1.05 | 2    | -            | -184.3869575 | -       | 0.91157 |
| 170 | 1.05 | 2.1  | -            | -184.3918678 | -       | 0.77797 |
| 170 | 1.05 | 2.2  | -            | -184.3952916 | -       | 0.6848  |
| 170 | 1.05 | 2.3  | -            | -184.3976052 | -       | 0.62185 |
| 170 | 1.05 | 2.4  | -            | -184.3991145 | -       | 0.58078 |

|     |      |      |              |              |         |         |
|-----|------|------|--------------|--------------|---------|---------|
| 170 | 1.05 | 2.5  | -            | -184.4000574 | -       | 0.55513 |
| 170 | 1.05 | 2.6  | -            | -184.4006125 | -       | 0.54002 |
| 170 | 1.05 | 2.7  | -            | -184.4009102 | -       | 0.53192 |
| 170 | 1.05 | 2.8  | -            | -184.4010405 | -       | 0.52838 |
| 170 | 1.05 | 2.9  | -            | -184.4010647 | -       | 0.52772 |
| 170 | 1.05 | 3    | -            | -184.4010236 | -       | 0.52884 |
| 170 | 1.1  | 1    | -184.3282726 | -184.2773684 | 2.50839 | 3.8935  |
| 170 | 1.1  | 1.05 | -184.3736632 | -184.3225446 | 1.27331 | 2.66425 |
| 170 | 1.1  | 1.1  | -184.3998486 | -184.3490263 | 0.56081 | 1.94368 |
| 170 | 1.1  | 1.15 | -184.4124227 | -184.3624708 | 0.21867 | 1.57786 |
| 170 | 1.1  | 1.2  | -184.4155499 | -184.3671714 | 0.13358 | 1.44996 |
| 170 | 1.1  | 1.25 | -184.4123254 | -184.366482  | 0.22131 | 1.46871 |
| 170 | 1.1  | 1.3  | -184.4050365 | -184.3618846 | 0.41965 | 1.59381 |
| 170 | 1.1  | 1.35 | -184.3953527 | -184.3576647 | 0.68314 | 1.70863 |
| 170 | 1.1  | 1.4  | -184.3844641 | -184.3541957 | 0.97942 | 1.80302 |
| 170 | 1.1  | 1.45 | -184.373195  | -184.3524383 | 1.28605 | 1.85084 |
| 170 | 1.1  | 1.5  | -184.3620902 | -184.3536113 | 1.58821 | 1.81893 |
| 170 | 1.1  | 1.6  | -            | -184.3621676 | -       | 1.58611 |
| 170 | 1.1  | 1.7  | -            | -184.3734146 | -       | 1.28008 |
| 170 | 1.1  | 1.8  | -            | -184.3836922 | -       | 1.00043 |
| 170 | 1.1  | 1.9  | -            | -184.3918755 | -       | 0.77776 |
| 170 | 1.1  | 2    | -            | -184.3980034 | -       | 0.61102 |
| 170 | 1.1  | 2.1  | -            | -184.4024031 | -       | 0.4913  |
| 170 | 1.1  | 2.2  | -            | -184.4054489 | -       | 0.40843 |
| 170 | 1.1  | 2.3  | -            | -184.4074797 | -       | 0.35317 |
| 170 | 1.1  | 2.4  | -            | -184.4087749 | -       | 0.31792 |
| 170 | 1.1  | 2.5  | -            | -184.4095538 | -       | 0.29673 |
| 170 | 1.1  | 2.6  | -            | -184.4099815 | -       | 0.28509 |
| 170 | 1.1  | 2.7  | -            | -184.4101781 | -       | 0.27974 |
| 170 | 1.1  | 2.8  | -            | -184.4102268 | -       | 0.27842 |
| 170 | 1.1  | 2.9  | -            | -184.4101836 | -       | 0.27959 |
| 170 | 1.1  | 3    | -            | -184.4100862 | -       | 0.28224 |
| 170 | 1.15 | 1    | -184.3331195 | -184.283553  | 2.37651 | 3.72521 |
| 170 | 1.15 | 1.05 | -184.3776619 | -184.327966  | 1.16451 | 2.51674 |
| 170 | 1.15 | 1.1  | -184.4031118 | -184.3538739 | 0.47202 | 1.81178 |
| 170 | 1.15 | 1.15 | -184.4150222 | -184.3671612 | 0.14794 | 1.45023 |
| 170 | 1.15 | 1.2  | -184.4175226 | -184.3701508 | 0.0799  | 1.36889 |
| 170 | 1.15 | 1.25 | -184.4136818 | -184.3702983 | 0.18441 | 1.36487 |
| 170 | 1.15 | 1.3  | -184.4057692 | -184.3682578 | 0.39971 | 1.4204  |
| 170 | 1.15 | 1.35 | -184.3954447 | -184.3650342 | 0.68064 | 1.50811 |
| 170 | 1.15 | 1.4  | -184.3839035 | -184.3616264 | 0.99468 | 1.60084 |
| 170 | 1.15 | 1.45 | -184.3719798 | -184.3590568 | 1.31912 | 1.67075 |
| 170 | 1.15 | 1.5  | -184.3602366 | -184.3584188 | 1.63865 | 1.68811 |
| 170 | 1.15 | 1.6  | -            | -184.3646548 | -       | 1.51843 |
| 170 | 1.15 | 1.7  | -            | -184.3739623 | -       | 1.26518 |
| 170 | 1.15 | 1.8  | -            | -184.3829184 | -       | 1.02148 |
| 170 | 1.15 | 1.9  | -            | -184.3901268 | -       | 0.82534 |
| 170 | 1.15 | 2    | -            | -184.3955352 | -       | 0.67818 |
| 170 | 1.15 | 2.1  | -            | -184.3994051 | -       | 0.57288 |
| 170 | 1.15 | 2.2  | -            | -184.4020596 | -       | 0.50065 |
| 170 | 1.15 | 2.3  | -            | -184.4038001 | -       | 0.45329 |
| 170 | 1.15 | 2.4  | -            | -184.4048781 | -       | 0.42396 |
| 170 | 1.15 | 2.5  | -            | -184.4054919 | -       | 0.40725 |
| 170 | 1.15 | 2.6  | -            | -184.4057918 | -       | 0.3991  |
| 170 | 1.15 | 2.7  | -            | -184.4058865 | -       | 0.39652 |
| 170 | 1.15 | 2.8  | -            | -184.4058523 | -       | 0.39745 |
| 170 | 1.15 | 2.9  | -            | -184.40574   | -       | 0.4005  |
| 170 | 1.15 | 3    | -            | -184.4055836 | -       | 0.40476 |
| 170 | 1.2  | 1    | -184.3285872 | -184.2800865 | 2.49983 | 3.81954 |
| 170 | 1.2  | 1.05 | -184.3723463 | -184.3242196 | 1.30915 | 2.61867 |
| 170 | 1.2  | 1.1  | -184.3971257 | -184.3499897 | 0.6349  | 1.91747 |
| 170 | 1.2  | 1.15 | -184.4084394 | -184.3630508 | 0.32705 | 1.56208 |
| 170 | 1.2  | 1.2  | -184.4103828 | -184.3671911 | 0.27417 | 1.44942 |
| 170 | 1.2  | 1.25 | -184.4059961 | -184.3690897 | 0.39353 | 1.39776 |
| 170 | 1.2  | 1.3  | -184.3975273 | -184.3680432 | 0.62397 | 1.42623 |
| 170 | 1.2  | 1.35 | -184.3866244 | -184.365175  | 0.92064 | 1.50428 |
| 170 | 1.2  | 1.4  | -184.3744826 | -184.3614781 | 1.25102 | 1.60487 |
| 170 | 1.2  | 1.45 | -184.361942  | -184.3579693 | 1.59225 | 1.70035 |
| 170 | 1.2  | 1.5  | -184.3495789 | -184.3557469 | 1.92865 | 1.76082 |
| 170 | 1.2  | 1.6  | -            | -184.3573172 | -       | 1.71809 |
| 170 | 1.2  | 1.7  | -            | -184.3648064 | -       | 1.51431 |
| 170 | 1.2  | 1.8  | -            | -184.3723745 | -       | 1.30838 |
| 170 | 1.2  | 1.9  | -            | -184.3785009 | -       | 1.14168 |

|     |      |      |              |              |         |         |
|-----|------|------|--------------|--------------|---------|---------|
| 170 | 1.2  | 2    | -            | -184.3830687 | -       | 1.01739 |
| 170 | 1.2  | 2.1  | -            | -184.3878961 | -       | 0.88604 |
| 170 | 1.2  | 2.2  | -            | -184.3900698 | -       | 0.82689 |
| 170 | 1.2  | 2.3  | -            | -184.3898068 | -       | 0.83405 |
| 170 | 1.2  | 2.4  | -            | -184.3922366 | -       | 0.76793 |
| 170 | 1.2  | 2.5  | -            | -184.3926311 | -       | 0.7572  |
| 170 | 1.2  | 2.6  | -            | -184.3927602 | -       | 0.75368 |
| 170 | 1.2  | 2.7  | -            | -184.3910459 | -       | 0.80033 |
| 170 | 1.2  | 2.8  | -            | -184.3908973 | -       | 0.80438 |
| 170 | 1.2  | 2.9  | -            | -184.3923835 | -       | 0.76393 |
| 170 | 1.2  | 3    | -            | -184.3904604 | -       | 0.81626 |
| 170 | 1.25 | 1    | -184.3178453 | -184.2711083 | 2.79212 | 4.06383 |
| 170 | 1.25 | 1.05 | -184.3608627 | -184.3145583 | 1.62162 | 2.88156 |
| 170 | 1.25 | 1.1  | -184.385017  | -184.3372238 | 0.96438 | 2.26483 |
| 170 | 1.25 | 1.15 | -184.3957838 | -184.3528979 | 0.67141 | 1.83834 |
| 170 | 1.25 | 1.2  | -184.3972248 | -184.3601125 | 0.6322  | 1.64203 |
| 170 | 1.25 | 1.25 | -184.3923512 | -184.3630791 | 0.76481 | 1.56131 |
| 170 | 1.25 | 1.3  | -184.3833873 | -184.3625225 | 1.00872 | 1.57645 |
| 170 | 1.25 | 1.35 | -184.3719661 | -184.3596316 | 1.31949 | 1.65511 |
| 170 | 1.25 | 1.4  | -184.3592765 | -184.3554851 | 1.66478 | 1.76794 |
| 170 | 1.25 | 1.45 | -184.3461641 | -184.3510895 | 2.02156 | 1.88754 |
| 170 | 1.25 | 1.5  | -184.3332134 | -184.3474593 | 2.37395 | 1.98632 |
| 170 | 1.3  | 1    | -184.3032436 | -184.2581225 | 3.18943 | 4.41718 |
| 170 | 1.3  | 1.05 | -184.3455456 | -184.3013575 | 2.03839 | 3.24075 |
| 170 | 1.3  | 1.1  | -184.3691046 | -184.3247614 | 1.39735 | 2.60393 |
| 170 | 1.3  | 1.15 | -184.3793599 | -184.3406941 | 1.11831 | 2.1704  |
| 170 | 1.3  | 1.2  | -184.38034   | -184.3502942 | 1.09164 | 1.90919 |
| 170 | 1.3  | 1.25 | -184.3750267 | -184.3537903 | 1.23621 | 1.81406 |
| 170 | 1.3  | 1.3  | -184.3656192 | -184.3532808 | 1.49219 | 1.82792 |
| 170 | 1.3  | 1.35 | -184.3537328 | -184.3501257 | 1.81562 | 1.91377 |
| 170 | 1.3  | 1.4  | -184.3405475 | -184.3454647 | 2.17439 | 2.0406  |
| 170 | 1.3  | 1.45 | -184.3269113 | -184.3402678 | 2.54543 | 2.182   |
| 170 | 1.3  | 1.5  | -184.3134146 | -184.335437  | 2.91268 | 2.31345 |
| 170 | 1.35 | 1    | -184.2865061 | -184.2432657 | 3.64486 | 4.82143 |
| 170 | 1.35 | 1.05 | -184.3281082 | -184.282997  | 2.51287 | 3.74034 |
| 170 | 1.35 | 1.1  | -184.3510913 | -184.3114359 | 1.8875  | 2.96652 |
| 170 | 1.35 | 1.15 | -184.3608594 | -184.3277911 | 1.62171 | 2.52149 |
| 170 | 1.35 | 1.2  | -184.3614094 | -184.3387473 | 1.60674 | 2.22338 |
| 170 | 1.35 | 1.25 | -184.3556938 | -184.342275  | 1.76226 | 2.12739 |
| 170 | 1.35 | 1.3  | -184.3458857 | -184.3415278 | 2.02914 | 2.14772 |
| 170 | 1.35 | 1.35 | -184.3335798 | -184.3379749 | 2.36398 | 2.24439 |
| 170 | 1.35 | 1.4  | -184.3199457 | -184.3327818 | 2.73497 | 2.3857  |
| 170 | 1.35 | 1.45 | -184.3058319 | -184.3268818 | 3.119   | 2.54624 |
| 170 | 1.35 | 1.5  | -184.291833  | -184.3210652 | 3.49991 | 2.70451 |
| 170 | 1.4  | 1    | -184.2688703 | -184.2279484 | 4.12473 | 5.23821 |
| 170 | 1.4  | 1.05 | -184.3097833 | -184.2685553 | 3.01149 | 4.1333  |
| 170 | 1.4  | 1.1  | -184.3322034 | -184.2982369 | 2.40143 | 3.32566 |
| 170 | 1.4  | 1.15 | -184.3415022 | -184.3148185 | 2.14841 | 2.87448 |
| 170 | 1.4  | 1.2  | -184.3416492 | -184.3261288 | 2.14442 | 2.56672 |
| 170 | 1.4  | 1.25 | -184.3355705 | -184.3293688 | 2.30982 | 2.47857 |
| 170 | 1.4  | 1.3  | -184.32541   | -184.3282157 | 2.58628 | 2.50994 |
| 170 | 1.4  | 1.35 | -184.312732  | -184.324193  | 2.93125 | 2.6194  |
| 170 | 1.4  | 1.4  | -184.298688  | -184.3184668 | 3.31339 | 2.77521 |
| 170 | 1.4  | 1.45 | -184.2841308 | -184.311935  | 3.70949 | 2.95294 |
| 170 | 1.4  | 1.5  | -184.2696666 | -184.3053105 | 4.10306 | 3.13319 |
| 170 | 1.45 | 1    | -184.2511958 | -184.2133186 | 4.60565 | 5.63629 |
| 170 | 1.45 | 1.05 | -184.2914296 | -184.2551648 | 3.51089 | 4.49766 |
| 170 | 1.45 | 1.1  | -184.3132961 | -184.2855262 | 2.9159  | 3.67152 |
| 170 | 1.45 | 1.15 | -184.3221436 | -184.3019956 | 2.67516 | 3.22339 |
| 170 | 1.45 | 1.2  | -184.3219549 | -184.3130227 | 2.6803  | 2.92334 |
| 170 | 1.45 | 1.25 | -184.3157136 | -184.3157837 | 2.85012 | 2.84822 |
| 170 | 1.45 | 1.3  | -184.3055141 | -184.3141118 | 3.12765 | 2.89371 |
| 170 | 1.45 | 1.35 | -184.2927902 | -184.3095614 | 3.47387 | 3.01752 |
| 170 | 1.45 | 1.4  | -184.2785873 | -184.3032954 | 3.86033 | 3.18802 |
| 170 | 1.45 | 1.45 | -184.2637096 | -184.2961822 | 4.26515 | 3.38157 |
| 170 | 1.45 | 1.5  | -184.2487844 | -184.2888756 | 4.67127 | 3.58038 |
| 170 | 1.5  | 1    | -184.2340469 | -            | 5.07227 | -       |
| 170 | 1.5  | 1.05 | -184.2736151 | -            | 3.99562 | -       |
| 170 | 1.5  | 1.1  | -184.2949289 | -            | 3.41567 | -       |
| 170 | 1.5  | 1.15 | -184.303336  | -            | 3.18692 | -       |
| 170 | 1.5  | 1.2  | -184.3030333 | -            | 3.19515 | -       |
| 170 | 1.5  | 1.25 | -184.2970081 | -            | 3.3591  | -       |
| 170 | 1.5  | 1.3  | -184.2871633 | -            | 3.62698 | -       |

|     |      |      |              |              |         |         |
|-----|------|------|--------------|--------------|---------|---------|
| 170 | 1.5  | 1.35 | -184.2748622 | -            | 3.96169 | -       |
| 170 | 1.5  | 1.5  | -184.2323167 | -184.2723303 | 5.11935 | 4.03058 |
| 175 | 1    | 1    | -184.275546  | -184.2216091 | 3.94308 | 5.41071 |
| 175 | 1    | 1.05 | -184.3226055 | -184.2683332 | 2.6626  | 4.13934 |
| 175 | 1    | 1.1  | -184.3502378 | -            | 1.91072 | -       |
| 175 | 1    | 1.15 | -184.3641233 | -            | 1.53289 | -       |
| 175 | 1    | 1.2  | -184.3684959 | -            | 1.41392 | -       |
| 175 | 1.05 | 1    | -184.3129735 | -184.2602345 | 2.92468 | 4.35971 |
| 175 | 1.05 | 1.05 | -184.3590019 | -184.3058106 | 1.67225 | 3.11958 |
| 175 | 1.05 | 1.1  | -184.3857286 | -            | 0.94502 | -       |
| 175 | 1.05 | 1.15 | -184.3987907 | -            | 0.58959 | -       |
| 175 | 1.05 | 1.2  | -184.4023867 | -            | 0.49175 | -       |
| 175 | 1.05 | 1.25 | -184.3996362 | -            | 0.56659 | -       |
| 175 | 1.05 | 1.3  | -184.3928409 | -            | 0.75149 | -       |
| 175 | 1.1  | 1    | -184.331101  | -184.2795287 | 2.43143 | 3.83471 |
| 175 | 1.1  | 1.05 | -184.3762222 | -184.3241175 | 1.20368 | 2.62145 |
| 175 | 1.1  | 1.1  | -184.4021576 | -            | 0.49798 | -       |
| 175 | 1.1  | 1.15 | -184.4145014 | -            | 0.16211 | -       |
| 175 | 1.1  | 1.2  | -184.4174166 | -            | 0.08278 | -       |
| 175 | 1.1  | 1.25 | -184.4139979 | -            | 0.17581 | -       |
| 175 | 1.1  | 1.3  | -184.4065312 | -            | 0.37898 | -       |
| 175 | 1.15 | 1    | -184.3356133 | -184.2851767 | 2.30865 | 3.68103 |
| 175 | 1.15 | 1.05 | -184.3799203 | -184.3289085 | 1.10306 | 2.49109 |
| 175 | 1.15 | 1.1  | -184.4051522 | -            | 0.4165  | -       |
| 175 | 1.15 | 1.15 | -184.4168621 | -            | 0.09787 | -       |
| 175 | 1.15 | 1.2  | -184.4191783 | -            | 0.03485 | -       |
| 175 | 1.15 | 1.25 | -184.4151685 | -            | 0.14395 | -       |
| 175 | 1.15 | 1.3  | -184.4071007 | -            | 0.36348 | -       |
| 175 | 1.2  | 1    | -184.3307647 | -184.2812899 | 2.44058 | 3.78679 |
| 175 | 1.2  | 1.05 | -184.3743205 | -184.3244313 | 1.25543 | 2.61291 |
| 175 | 1.2  | 1.1  | -184.3989114 | -            | 0.58631 | -       |
| 175 | 1.2  | 1.15 | -184.4100513 | -            | 0.28319 | -       |
| 175 | 1.2  | 1.2  | -184.4118349 | -            | 0.23466 | -       |
| 175 | 1.2  | 1.25 | -184.4073016 | -            | 0.35801 | -       |
| 175 | 1.2  | 1.3  | -184.3986986 | -            | 0.5921  | -       |
| 175 | 1.25 | 1    | -184.3197274 | -184.2698837 | 2.74091 | 4.09716 |
| 175 | 1.25 | 1.05 | -184.3625712 | -184.313876  | 1.57513 | 2.90012 |
| 175 | 1.25 | 1.1  | -184.3865634 | -            | 0.9223  | -       |
| 175 | 1.25 | 1.15 | -184.3971799 | -            | 0.63343 | -       |
| 175 | 1.25 | 1.2  | -184.3984826 | -            | 0.59798 | -       |
| 175 | 1.25 | 1.25 | -184.3934817 | -            | 0.73405 | -       |
| 175 | 1.25 | 1.3  | -184.3844013 | -            | 0.98113 | -       |
| 175 | 1.3  | 1    | -184.3048529 | -184.254659  | 3.14564 | 4.51142 |
| 175 | 1.3  | 1.05 | -184.3470079 | -184.2996329 | 1.99861 | 3.28768 |
| 175 | 1.3  | 1.1  | -184.3704282 | -            | 1.36134 | -       |
| 175 | 1.3  | 1.15 | -184.380554  | -            | 1.08582 | -       |
| 175 | 1.3  | 1.2  | -184.3814136 | -            | 1.06242 | -       |
| 175 | 1.3  | 1.25 | -184.3759893 | -            | 1.21002 | -       |
| 175 | 1.3  | 1.3  | -184.3664803 | -            | 1.46876 | -       |
| 175 | 1.35 | 1    | -184.2878668 | -184.2375387 | 3.60783 | 4.97726 |
| 175 | 1.35 | 1.05 | -184.3293445 | -184.2835153 | 2.47923 | 3.72624 |
| 175 | 1.35 | 1.1  | -184.3522097 | -            | 1.85706 | -       |
| 175 | 1.35 | 1.15 | -184.3618655 | -            | 1.59433 | -       |
| 175 | 1.35 | 1.2  | -184.3623093 | -            | 1.58225 | -       |
| 175 | 1.35 | 1.25 | -184.3564953 | -            | 1.74045 | -       |
| 175 | 1.35 | 1.3  | -184.3465969 | -            | 2.00979 | -       |
| 175 | 1.4  | 1    | -184.2700081 | -184.2199208 | 4.09377 | 5.45665 |
| 175 | 1.4  | 1.05 | -184.3108175 | -            | 2.98334 | -       |
| 175 | 1.4  | 1.1  | -184.3331354 | -            | 2.37607 | -       |
| 175 | 1.4  | 1.15 | -184.3423346 | -            | 2.12576 | -       |
| 175 | 1.4  | 1.2  | -184.3423813 | -            | 2.12449 | -       |
| 175 | 1.4  | 1.25 | -184.3362032 | -            | 2.2926  | -       |
| 175 | 1.4  | 1.3  | -184.3259482 | -            | 2.57164 | -       |
| 175 | 1.45 | 1    | -184.2521369 | -184.2028166 | 4.58004 | 5.92205 |
| 175 | 1.45 | 1.05 | -184.2922861 | -            | 3.48758 | -       |
| 175 | 1.45 | 1.1  | -184.3140652 | -            | 2.89497 | -       |
| 175 | 1.45 | 1.15 | -184.3228164 | -            | 2.65685 | -       |
| 175 | 1.45 | 1.2  | -184.3224839 | -            | 2.6659  | -       |
| 175 | 1.45 | 1.25 | -184.316009  | -            | 2.84208 | -       |
| 175 | 1.5  | 1    | -184.2348192 | -184.1871756 | 5.05126 | 6.34764 |
| 175 | 1.5  | 1.05 | -184.2743228 | -            | 3.97637 | -       |
| 175 | 1.5  | 1.1  | -184.2955745 | -            | 3.39811 | -       |
| 175 | 1.5  | 1.15 | -184.303881  | -            | 3.17209 | -       |

|     |      |      |              |              |         |         |
|-----|------|------|--------------|--------------|---------|---------|
| 180 | 0.9  | 0.9  | -183.9197759 | -183.8642765 | 13.6236 | 15.1337 |
| 180 | 0.9  | 0.95 | -184.0344313 | -183.9783593 | 10.5038 | 12.0295 |
| 180 | 0.9  | 1    | -184.1112974 | -184.0549784 | 8.41229 | 9.94473 |
| 180 | 0.9  | 1.05 | -184.1607366 | -            | 7.06705 | -       |
| 180 | 0.9  | 1.1  | -184.1904604 | -            | 6.25826 | -       |
| 180 | 0.9  | 1.15 | -184.2062311 | -            | 5.82914 | -       |
| 180 | 0.9  | 1.2  | -184.2123475 | -            | 5.66271 | -       |
| 180 | 0.9  | 1.25 | -184.2119946 | -            | 5.67232 | -       |
| 180 | 0.9  | 1.3  | -184.2074991 | -            | 5.79464 | -       |
| 180 | 0.9  | 1.35 | -184.2005266 | -            | 5.98436 | -       |
| 180 | 0.9  | 1.4  | -184.1922308 | -            | 6.21009 | -       |
| 180 | 0.9  | 1.45 | -184.1833837 | -            | 6.45082 | -       |
| 180 | 0.9  | 1.5  | -184.1744764 | -            | 6.69319 | -       |
| 180 | 0.9  | 1.55 | -184.1658171 | -            | 6.92881 | -       |
| 180 | 0.9  | 1.6  | -184.1575939 | -            | 7.15256 | -       |
| 180 | 0.9  | 1.65 | -184.1499223 | -            | 7.3613  | -       |
| 180 | 0.9  | 1.7  | -184.142873  | -            | 7.55311 | -       |
| 180 | 0.9  | 1.75 | -184.1364858 | -            | 7.72691 | -       |
| 180 | 0.9  | 1.8  | -184.1307766 | -            | 7.88226 | -       |
| 180 | 0.9  | 1.85 | -184.1257405 | -            | 8.01929 | -       |
| 180 | 0.9  | 1.9  | -184.1213549 | -            | 8.13862 | -       |
| 180 | 0.9  | 1.95 | -184.1175823 | -            | 8.24127 | -       |
| 180 | 0.9  | 2    | -184.1143736 | -            | 8.32858 | -       |
| 180 | 0.95 | 0.9  | -184.0242926 | -183.9704168 | 10.7797 | 12.2456 |
| 180 | 0.95 | 0.95 | -184.1371844 | -184.0824624 | 7.7079  | 9.19689 |
| 180 | 0.95 | 1    | -184.2125258 | -184.1573185 | 5.65786 | 7.16005 |
| 180 | 0.95 | 1.05 | -184.2606385 | -            | 4.34872 | -       |
| 180 | 0.95 | 1.1  | -184.2891926 | -            | 3.57176 | -       |
| 180 | 0.95 | 1.15 | -184.3039108 | -            | 3.17128 | -       |
| 180 | 0.95 | 1.2  | -184.3090608 | -            | 3.03115 | -       |
| 180 | 0.95 | 1.25 | -184.3078073 | -            | 3.06525 | -       |
| 180 | 0.95 | 1.3  | -184.3024709 | -            | 3.21046 | -       |
| 180 | 0.95 | 1.35 | -184.2947198 | -            | 3.42136 | -       |
| 180 | 0.95 | 1.4  | -184.2857157 | -            | 3.66637 | -       |
| 180 | 0.95 | 1.45 | -184.2762439 | -            | 3.92409 | -       |
| 180 | 0.95 | 1.5  | -184.2668004 | -            | 4.18105 | -       |
| 180 | 0.95 | 1.55 | -184.2576969 | -            | 4.42876 | -       |
| 180 | 0.95 | 1.6  | -184.2491201 | -            | 4.66213 | -       |
| 180 | 0.95 | 1.65 | -184.2411804 | -            | 4.87817 | -       |
| 180 | 0.95 | 1.7  | -184.2339405 | -            | 5.07517 | -       |
| 180 | 0.95 | 1.75 | -184.2274305 | -            | 5.25231 | -       |
| 180 | 0.95 | 1.8  | -184.2216551 | -            | 5.40945 | -       |
| 180 | 0.95 | 1.85 | -184.2165978 | -            | 5.54706 | -       |
| 180 | 0.95 | 1.9  | -184.2122248 | -            | 5.66605 | -       |
| 180 | 0.95 | 1.95 | -184.2084885 | -            | 5.76772 | -       |
| 180 | 0.95 | 2    | -184.2053311 | -            | 5.85363 | -       |
| 180 | 1    | 0.9  | -184.0914082 | -184.0391378 | 8.95347 | 10.3757 |
| 180 | 1    | 0.95 | -184.2027255 | -184.1493739 | 5.92453 | 7.37623 |
| 180 | 1    | 1    | -184.2767179 | -184.2226723 | 3.9112  | 5.38178 |
| 180 | 1    | 1.05 | -184.323664  | -            | 2.63379 | -       |
| 180 | 1    | 1.1  | -184.3511903 | -            | 1.8848  | -       |
| 180 | 1    | 1.15 | -184.3649775 | -            | 1.50965 | -       |
| 180 | 1    | 1.2  | -184.3692589 | -            | 1.39315 | -       |
| 180 | 1    | 1.25 | -184.3671783 | -            | 1.44977 | -       |
| 180 | 1    | 1.3  | -184.361046  | -            | 1.61663 | -       |
| 180 | 1    | 1.35 | -184.3525346 | -            | 1.84822 | -       |
| 180 | 1    | 1.4  | -184.3428173 | -            | 2.11263 | -       |
| 180 | 1    | 1.45 | -184.3326902 | -            | 2.38819 | -       |
| 180 | 1    | 1.5  | -184.3226644 | -            | 2.66099 | -       |
| 180 | 1    | 1.55 | -184.3130578 | -            | 2.92239 | -       |
| 180 | 1    | 1.6  | -184.3040622 | -184.3083505 | 3.16716 | 3.05047 |
| 180 | 1    | 1.65 | -184.295788  | -            | 3.3923  | -       |
| 180 | 1    | 1.7  | -184.2882937 | -184.3246004 | 3.59622 | 2.60831 |
| 180 | 1    | 1.75 | -184.2816019 | -            | 3.7783  | -       |
| 180 | 1    | 1.8  | -184.2757075 | -184.3382143 | 3.93869 | 2.23788 |
| 180 | 1    | 1.85 | -184.2705825 | -            | 4.07814 | -       |
| 180 | 1    | 1.9  | -184.2661819 | -184.348658  | 4.19788 | 1.9537  |
| 180 | 1    | 1.95 | -184.2624475 | -            | 4.29949 | -       |
| 180 | 1    | 2    | -184.2593119 | -184.3563562 | 4.38481 | 1.74424 |
| 180 | 1    | 2.1  | -            | -184.3618717 | -       | 1.59416 |
| 180 | 1    | 2.2  | -            | -184.365727  | -       | 1.48926 |
| 180 | 1    | 2.3  | -            | -184.3683566 | -       | 1.41771 |
| 180 | 1    | 2.4  | -            | -184.3701027 | -       | 1.3702  |

|     |      |      |              |              |         |         |
|-----|------|------|--------------|--------------|---------|---------|
| 180 | 1    | 2.5  | -            | -184.3712267 | -       | 1.33961 |
| 180 | 1    | 2.6  | -            | -184.371924  | -       | 1.32064 |
| 180 | 1    | 2.7  | -            | -184.3723344 | -       | 1.30947 |
| 180 | 1    | 2.8  | -            | -184.3725579 | -       | 1.30339 |
| 180 | 1    | 2.9  | -            | -184.3726604 | -       | 1.3006  |
| 180 | 1    | 3    | -            | -184.3726861 | -       | 1.2999  |
| 180 | 1.05 | 0.9  | -184.1313109 | -184.0805691 | 7.86772 | 9.2484  |
| 180 | 1.05 | 0.95 | -184.2412232 | -184.1891991 | 4.87701 | 6.29258 |
| 180 | 1.05 | 1    | -184.3140259 | -184.2611327 | 2.89605 | 4.33527 |
| 180 | 1.05 | 1.05 | -184.3599531 | -            | 1.64636 | -       |
| 180 | 1.05 | 1.1  | -184.3865856 | -            | 0.9217  | -       |
| 180 | 1.05 | 1.15 | -184.3995608 | -            | 0.56864 | -       |
| 180 | 1.05 | 1.2  | -184.4030767 | -            | 0.47297 | -       |
| 180 | 1.05 | 1.25 | -184.4002526 | -            | 0.54982 | -       |
| 180 | 1.05 | 1.3  | -184.3933895 | -            | 0.73656 | -       |
| 180 | 1.05 | 1.35 | -184.3841582 | -            | 0.98774 | -       |
| 180 | 1.05 | 1.4  | -184.3737415 | -            | 1.27118 | -       |
| 180 | 1.05 | 1.45 | -184.3629486 | -            | 1.56486 | -       |
| 180 | 1.05 | 1.5  | -184.3523073 | -            | 1.85441 | -       |
| 180 | 1.05 | 1.55 | -184.342155  | -            | 2.13065 | -       |
| 180 | 1.05 | 1.6  | -184.332686  | -184.3418384 | 2.3883  | 2.13927 |
| 180 | 1.05 | 1.65 | -184.3240182 | -            | 2.62416 | -       |
| 180 | 1.05 | 1.7  | -184.3162106 | -184.3569846 | 2.8366  | 1.72714 |
| 180 | 1.05 | 1.75 | -184.3092817 | -            | 3.02514 | -       |
| 180 | 1.05 | 1.8  | -184.3032187 | -184.3695698 | 3.19011 | 1.38469 |
| 180 | 1.05 | 1.85 | -184.2979831 | -            | 3.33257 | -       |
| 180 | 1.05 | 1.9  | -184.2935184 | -184.3792104 | 3.45405 | 1.12237 |
| 180 | 1.05 | 1.95 | -184.289755  | -            | 3.55646 | -       |
| 180 | 1.05 | 2    | -184.2866157 | -184.3863089 | 3.64188 | 0.92922 |
| 180 | 1.05 | 2.1  | -            | -184.3913806 | -       | 0.79122 |
| 180 | 1.05 | 2.2  | -            | -184.3949051 | -       | 0.69532 |
| 180 | 1.05 | 2.3  | -            | -184.397286  | -       | 0.63054 |
| 180 | 1.05 | 2.4  | -            | -184.3988429 | -       | 0.58817 |
| 180 | 1.05 | 2.5  | -            | -184.3998212 | -       | 0.56156 |
| 180 | 1.05 | 2.6  | -            | -184.4004041 | -       | 0.54569 |
| 180 | 1.05 | 2.7  | -            | -184.4007241 | -       | 0.53699 |
| 180 | 1.05 | 2.8  | -            | -184.4008732 | -       | 0.53293 |
| 180 | 1.05 | 2.9  | -            | -184.4009136 | -       | 0.53183 |
| 180 | 1.05 | 3    | -            | -184.4008866 | -       | 0.53256 |
| 180 | 1.1  | 0.9  | -184.1516446 | -184.1023306 | 7.31444 | 8.65627 |
| 180 | 1.1  | 0.95 | -184.2602917 | -184.209525  | 4.35815 | 5.73952 |
| 180 | 1.1  | 1    | -184.3320371 | -184.2802589 | 2.40596 | 3.81485 |
| 180 | 1.1  | 1.05 | -184.3770689 | -            | 1.18065 | -       |
| 180 | 1.1  | 1.1  | -184.4029214 | -            | 0.4772  | -       |
| 180 | 1.1  | 1.15 | -184.415189  | -            | 0.1434  | -       |
| 180 | 1.1  | 1.2  | -184.4180343 | -            | 0.06598 | -       |
| 180 | 1.1  | 1.25 | -184.4145514 | -            | 0.16075 | -       |
| 180 | 1.1  | 1.3  | -184.4070259 | -            | 0.36551 | -       |
| 180 | 1.1  | 1.35 | -184.3971247 | -            | 0.63493 | -       |
| 180 | 1.1  | 1.4  | -184.3860386 | -            | 0.93658 | -       |
| 180 | 1.1  | 1.45 | -184.3745904 | -            | 1.24809 | -       |
| 180 | 1.1  | 1.5  | -184.3633266 | -            | 1.55457 | -       |
| 180 | 1.1  | 1.55 | -184.3525907 | -            | 1.8467  | -       |
| 180 | 1.1  | 1.6  | -184.3426088 | -184.3566235 | 2.1183  | 1.73696 |
| 180 | 1.1  | 1.65 | -184.3334958 | -            | 2.36627 | -       |
| 180 | 1.1  | 1.7  | -184.3253208 | -184.3706193 | 2.58871 | 1.35614 |
| 180 | 1.1  | 1.75 | -184.3181026 | -            | 2.78512 | -       |
| 180 | 1.1  | 1.8  | -184.3118233 | -184.3821154 | 2.95598 | 1.04333 |
| 180 | 1.1  | 1.85 | -184.3064358 | -            | 3.10257 | -       |
| 180 | 1.1  | 1.9  | -184.3018721 | -184.3908859 | 3.22675 | 0.80468 |
| 180 | 1.1  | 1.95 | -184.298051  | -            | 3.33072 | -       |
| 180 | 1.1  | 2    | -184.2948844 | -184.3973253 | 3.41689 | 0.62947 |
| 180 | 1.1  | 2.1  | -            | -184.4019039 | -       | 0.50488 |
| 180 | 1.1  | 2.2  | -            | -184.4050604 | -       | 0.419   |
| 180 | 1.1  | 2.3  | -            | -184.4071639 | -       | 0.36176 |
| 180 | 1.1  | 2.4  | -            | -184.4085107 | -       | 0.32511 |
| 180 | 1.1  | 2.5  | -            | -184.4093261 | -       | 0.30293 |
| 180 | 1.1  | 2.6  | -            | -184.4097825 | -       | 0.29051 |
| 180 | 1.1  | 2.7  | -            | -184.4100018 | -       | 0.28454 |
| 180 | 1.1  | 2.8  | -            | -184.4100693 | -       | 0.28271 |
| 180 | 1.1  | 2.9  | -            | -184.4100421 | -       | 0.28344 |
| 180 | 1.1  | 3    | -            | -184.4099584 | -       | 0.28572 |
| 180 | 1.15 | 0.9  | -184.1581653 | -184.1101842 | 7.13701 | 8.44258 |

|     |      |      |              |              |         |         |
|-----|------|------|--------------|--------------|---------|---------|
| 180 | 1.15 | 0.95 | -184.2656514 | -184.2160731 | 4.21232 | 5.56134 |
| 180 | 1.15 | 1    | -184.3364379 | -184.2857335 | 2.28621 | 3.66588 |
| 180 | 1.15 | 1.05 | -184.3806668 | -            | 1.08275 | -       |
| 180 | 1.15 | 1.1  | -184.4058265 | -            | 0.39815 | -       |
| 180 | 1.15 | 1.15 | -184.4174701 | -            | 0.08133 | -       |
| 180 | 1.15 | 1.2  | -184.4197256 | -            | 0.01996 | -       |
| 180 | 1.15 | 1.25 | -184.4156601 | -            | 0.13058 | -       |
| 180 | 1.15 | 1.3  | -184.4075413 | -            | 0.35149 | -       |
| 180 | 1.15 | 1.35 | -184.3970289 | -            | 0.63753 | -       |
| 180 | 1.15 | 1.4  | -184.3853156 | -            | 0.95625 | -       |
| 180 | 1.15 | 1.45 | -184.3732334 | -            | 1.28501 | -       |
| 180 | 1.15 | 1.5  | -184.3613482 | -            | 1.6084  | -       |
| 180 | 1.15 | 1.55 | -184.3500277 | -            | 1.91644 | -       |
| 180 | 1.15 | 1.6  | -184.3394942 | -184.3579224 | 2.20305 | 1.70162 |
| 180 | 1.15 | 1.65 | -184.3298933 | -            | 2.46429 | -       |
| 180 | 1.15 | 1.7  | -184.3213018 | -184.3707593 | 2.69807 | 1.35233 |
| 180 | 1.15 | 1.75 | -184.3137447 | -            | 2.9037  | -       |
| 180 | 1.15 | 1.8  | -184.3072024 | -184.3811577 | 3.08171 | 1.06939 |
| 180 | 1.15 | 1.85 | -184.3016227 | -            | 3.23354 | -       |
| 180 | 1.15 | 1.9  | -184.2969257 | -184.3890412 | 3.36134 | 0.85488 |
| 180 | 1.15 | 1.95 | -184.2930187 | -            | 3.46765 | -       |
| 180 | 1.15 | 2    | -184.2898023 | -184.3948022 | 3.55517 | 0.69812 |
| 180 | 1.15 | 2.1  | -            | -184.398874  | -       | 0.58733 |
| 180 | 1.15 | 2.2  | -            | -184.4016535 | -       | 0.5117  |
| 180 | 1.15 | 2.3  | -            | -184.4034761 | -       | 0.4621  |
| 180 | 1.15 | 2.4  | -            | -184.4046113 | -       | 0.43122 |
| 180 | 1.15 | 2.5  | -            | -184.4052665 | -       | 0.41339 |
| 180 | 1.15 | 2.6  | -            | -184.4055978 | -       | 0.40437 |
| 180 | 1.15 | 2.7  | -            | -184.4057177 | -       | 0.40111 |
| 180 | 1.15 | 2.8  | -            | -184.4057032 | -       | 0.4015  |
| 180 | 1.15 | 2.9  | -            | -184.405608  | -       | 0.4041  |
| 180 | 1.15 | 3    | -            | -184.4054658 | -       | 0.40796 |
| 180 | 1.2  | 0.9  | -184.1551991 | -184.1084732 | 7.21772 | 8.48913 |
| 180 | 1.2  | 0.95 | -184.2615915 | -184.213144  | 4.32278 | 5.64104 |
| 180 | 1.2  | 1    | -184.3314841 | -184.2817038 | 2.42101 | 3.77553 |
| 180 | 1.2  | 1.05 | -184.3749725 | -            | 1.23769 | -       |
| 180 | 1.2  | 1.1  | -184.399501  | -            | 0.57027 | -       |
| 180 | 1.2  | 1.15 | -184.4105836 | -            | 0.26871 | -       |
| 180 | 1.2  | 1.2  | -184.4123145 | -            | 0.22161 | -       |
| 180 | 1.2  | 1.25 | -184.407733  | -            | 0.34628 | -       |
| 180 | 1.2  | 1.3  | -184.3990857 | -            | 0.58157 | -       |
| 180 | 1.2  | 1.35 | -184.3880203 | -            | 0.88266 | -       |
| 180 | 1.2  | 1.4  | -184.3757284 | -            | 1.21712 | -       |
| 180 | 1.2  | 1.45 | -184.3630538 | -            | 1.56199 | -       |
| 180 | 1.2  | 1.5  | -184.3505683 | -            | 1.90173 | -       |
| 180 | 1.2  | 1.55 | -184.3386533 | -            | 2.22593 | -       |
| 180 | 1.2  | 1.6  | -184.3275526 | -184.3498825 | 2.52798 | 1.92039 |
| 180 | 1.2  | 1.65 | -184.3174334 | -            | 2.80333 | -       |
| 180 | 1.2  | 1.7  | -184.3083831 | -184.3613917 | 3.04959 | 1.60722 |
| 180 | 1.2  | 1.75 | -184.3004402 | -            | 3.26571 | -       |
| 180 | 1.2  | 1.8  | -184.2935905 | -184.3705491 | 3.45209 | 1.35805 |
| 180 | 1.2  | 1.85 | -184.2877771 | -            | 3.61027 | -       |
| 180 | 1.2  | 1.9  | -184.2829126 | -184.3774001 | 3.74264 | 1.17163 |
| 180 | 1.2  | 1.95 | -184.2788918 | -            | 3.85204 | -       |
| 180 | 1.2  | 2    | -184.2756029 | -184.3823402 | 3.94153 | 1.03721 |
| 180 | 1.2  | 2.1  | -            | -184.3857728 | -       | 0.94381 |
| 180 | 1.2  | 2.2  | -            | -184.3880582 | -       | 0.88163 |
| 180 | 1.2  | 2.3  | -            | -184.3911279 | -       | 0.7981  |
| 180 | 1.2  | 2.4  | -            | -184.3919791 | -       | 0.77494 |
| 180 | 1.2  | 2.5  | -            | -184.3924156 | -       | 0.76306 |
| 180 | 1.2  | 2.6  | -            | -184.3925762 | -       | 0.75869 |
| 180 | 1.2  | 2.7  | -            | -184.3925616 | -       | 0.75909 |
| 180 | 1.2  | 2.8  | -            | -184.3924412 | -       | 0.76236 |
| 180 | 1.2  | 2.9  | -            | -184.3905721 | -       | 0.81322 |
| 180 | 1.2  | 3    | -            | -184.3903531 | -       | 0.81918 |
| 180 | 1.25 | 0.9  | -184.1459762 | -184.1004409 | 7.46868 | 8.70769 |
| 180 | 1.25 | 0.95 | -184.2513122 | -184.2038014 | 4.60249 | 5.89525 |
| 180 | 1.25 | 1    | -184.3203485 | -184.2717132 | 2.72401 | 4.04737 |
| 180 | 1.25 | 1.05 | -184.3631348 | -            | 1.55979 | -       |
| 180 | 1.25 | 1.1  | -184.3870735 | -            | 0.90842 | -       |
| 180 | 1.25 | 1.15 | -184.3976406 | -            | 0.62089 | -       |
| 180 | 1.25 | 1.2  | -184.3988973 | -            | 0.58669 | -       |
| 180 | 1.25 | 1.25 | -184.3938549 | -            | 0.7239  | -       |

|     |      |      |              |              |         |         |
|-----|------|------|--------------|--------------|---------|---------|
| 180 | 1.25 | 1.3  | -184.3847362 | -            | 0.97202 | -       |
| 180 | 1.25 | 1.35 | -184.3731741 | -            | 1.28662 | -       |
| 180 | 1.25 | 1.4  | -184.3603556 | -            | 1.63541 | -       |
| 180 | 1.25 | 1.45 | -184.3471271 | -            | 1.99536 | -       |
| 180 | 1.25 | 1.5  | -184.3340725 | -            | 2.35058 | -       |
| 180 | 1.25 | 1.55 | -184.3215815 | -            | 2.69046 | -       |
| 180 | 1.25 | 1.6  | -184.3099157 | -            | 3.00788 | -       |
| 180 | 1.25 | 1.65 | -184.2992536 | -            | 3.298   | -       |
| 180 | 1.25 | 1.7  | -184.2897098 | -            | 3.55769 | -       |
| 180 | 1.25 | 1.75 | -184.2813394 | -            | 3.78544 | -       |
| 180 | 1.25 | 1.8  | -184.2741387 | -            | 3.98138 | -       |
| 180 | 1.25 | 1.85 | -184.2680518 | -            | 4.147   | -       |
| 180 | 1.25 | 1.9  | -184.2629848 | -            | 4.28487 | -       |
| 180 | 1.25 | 1.95 | -184.2588215 | -            | 4.39816 | -       |
| 180 | 1.25 | 2    | -184.2554375 | -            | 4.49024 | -       |
| 180 | 1.3  | 0.9  | -184.1328876 | -184.0884774 | 7.82482 | 9.03322 |
| 180 | 1.3  | 0.95 | -184.2371842 | -184.190876  | 4.98691 | 6.24695 |
| 180 | 1.3  | 1    | -184.3053834 | -184.2577863 | 3.13121 | 4.42632 |
| 180 | 1.3  | 1.05 | -184.3474897 | -            | 1.98549 | -       |
| 180 | 1.3  | 1.1  | -184.3708643 | -            | 1.34947 | -       |
| 180 | 1.3  | 1.15 | -184.3809475 | -            | 1.07511 | -       |
| 180 | 1.3  | 1.2  | -184.3817679 | -            | 1.05278 | -       |
| 180 | 1.3  | 1.25 | -184.376307  | -            | 1.20137 | -       |
| 180 | 1.3  | 1.3  | -184.3667646 | -            | 1.46102 | -       |
| 180 | 1.3  | 1.35 | -184.3547556 | -            | 1.78779 | -       |
| 180 | 1.3  | 1.4  | -184.3414601 | -            | 2.14956 | -       |
| 180 | 1.3  | 1.45 | -184.3277238 | -            | 2.52332 | -       |
| 180 | 1.3  | 1.5  | -184.3141375 | -            | 2.89301 | -       |
| 180 | 1.3  | 1.55 | -184.3010993 | -            | 3.24778 | -       |
| 180 | 1.3  | 1.6  | -184.2888787 | -            | 3.5803  | -       |
| 180 | 1.3  | 1.65 | -184.2776688 | -            | 3.88532 | -       |
| 180 | 1.3  | 1.7  | -184.2676086 | -            | 4.15906 | -       |
| 180 | 1.3  | 1.75 | -184.2587754 | -            | 4.39941 | -       |
| 180 | 1.3  | 1.8  | -184.251183  | -            | 4.606   | -       |
| 180 | 1.3  | 1.85 | -184.2447833 | -            | 4.78014 | -       |
| 180 | 1.3  | 1.9  | -184.2394795 | -            | 4.92445 | -       |
| 180 | 1.3  | 1.95 | -184.2351449 | -            | 5.0424  | -       |
| 180 | 1.3  | 2    | -184.2316425 | -            | 5.1377  | -       |
| 180 | 1.35 | 0.9  | -184.1176789 | -184.074253  | 8.23865 | 9.42026 |
| 180 | 1.35 | 0.95 | -184.2209436 | -184.1757208 | 5.42882 | 6.65933 |
| 180 | 1.35 | 1    | -184.2883145 | -184.2417909 | 3.59565 | 4.86156 |
| 180 | 1.35 | 1.05 | -184.3297516 | -            | 2.46815 | -       |
| 180 | 1.35 | 1.1  | -184.3525778 | -            | 1.84705 | -       |
| 180 | 1.35 | 1.15 | -184.3621968 | -            | 1.58531 | -       |
| 180 | 1.35 | 1.2  | -184.3626066 | -            | 1.57416 | -       |
| 180 | 1.35 | 1.25 | -184.3567604 | -            | 1.73324 | -       |
| 180 | 1.35 | 1.3  | -184.3468327 | -            | 2.00337 | -       |
| 180 | 1.35 | 1.35 | -184.3344191 | -            | 2.34115 | -       |
| 180 | 1.35 | 1.4  | -184.3206888 | -            | 2.71475 | -       |
| 180 | 1.35 | 1.45 | -184.3064898 | -            | 3.1011  | -       |
| 180 | 1.35 | 1.5  | -184.2924164 | -            | 3.48404 | -       |
| 180 | 1.35 | 1.55 | -184.2788681 | -            | 3.85269 | -       |
| 180 | 1.35 | 1.6  | -184.2661175 | -            | 4.19963 | -       |
| 180 | 1.35 | 1.65 | -184.2543702 | -            | 4.51928 | -       |
| 180 | 1.35 | 1.7  | -184.243782  | -            | 4.80738 | -       |
| 180 | 1.35 | 1.75 | -184.234458  | -            | 5.06109 | -       |
| 180 | 1.35 | 1.8  | -184.2264414 | -            | 5.27922 | -       |
| 180 | 1.35 | 1.85 | -184.2196922 | -            | 5.46287 | -       |
| 180 | 1.35 | 1.9  | -184.2141157 | -            | 5.6146  | -       |
| 180 | 1.35 | 1.95 | -184.2095827 | -            | 5.73794 | -       |
| 180 | 1.35 | 2    | -184.2059392 | -            | 5.83708 | -       |
| 180 | 1.4  | 0.9  | -184.1015937 | -184.05893   | 8.67633 | 9.8372  |
| 180 | 1.4  | 0.95 | -184.2038327 | -184.1597129 | 5.8944  | 7.0949  |
| 180 | 1.4  | 1    | -184.2703809 | -184.2250288 | 4.08362 | 5.31766 |
| 180 | 1.4  | 1.05 | -184.3111569 | -            | 2.97411 | -       |
| 180 | 1.4  | 1.1  | -184.3334421 | -            | 2.36773 | -       |
| 180 | 1.4  | 1.15 | -184.342609  | -            | 2.1183  | -       |
| 180 | 1.4  | 1.2  | -184.3426253 | -            | 2.11786 | -       |
| 180 | 1.4  | 1.25 | -184.3364186 | -            | 2.28674 | -       |
| 180 | 1.4  | 1.3  | -184.3261362 | -            | 2.56652 | -       |
| 180 | 1.4  | 1.35 | -184.3133536 | -            | 2.91434 | -       |
| 180 | 1.4  | 1.4  | -184.2992269 | -            | 3.29873 | -       |
| 180 | 1.4  | 1.45 | -184.2846037 | -            | 3.69662 | -       |



|     |      |      |              |              |         |         |
|-----|------|------|--------------|--------------|---------|---------|
| 180 | 1.4  | 1.5  | -184.270084  | -            | 4.0917  | -       |
| 180 | 1.4  | 1.55 | -184.2560694 | -            | 4.47304 | -       |
| 180 | 1.4  | 1.6  | -184.242829  | -            | 4.83331 | -       |
| 180 | 1.4  | 1.65 | -184.2305666 | -            | 5.16697 | -       |
| 180 | 1.4  | 1.7  | -184.2194559 | -            | 5.46929 | -       |
| 180 | 1.4  | 1.75 | -184.2096303 | -            | 5.73665 | -       |
| 180 | 1.4  | 1.8  | -184.2011589 | -            | 5.96715 | -       |
| 180 | 1.4  | 1.85 | -184.1940275 | -            | 6.1612  | -       |
| 180 | 1.4  | 1.9  | -184.1881499 | -            | 6.32113 | -       |
| 180 | 1.4  | 1.95 | -184.1833841 | -            | 6.45081 | -       |
| 180 | 1.4  | 2    | -184.17958   | -            | 6.55432 | -       |
| 180 | 1.45 | 0.9  | -184.0854827 | -184.0437287 | 9.1147  | 10.2508 |
| 180 | 1.45 | 0.95 | -184.1867081 | -184.1437824 | 6.36036 | 7.52837 |
| 180 | 1.45 | 1    | -184.2524438 | -184.2084596 | 4.57169 | 5.7685  |
| 180 | 1.45 | 1.05 | -184.2925657 | -            | 3.47998 | -       |
| 180 | 1.45 | 1.1  | -184.3143167 | -            | 2.88813 | -       |
| 180 | 1.45 | 1.15 | -184.3230398 | -            | 2.65078 | -       |
| 180 | 1.45 | 1.2  | -184.3226768 | -            | 2.66065 | -       |
| 180 | 1.45 | 1.25 | -184.316126  | -            | 2.8389  | -       |
| 180 | 1.45 | 1.3  | -184.3055156 | -            | 3.12761 | -       |
| 180 | 1.45 | 1.35 | -184.2923956 | -            | 3.4846  | -       |
| 180 | 1.45 | 1.4  | -184.2779059 | -            | 3.87887 | -       |
| 180 | 1.45 | 1.45 | -184.2628919 | -            | 4.2874  | -       |
| 180 | 1.45 | 1.5  | -184.2479638 | -            | 4.69359 | -       |
| 180 | 1.45 | 1.55 | -184.2335265 | -            | 5.08643 | -       |
| 180 | 1.45 | 1.6  | -184.2198417 | -            | 5.4588  | -       |
| 180 | 1.45 | 1.65 | -184.2071047 | -            | 5.80537 | -       |
| 180 | 1.45 | 1.7  | -184.1954927 | -            | 6.12133 | -       |
| 180 | 1.45 | 1.75 | -184.1851647 | -            | 6.40236 | -       |
| 180 | 1.45 | 1.8  | -184.1762232 | -            | 6.64566 | -       |
| 180 | 1.45 | 1.85 | -184.1686841 | -            | 6.85079 | -       |
| 180 | 1.45 | 1.9  | -184.1624766 | -            | 7.0197  | -       |
| 180 | 1.45 | 1.95 | -184.157459  | -            | 7.15623 | -       |
| 180 | 1.45 | 2    | -184.1534667 | -            | 7.26486 | -       |
| 180 | 1.5  | 0.9  | -184.0698941 | -184.0294039 | 9.53887 | 10.6406 |
| 180 | 1.5  | 0.95 | -184.1701268 | -184.1285837 | 6.81154 | 7.94193 |
| 180 | 1.5  | 1    | -184.2350688 | -184.1928214 | 5.04447 | 6.19402 |
| 180 | 1.5  | 1.05 | -184.2745513 | -            | 3.97015 | -       |
| 180 | 1.5  | 1.1  | -184.2957797 | -            | 3.39252 | -       |
| 180 | 1.5  | 1.15 | -184.3040687 | -            | 3.16698 | -       |
| 180 | 1.5  | 1.2  | -184.3033349 | -            | 3.18695 | -       |
| 180 | 1.5  | 1.25 | -184.2964583 | -            | 3.37406 | -       |
| 180 | 1.5  | 1.3  | -184.2855425 | -            | 3.67108 | -       |
| 180 | 1.5  | 1.35 | -184.2721155 | -            | 4.03643 | -       |
| 180 | 1.5  | 1.4  | -184.2572963 | -            | 4.43966 | -       |
| 180 | 1.5  | 1.45 | -184.2419228 | -            | 4.85797 | -       |
| 180 | 1.5  | 1.5  | -184.2266173 | -            | 5.27443 | -       |
| 180 | 1.5  | 1.55 | -184.2117982 | -            | 5.67766 | -       |
| 180 | 1.5  | 1.6  | -184.1977195 | -            | 6.06074 | -       |
| 180 | 1.5  | 1.65 | -184.1845576 | -            | 6.41888 | -       |
| 180 | 1.5  | 1.7  | -184.1724838 | -            | 6.7474  | -       |
| 180 | 1.5  | 1.75 | -184.1616713 | -            | 7.04161 | -       |
| 180 | 1.5  | 1.8  | -184.1522559 | -            | 7.29781 | -       |
| 180 | 1.5  | 1.85 | -184.1442932 | -            | 7.51447 | -       |
| 180 | 1.5  | 1.9  | -184.1377332 | -            | 7.69297 | -       |
| 180 | 1.5  | 1.95 | -184.1324409 | -            | 7.83697 | -       |
| 180 | 1.5  | 2    | -184.128241  | -            | 7.95125 | -       |
| 180 | 1.55 | 0.9  | -184.0551479 | -184.0162786 | 9.94012 | 10.9977 |
| 180 | 1.55 | 0.95 | -184.1544201 | -184.1146173 | 7.23892 | 8.32195 |
| 180 | 1.55 | 1    | -184.2185999 | -184.1787719 | 5.49259 | 6.57631 |
| 180 | 1.55 | 1.05 | -184.2574667 | -            | 4.43502 | -       |
| 180 | 1.55 | 1.1  | -184.278192  | -            | 3.87109 | -       |
| 180 | 1.55 | 1.15 | -184.2860623 | -            | 3.65693 | -       |
| 180 | 1.55 | 1.2  | -184.2849727 | -            | 3.68658 | -       |
| 180 | 1.55 | 1.25 | -184.2777852 | -            | 3.88215 | -       |
| 180 | 1.55 | 1.3  | -184.2665858 | -            | 4.18689 | -       |
| 180 | 1.55 | 1.35 | -184.2528828 | -            | 4.55975 | -       |
| 180 | 1.55 | 1.4  | -184.2377711 | -            | 4.97094 | -       |
| 180 | 1.55 | 1.45 | -184.2220737 | -            | 5.39806 | -       |
| 180 | 1.55 | 1.5  | -184.2064216 | -            | 5.82396 | -       |
| 180 | 1.55 | 1.55 | -184.1912565 | -            | 6.2366  | -       |
| 180 | 1.55 | 1.6  | -184.1768335 | -            | 6.62905 | -       |
| 180 | 1.55 | 1.65 | -184.1633063 | -            | 6.99713 | -       |

|     |      |      |              |              |         |         |
|-----|------|------|--------------|--------------|---------|---------|
| 180 | 1.55 | 1.7  | -184.1508231 | -            | 7.33679 | -       |
| 180 | 1.55 | 1.75 | -184.1395636 | -            | 7.64316 | -       |
| 180 | 1.55 | 1.8  | -184.1296884 | -            | 7.91187 | -       |
| 180 | 1.55 | 1.85 | -184.1212969 | -            | 8.1402  | -       |
| 180 | 1.55 | 1.9  | -184.1143675 | -            | 8.32875 | -       |
| 180 | 1.55 | 1.95 | -184.1087812 | -            | 8.48075 | -       |
| 180 | 1.55 | 2    | -184.1043571 | -            | 8.60113 | -       |
| 180 | 1.6  | 0.9  | -184.0414048 | -184.0044219 | 10.3141 | 11.3204 |
| 180 | 1.6  | 0.95 | -184.1397568 | -184.1023734 | 7.63791 | 8.65511 |
| 180 | 1.6  | 1    | -184.2032128 | -184.1670884 | 5.91127 | 6.89421 |
| 180 | 1.6  | 1.05 | -184.2414998 | -            | 4.86948 | -       |
| 180 | 1.6  | 1.1  | -184.2617522 | -            | 4.31841 | -       |
| 180 | 1.6  | 1.15 | -184.2692274 | -            | 4.11501 | -       |
| 180 | 1.6  | 1.2  | -184.2678014 | -            | 4.15381 | -       |
| 180 | 1.6  | 1.25 | -184.2603218 | -            | 4.35733 | -       |
| 180 | 1.6  | 1.3  | -184.2488619 | -            | 4.66916 | -       |
| 180 | 1.6  | 1.35 | -184.2349134 | -            | 5.0487  | -       |
| 180 | 1.6  | 1.4  | -184.2195514 | -            | 5.4667  | -       |
| 180 | 1.6  | 1.45 | -184.2035749 | -            | 5.90142 | -       |
| 180 | 1.6  | 1.5  | -184.1876153 | -            | 6.33568 | -       |
| 180 | 1.6  | 1.55 | -184.1721418 | -            | 6.75671 | -       |
| 180 | 1.6  | 1.6  | -184.1574269 | -            | 7.1571  | -       |
| 180 | 1.6  | 1.65 | -184.1436011 | -            | 7.5333  | -       |
| 180 | 1.6  | 1.7  | -184.1307779 | -            | 7.88222 | -       |
| 180 | 1.6  | 1.75 | -184.1191225 | -            | 8.19937 | -       |
| 180 | 1.6  | 1.8  | -184.1088183 | -            | 8.47974 | -       |
| 180 | 1.6  | 1.85 | -184.1000054 | -            | 8.71954 | -       |
| 180 | 1.6  | 1.9  | -184.0927025 | -            | 8.91825 | -       |
| 180 | 1.6  | 1.95 | -184.0868105 | -            | 9.07858 | -       |
| 180 | 1.6  | 2    | -184.0821516 | -            | 9.20535 | -       |
| 180 | 1.65 | 0.9  | -184.0287203 | -183.9940141 | 10.6592 | 11.6036 |
| 180 | 1.65 | 0.95 | -184.1261972 | -184.0925629 | 8.00686 | 8.92205 |
| 180 | 1.65 | 1    | -184.1889756 | -184.1588872 | 6.29866 | 7.11737 |
| 180 | 1.65 | 1.05 | -184.2267266 | -            | 5.27146 | -       |
| 180 | 1.65 | 1.1  | -184.2465454 | -            | 4.73219 | -       |
| 180 | 1.65 | 1.15 | -184.2536532 | -            | 4.53879 | -       |
| 180 | 1.65 | 1.2  | -184.2519161 | -            | 4.58605 | -       |
| 180 | 1.65 | 1.25 | -184.244167  | -            | 4.79691 | -       |
| 180 | 1.65 | 1.3  | -184.23247   | -            | 5.11518 | -       |
| 180 | 1.65 | 1.35 | -184.2183069 | -            | 5.50056 | -       |
| 180 | 1.65 | 1.4  | -184.2027366 | -            | 5.92423 | -       |
| 180 | 1.65 | 1.45 | -184.1865354 | -            | 6.36506 | -       |
| 180 | 1.65 | 1.5  | -184.1703233 | -            | 6.80619 | -       |
| 180 | 1.65 | 1.55 | -184.1545942 | -            | 7.23418 | -       |
| 180 | 1.65 | 1.6  | -184.1396516 | -            | 7.64077 | -       |
| 180 | 1.65 | 1.65 | -184.1256121 | -            | 8.02278 | -       |
| 180 | 1.65 | 1.7  | -184.1125398 | -            | 8.37848 | -       |
| 180 | 1.65 | 1.75 | -184.1005649 | -            | 8.70432 | -       |
| 180 | 1.65 | 1.8  | -184.0898825 | -            | 8.99499 | -       |
| 180 | 1.65 | 1.85 | -184.0806693 | -            | 9.24568 | -       |
| 180 | 1.65 | 1.9  | -184.072994  | -            | 9.45452 | -       |
| 180 | 1.65 | 1.95 | -184.0667883 | -            | 9.62338 | -       |
| 180 | 1.65 | 2    | -184.0618825 | -            | 9.75687 | -       |
| 180 | 1.7  | 0.9  | -184.0170849 | -183.9855406 | 10.9758 | 11.8341 |
| 180 | 1.7  | 0.95 | -184.1137363 | -184.0865078 | 8.34593 | 9.08681 |
| 180 | 1.7  | 1    | -184.1758865 | -184.1555781 | 6.65482 | 7.20741 |
| 180 | 1.7  | 1.05 | -184.213149  | -            | 5.64091 | -       |
| 180 | 1.7  | 1.1  | -184.2325737 | -            | 5.11236 | -       |
| 180 | 1.7  | 1.15 | -184.2393513 | -            | 4.92794 | -       |
| 180 | 1.7  | 1.2  | -184.2373315 | -            | 4.9829  | -       |
| 180 | 1.7  | 1.25 | -184.2293369 | -            | 5.20043 | -       |
| 180 | 1.7  | 1.3  | -184.2174249 | -            | 5.52456 | -       |
| 180 | 1.7  | 1.35 | -184.2030744 | -            | 5.91504 | -       |
| 180 | 1.7  | 1.4  | -184.1873334 | -            | 6.34335 | -       |
| 180 | 1.7  | 1.45 | -184.1709613 | -            | 6.78883 | -       |
| 180 | 1.7  | 1.5  | -184.1545624 | -            | 7.23505 | -       |
| 180 | 1.7  | 1.55 | -184.1386472 | -            | 7.6681  | -       |
| 180 | 1.7  | 1.6  | -184.1235665 | -            | 8.07844 | -       |
| 180 | 1.7  | 1.65 | -184.1094356 | -            | 8.46295 | -       |
| 180 | 1.7  | 1.7  | -184.0962597 | -            | 8.82146 | -       |
| 180 | 1.7  | 1.75 | -184.0841001 | -            | 9.15233 | -       |
| 180 | 1.7  | 1.8  | -184.0731302 | -            | 9.45082 | -       |
| 180 | 1.7  | 1.85 | -184.0635616 | -            | 9.71118 | -       |

|     |      |      |              |              |         |         |
|-----|------|------|--------------|--------------|---------|---------|
| 180 | 1.7  | 1.9  | -184.0555228 | -            | 9.92991 | -       |
| 180 | 1.7  | 1.95 | -184.0489914 | -            | 10.1076 | -       |
| 180 | 1.7  | 2    | -184.0438201 | -            | 10.2483 | -       |
| 180 | 1.75 | 0.9  | -184.0064501 | -183.9798704 | 11.2652 | 11.9884 |
| 180 | 1.75 | 0.95 | -184.1023296 | -184.0865579 | 8.6563  | 9.08545 |
| 180 | 1.75 | 1    | -184.1639056 | -184.1583031 | 6.98082 | 7.13326 |
| 180 | 1.75 | 1.05 | -184.20073   | -            | 5.97883 | -       |
| 180 | 1.75 | 1.1  | -184.2198048 | -            | 5.4598  | -       |
| 180 | 1.75 | 1.15 | -184.2262886 | -            | 5.28338 | -       |
| 180 | 1.75 | 1.2  | -184.2240153 | -            | 5.34523 | -       |
| 180 | 1.75 | 1.25 | -184.2157984 | -            | 5.56881 | -       |
| 180 | 1.75 | 1.3  | -184.203692  | -            | 5.89823 | -       |
| 180 | 1.75 | 1.35 | -184.1891738 | -            | 6.29327 | -       |
| 180 | 1.75 | 1.4  | -184.1732889 | -            | 6.7255  | -       |
| 180 | 1.75 | 1.45 | -184.156788  | -            | 7.17449 | -       |
| 180 | 1.75 | 1.5  | -184.1402617 | -            | 7.62417 | -       |
| 180 | 1.75 | 1.55 | -184.1242363 | -            | 8.06022 | -       |
| 180 | 1.75 | 1.6  | -184.1091171 | -            | 8.47161 | -       |
| 180 | 1.75 | 1.65 | -184.0950515 | -            | 8.85434 | -       |
| 180 | 1.75 | 1.7  | -184.0819919 | -            | 9.20969 | -       |
| 180 | 1.75 | 1.75 | -184.0698963 | -            | 9.53881 | -       |
| 180 | 1.75 | 1.8  | -184.0588591 | -            | 9.83913 | -       |
| 180 | 1.75 | 1.85 | -184.0490831 | -            | 10.1051 | -       |
| 180 | 1.75 | 1.9  | -184.0407498 | -            | 10.3319 | -       |
| 180 | 1.75 | 1.95 | -184.0339007 | -            | 10.5183 | -       |
| 180 | 1.75 | 2    | -184.0284362 | -            | 10.6669 | -       |
| 180 | 1.8  | 0.9  | -183.9967483 | -183.9787085 | 11.5292 | 12.02   |
| 180 | 1.8  | 0.95 | -184.091914  | -184.088339  | 8.93971 | 9.03698 |
| 180 | 1.8  | 1    | -184.1529737 | -184.168222  | 7.27827 | 6.86337 |
| 180 | 1.8  | 1.05 | -184.1894133 | -            | 6.28675 | -       |
| 180 | 1.8  | 1.1  | -184.20818   | -            | 5.77611 | -       |
| 180 | 1.8  | 1.15 | -184.2144112 | -            | 5.60656 | -       |
| 180 | 1.8  | 1.2  | -184.211913  | -            | 5.67454 | -       |
| 180 | 1.8  | 1.25 | -184.2034957 | -            | 5.90357 | -       |
| 180 | 1.8  | 1.3  | -184.1912124 | -            | 6.2378  | -       |
| 180 | 1.8  | 1.35 | -184.1765387 | -            | 6.63707 | -       |
| 180 | 1.8  | 1.4  | -184.1605258 | -            | 7.07278 | -       |
| 180 | 1.8  | 1.45 | -184.1439212 | -            | 7.52459 | -       |
| 180 | 1.8  | 1.5  | -184.1273087 | -            | 7.97662 | -       |
| 180 | 1.8  | 1.55 | -184.1112304 | -            | 8.41411 | -       |
| 180 | 1.8  | 1.6  | -184.0961557 | -            | 8.82429 | -       |
| 180 | 1.8  | 1.65 | -184.0823016 | -            | 9.20126 | -       |
| 180 | 1.8  | 1.7  | -184.0696027 | -            | 9.5468  | -       |
| 180 | 1.8  | 1.75 | -184.0579152 | -            | 9.86482 | -       |
| 180 | 1.8  | 1.8  | -184.0472089 | -            | 10.1561 | -       |
| 180 | 1.8  | 1.85 | -184.0376063 | -            | 10.4174 | -       |
| 180 | 1.8  | 1.9  | -184.0292855 | -            | 10.6438 | -       |
| 180 | 1.8  | 1.95 | -184.0223375 | -            | 10.8329 | -       |
| 180 | 1.8  | 2    | -184.0167112 | -            | 10.986  | -       |
| 180 | 1.85 | 0.9  | -183.9878998 | -183.9850508 | 11.7699 | 11.8475 |
| 180 | 1.85 | 0.95 | -184.082418  | -184.1082186 | 9.1981  | 8.49606 |
| 180 | 1.85 | 1    | -184.1430231 | -184.0907284 | 7.54903 | 8.97197 |
| 180 | 1.85 | 1.05 | -184.1791343 | -            | 6.56645 | -       |
| 180 | 1.85 | 1.1  | -184.1976445 | -            | 6.06278 | -       |
| 180 | 1.85 | 1.15 | -184.2036571 | -            | 5.89918 | -       |
| 180 | 1.85 | 1.2  | -184.2009634 | -            | 5.97248 | -       |
| 180 | 1.85 | 1.25 | -184.192365  | -            | 6.20644 | -       |
| 180 | 1.85 | 1.3  | -184.1799162 | -            | 6.54517 | -       |
| 180 | 1.85 | 1.35 | -184.1650985 | -            | 6.94836 | -       |
| 180 | 1.85 | 1.4  | -184.1489643 | -            | 7.38737 | -       |
| 180 | 1.85 | 1.45 | -184.1322664 | -            | 7.84172 | -       |
| 180 | 1.85 | 1.5  | -184.1155882 | -            | 8.29553 | -       |
| 180 | 1.85 | 1.55 | -184.0994889 | -            | 8.7336  | -       |
| 180 | 1.85 | 1.6  | -184.0845097 | -            | 9.14118 | -       |
| 180 | 1.85 | 1.65 | -184.070964  | -            | 9.50976 | -       |
| 180 | 1.85 | 1.7  | -184.0588147 | -            | 9.84034 | -       |
| 180 | 1.85 | 1.75 | -184.0478471 | -            | 10.1388 | -       |
| 180 | 1.85 | 1.8  | -184.0379064 | -            | 10.4093 | -       |
| 180 | 1.85 | 1.85 | -184.0289944 | -            | 10.6518 | -       |
| 180 | 1.85 | 1.9  | -184.0212241 | -            | 10.8632 | -       |
| 180 | 1.85 | 1.95 | -184.014686  | -            | 11.0411 | -       |
| 180 | 1.85 | 2    | -184.0093565 | -            | 11.1861 | -       |
| 180 | 1.9  | 0.9  | -183.979819  | -184.0032541 | 11.9898 | 11.3521 |

|     |      |      |              |              |         |         |
|-----|------|------|--------------|--------------|---------|---------|
| 180 | 1.9  | 0.95 | -184.0737619 | -184.0278841 | 9.43363 | 10.682  |
| 180 | 1.9  | 1    | -184.1339814 | -184.0829201 | 7.79506 | 9.18443 |
| 180 | 1.9  | 1.05 | -184.1698254 | -            | 6.81974 | -       |
| 180 | 1.9  | 1.1  | -184.18813   | -            | 6.32167 | -       |
| 180 | 1.9  | 1.15 | -184.1939651 | -            | 6.1629  | -       |
| 180 | 1.9  | 1.2  | -184.1911037 | -            | 6.24076 | -       |
| 180 | 1.9  | 1.25 | -184.1823448 | -            | 6.47909 | -       |
| 180 | 1.9  | 1.3  | -184.1697435 | -            | 6.82197 | -       |
| 180 | 1.9  | 1.35 | -184.1547873 | -            | 7.22893 | -       |
| 180 | 1.9  | 1.4  | -184.1385322 | -            | 7.67123 | -       |
| 180 | 1.9  | 1.45 | -184.1217416 | -            | 8.1281  | -       |
| 180 | 1.9  | 1.5  | -184.1050025 | -            | 8.58357 | -       |
| 180 | 1.9  | 1.55 | -184.0888942 | -            | 9.02188 | -       |
| 180 | 1.9  | 1.6  | -184.0740295 | -            | 9.42635 | -       |
| 180 | 1.9  | 1.65 | -184.0608389 | -            | 9.78526 | -       |
| 180 | 1.9  | 1.7  | -184.049347  | -            | 10.098  | -       |
| 180 | 1.9  | 1.75 | -184.0393059 | -            | 10.3712 | -       |
| 180 | 1.9  | 1.8  | -184.0304585 | -            | 10.6119 | -       |
| 180 | 1.9  | 1.85 | -184.0226809 | -            | 10.8235 | -       |
| 180 | 1.9  | 1.9  | -184.0159813 | -            | 11.0058 | -       |
| 180 | 1.9  | 1.95 | -184.0103982 | -            | 11.1578 | -       |
| 180 | 1.9  | 2    | -184.0058927 | -            | 11.2803 | -       |
| 180 | 1.95 | 0.9  | -183.9724225 | -183.9362111 | 12.1911 | 13.1764 |
| 180 | 1.95 | 0.95 | -184.0658689 | -184.0215165 | 9.6484  | 10.8552 |
| 180 | 1.95 | 1    | -184.1257771 | -            | 8.01829 | -       |
| 180 | 1.95 | 1.05 | -184.1614195 | -            | 7.04846 | -       |
| 180 | 1.95 | 1.1  | -184.1795731 | -            | 6.55451 | -       |
| 180 | 1.95 | 1.15 | -184.1852709 | -            | 6.39947 | -       |
| 180 | 1.95 | 1.2  | -184.1822726 | -            | 6.48105 | -       |
| 180 | 1.95 | 1.25 | -184.1733736 | -            | 6.7232  | -       |
| 180 | 1.95 | 1.3  | -184.1606319 | -            | 7.0699  | -       |
| 180 | 1.95 | 1.35 | -184.1455415 | -            | 7.4805  | -       |
| 180 | 1.95 | 1.4  | -184.1291662 | -            | 7.92608 | -       |
| 180 | 1.95 | 1.45 | -184.1122791 | -            | 8.38557 | -       |
| 180 | 1.95 | 1.5  | -184.095475  | -            | 8.84282 | -       |
| 180 | 1.95 | 1.55 | -184.0793553 | -            | 9.28143 | -       |
| 180 | 1.95 | 1.6  | -184.0646049 | -            | 9.68279 | -       |
| 180 | 1.95 | 1.65 | -184.0517792 | -            | 10.0318 | -       |
| 180 | 1.95 | 1.7  | -184.0409897 | -            | 10.3254 | -       |
| 180 | 1.95 | 1.75 | -184.0319802 | -            | 10.5705 | -       |
| 180 | 1.95 | 1.8  | -184.024424  | -            | 10.7761 | -       |
| 180 | 1.95 | 1.85 | -184.0180911 | -            | 10.9484 | -       |
| 180 | 1.95 | 1.9  | -184.0128749 | -            | 11.0904 | -       |
| 180 | 1.95 | 1.95 | -184.0087173 | -            | 11.2035 | -       |
| 180 | 1.95 | 2    | -184.005522  | -            | 11.2904 | -       |
| 180 | 2    | 0.9  | -183.9656314 | -183.9306519 | 12.3759 | 13.3277 |
| 180 | 2    | 0.95 | -184.0586645 | -184.0156163 | 9.84443 | 11.0158 |
| 180 | 2    | 1    | -184.1183414 | -            | 8.22062 | -       |
| 180 | 2    | 1.05 | -184.1538525 | -            | 7.25436 | -       |
| 180 | 2    | 1.1  | -184.1719108 | -            | 6.763   | -       |
| 180 | 2    | 1.15 | -184.177515  | -            | 6.61051 | -       |
| 180 | 2    | 1.2  | -184.1744109 | -            | 6.69497 | -       |
| 180 | 2    | 1.25 | -184.1653929 | -            | 6.94035 | -       |
| 180 | 2    | 1.3  | -184.1525238 | -            | 7.29052 | -       |
| 180 | 2    | 1.35 | -184.1373054 | -            | 7.70461 | -       |
| 180 | 2    | 1.4  | -184.1208118 | -            | 8.1534  | -       |
| 180 | 2    | 1.45 | -184.1038207 | -            | 8.61573 | -       |
| 180 | 2    | 1.5  | -184.0869438 | -            | 9.07495 | -       |
| 180 | 2    | 1.55 | -184.0708036 | -            | 9.51412 | -       |
| 180 | 2    | 1.6  | -184.0561553 | -            | 9.9127  | -       |
| 180 | 2    | 1.65 | -184.0436843 | -            | 10.252  | -       |
| 180 | 2    | 1.7  | -184.0335999 | -            | 10.5264 | -       |
| 180 | 2    | 1.75 | -184.0256572 | -            | 10.7426 | -       |
| 180 | 2    | 1.8  | -184.0194865 | -            | 10.9105 | -       |
| 180 | 2    | 1.85 | -184.014787  | -            | 11.0383 | -       |
| 180 | 2    | 1.9  | -184.0113571 | -            | 11.1317 | -       |
| 180 | 2    | 1.95 | -184.0090319 | -            | 11.1949 | -       |
| 180 | 2    | 2    | -184.0075997 | -            | 11.2339 | -       |
